# Supplementary material for: A novel ATP dependent dimethylsulfoniopropionate lyase in bacteria that releases dimethyl sulfide and acryloyl-CoA
Source: eLife. 2021 May 10;10:e64045. doi: 10.7554/eLife.64045 (PMC8163506; doi:10.7554/eLife.64045)
Supplement: Figure 2—figure supplement 1—source data 1. [file elife-64045-fig4-data4.xls]

## Sheet: Fig. S1B
	Number of isolated strains
	Pseudoalteromonas	Psychrobacter	Arthrobacter	Arcobacter	Paraglaciecola	Polaribacter
Sample 1	6	16	1	0	0	0
Sample 2	0	11	0	0	0	0
Sample 3	3	29	0	2	0	0
Sample 4	37	15	0	0	2	10
Sample 5	37	6	0	0	0	0
