# Supplementary material for: A novel ATP dependent dimethylsulfoniopropionate lyase in bacteria that releases dimethyl sulfide and acryloyl-CoA
Source: eLife. 2021 May 10;10:e64045. doi: 10.7554/eLife.64045 (PMC8163506; doi:10.7554/eLife.64045)
Supplement: Figure 2—figure supplement 2—source data 1. [file elife-64045-fig5-data5.xls]

## Sheet: Fig. S2
Gene	DMSP	Control	Fold change(DMSP/Control)
1696	3548.5	49.87	71.16
1697	4629.92	21.8	212.38
1698	25583	104.9	243.88
1699	13761	83.38	165.04
