# Supplementary material for: A novel ATP dependent dimethylsulfoniopropionate lyase in bacteria that releases dimethyl sulfide and acryloyl-CoA
Source: eLife. 2021 May 10;10:e64045. doi: 10.7554/eLife.64045 (PMC8163506; doi:10.7554/eLife.64045)
Supplement: Figure 2—source data 1. [file elife-64045-fig2-data1.xlsx]

## Sheet: Fig. 2A
Time(h)	OD(600 nm)
	DMSP			Sodium pyruvate			Acrylate			No carbon
0	0.045	0.049	0.045	0.044	0.043	0.043	0.049	0.048	0.045	0.045	0.045	0.044
12	0.044	0.04	0.042	0.029	0.041	0.024	0.032	0.025	0.024	0.018	0.027	0.018
25	0.152	0.137	0.138	0.058	0.039	0.044	0.028	0.034	0.03	0.029	0.024	0.021
30	0.242	0.199	0.201	0.052	0.056	0.05	0.012	0.02	0.027	0.019	0.014	0.024
36	0.354	0.338	0.329	0.06	0.074	0.075	0.024	0.02	0.019	0.021	0.023	0.018
48	0.396	0.414	0.401	0.148	0.153	0.167	0.019	0.009	0.014	0.021	0.016	0.017
54	0.404	0.427	0.409	0.197	0.225	0.229	0.02	0.015	0.011	0.019	0.018	0.018
60	0.408	0.437	0.408	0.285	0.309	0.321	0.036	0.02	0.016	0.017	0.015	0.018
72	0.425	0.451	0.432	0.358	0.341	0.341	0.023	0.013	0.018	0.014	0.014	0.019
84	0.426	0.449	0.427	0.338	0.351	0.343	0.026	0.016	0.014	0.02	0.019	0.013
96	0.414	0.423	0.41	0.326	0.348	0.339	0.014	0.012	0.014	0.017	0.019	0.018
108	0.395	0.401	0.4	0.336	0.351	0.336	0.011	0.022	0.013	0.014	0.025	0.012
120	0.37	0.383	0.372	0.338	0.346	0.332	0.021	0.011	0.01	0.019	0.03	0.019
