# Supplementary material for: A novel ATP dependent dimethylsulfoniopropionate lyase in bacteria that releases dimethyl sulfide and acryloyl-CoA
Source: eLife. 2021 May 10;10:e64045. doi: 10.7554/eLife.64045 (PMC8163506; doi:10.7554/eLife.64045)
Supplement: Figure 2—source data 2. [file elife-64045-fig2-data2.xlsx]

## Sheet: Fig. 2B
	Intensity(μV)
Retention time(min)	Psychrobacter sp. D2	Culture medium without bacteria	DMS standard
0	1139	2208	-82530
0.00067	1133	2189	-82560
0.00133	1125	2171	-82600
0.002	1119	2151	-82640
0.00267	1112	2133	-82680
0.00333	1107	2116	-82730
0.004	1101	2098	-82780
0.00467	1096	2079	-82840
0.00533	1090	2061	-82900
0.006	1083	2043	-82970
0.00667	1077	2027	-83030
0.00733	1072	2011	-83090
0.008	1066	1996	-83140
0.00867	1058	1981	-83200
0.00933	1051	1967	-83250
0.01	1044	1952	-83310
0.01067	1037	1940	-83350
0.01133	1029	1930	-83370
0.012	1022	1920	-83400
0.01267	1015	1910	-83420
0.01333	1009	1900	-83450
0.014	1003	1888	-83470
0.01467	998	1877	-83500
0.01533	992	1866	-83520
0.016	987	1853	-83520
0.01667	983	1840	-83550
0.01733	978	1827	-83570
0.018	974	1814	-83590
0.01867	971	1802	-83610
0.01933	967	1788	-83620
0.02	962	1775	-83650
0.02067	958	1762	-83680
0.02133	952	1748	-83710
0.022	946	1736	-83740
0.02267	940	1723	-83750
0.02333	934	1711	-83760
0.024	930	1699	-83760
0.02467	927	1687	-83770
0.02533	924	1675	-83780
0.026	922	1662	-83790
0.02667	919	1649	-83800
0.02733	917	1636	-83800
0.028	915	1624	-83800
0.02867	912	1614	-83800
0.02933	910	1605	-83810
0.03	909	1596	-83810
0.03067	907	1585	-83800
0.03133	905	1575	-83800
0.032	903	1564	-83790
0.03267	901	1553	-83780
0.03333	900	1541	-83760
0.034	899	1529	-83750
0.03467	899	1518	-83740
0.03533	898	1506	-83710
0.036	896	1496	-83690
0.03667	894	1487	-83680
0.03733	892	1477	-83650
0.038	889	1466	-83620
0.03867	887	1455	-83590
0.03933	885	1445	-83570
0.04	883	1434	-83550
0.04067	881	1424	-83540
0.04133	879	1413	-83530
0.042	878	1402	-83540
0.04267	876	1391	-83540
0.04333	875	1380	-83550
0.044	871	1369	-83550
0.04467	866	1358	-83550
0.04533	860	1346	-83550
0.046	853	1334	-83550
0.04667	846	1321	-83560
0.04733	839	1309	-83580
0.048	832	1296	-83610
0.04867	826	1283	-83670
0.04933	820	1270	-83750
0.05	813	1257	-83820
0.05067	808	1244	-83880
0.05133	803	1231	-83920
0.052	800	1219	-83960
0.05267	796	1207	-84000
0.05333	792	1196	-84070
0.054	788	1186	-84150
0.05467	785	1177	-84200
0.05533	783	1169	-84240
0.056	781	1161	-84270
0.05667	778	1153	-84290
0.05733	774	1147	-84310
0.058	769	1140	-84310
0.05867	764	1132	-84320
0.05933	759	1124	-84310
0.06	755	1116	-84320
0.06067	751	1108	-84330
0.06133	745	1101	-84340
0.062	740	1093	-84340
0.06267	734	1086	-84350
0.06333	729	1079	-84360
0.064	725	1071	-84370
0.06467	721	1064	-84390
0.06533	716	1058	-84420
0.066	711	1053	-84450
0.06667	707	1047	-84470
0.06733	703	1041	-84490
0.068	699	1035	-84520
0.06867	696	1029	-84540
0.06933	693	1023	-84570
0.07	689	1016	-84590
0.07067	684	1009	-84610
0.07133	681	1003	-84630
0.072	677	997	-84640
0.07267	673	991	-84640
0.07333	669	984	-84660
0.074	666	977	-84680
0.07467	663	968	-84690
0.07533	660	960	-84700
0.076	658	952	-84700
0.07667	655	945	-84700
0.07733	652	939	-84700
0.078	648	932	-84700
0.07867	645	925	-84710
0.07933	645	920	-84710
0.08	643	914	-84710
0.08067	642	908	-84720
0.08133	639	901	-84760
0.082	635	895	-84800
0.08267	632	888	-84820
0.08333	628	884	-84840
0.084	625	879	-84840
0.08467	622	876	-84850
0.08533	620	873	-84860
0.086	618	871	-84860
0.08667	615	867	-84870
0.08733	611	864	-84880
0.088	607	860	-84900
0.08867	603	854	-84920
0.08933	598	849	-84930
0.09	594	844	-84930
0.09067	589	840	-84920
0.09133	584	834	-84910
0.092	578	828	-84920
0.09267	572	822	-84930
0.09333	567	816	-84930
0.094	561	809	-84930
0.09467	555	802	-84930
0.09533	549	795	-84940
0.096	544	789	-84970
0.09667	540	783	-85000
0.09733	536	777	-85030
0.098	533	771	-85050
0.09867	531	763	-85070
0.09933	530	756	-85090
0.1	530	749	-85120
0.10067	530	742	-85140
0.10133	530	736	-85170
0.102	529	730	-85200
0.10267	529	724	-85240
0.10333	528	718	-85270
0.104	528	712	-85310
0.10467	528	705	-85360
0.10533	528	699	-85400
0.106	527	694	-85450
0.10667	525	690	-85490
0.10733	524	686	-85520
0.108	522	683	-85540
0.10867	520	680	-85560
0.10933	518	676	-85570
0.11	515	672	-85580
0.11067	514	668	-85590
0.11133	512	665	-85590
0.112	509	660	-85580
0.11267	506	653	-85560
0.11333	504	646	-85540
0.114	500	639	-85530
0.11467	497	633	-85520
0.11533	494	627	-85500
0.116	492	621	-85470
0.11667	490	617	-85430
0.11733	488	612	-85390
0.118	486	606	-85340
0.11867	484	600	-85310
0.11933	481	593	-85280
0.12	480	586	-85230
0.12067	479	580	-85180
0.12133	477	574	-85110
0.122	477	568	-85060
0.12267	477	563	-85020
0.12333	477	559	-84980
0.124	478	554	-84950
0.12467	479	548	-84900
0.12533	479	541	-84860
0.126	478	535	-84790
0.12667	477	530	-84730
0.12733	475	526	-84680
0.128	474	520	-84640
0.12867	474	515	-84620
0.12933	474	510	-84610
0.13	474	505	-84590
0.13067	474	499	-84580
0.13133	475	493	-84580
0.132	475	487	-84580
0.13267	475	482	-84580
0.13333	475	478	-84560
0.134	475	473	-84550
0.13467	474	468	-84530
0.13533	475	463	-84520
0.136	476	457	-84510
0.13667	477	450	-84510
0.13733	477	444	-84510
0.138	477	438	-84510
0.13867	477	434	-84520
0.13933	478	430	-84530
0.14	480	428	-84550
0.14067	482	425	-84550
0.14133	485	421	-84560
0.142	489	418	-84580
0.14267	492	417	-84610
0.14333	494	416	-84620
0.144	494	416	-84630
0.14467	494	415	-84630
0.14533	493	413	-84630
0.146	492	411	-84640
0.14667	490	408	-84630
0.14733	488	405	-84610
0.148	486	404	-84600
0.14867	484	403	-84580
0.14933	481	401	-84570
0.15	479	400	-84550
0.15067	479	398	-84530
0.15133	478	396	-84480
0.152	477	392	-84450
0.15267	476	389	-84420
0.15333	476	386	-84380
0.154	475	382	-84350
0.15467	473	379	-84320
0.15533	470	376	-84300
0.156	466	372	-84280
0.15667	462	368	-84270
0.15733	457	363	-84280
0.158	452	357	-84280
0.15867	446	352	-84270
0.15933	441	346	-84260
0.16	436	339	-84270
0.16067	432	332	-84270
0.16133	428	325	-84270
0.162	425	319	-84270
0.16267	422	314	-84280
0.16333	417	310	-84280
0.164	413	305	-84280
0.16467	408	299	-84290
0.16533	403	293	-84300
0.166	398	288	-84320
0.16667	395	284	-84320
0.16733	392	281	-84330
0.168	390	278	-84340
0.16867	388	274	-84350
0.16933	387	272	-84360
0.17	386	269	-84370
0.17067	385	266	-84370
0.17133	383	262	-84370
0.172	381	259	-84360
0.17267	379	256	-84350
0.17333	376	254	-84330
0.174	373	253	-84320
0.17467	369	252	-84320
0.17533	365	251	-84300
0.176	362	251	-84270
0.17667	358	253	-84230
0.17733	354	254	-84190
0.178	350	254	-84150
0.17867	347	256	-84120
0.17933	344	257	-84090
0.18	342	256	-84070
0.18067	340	256	-84080
0.18133	339	255	-84080
0.182	337	255	-84080
0.18267	335	254	-84080
0.18333	334	253	-84080
0.184	333	251	-84080
0.18467	332	248	-84070
0.18533	331	244	-84060
0.186	330	242	-84050
0.18667	329	239	-84030
0.18733	328	237	-84000
0.188	326	233	-83990
0.18867	325	228	-83980
0.18933	323	224	-83950
0.19	321	220	-83920
0.19067	320	217	-83900
0.19133	318	213	-83900
0.192	316	211	-83890
0.19267	315	208	-83880
0.19333	315	205	-83870
0.194	315	204	-83830
0.19467	314	203	-83800
0.19533	313	202	-83770
0.196	312	201	-83730
0.19667	311	199	-83680
0.19733	311	197	-83650
0.198	311	194	-83620
0.19867	310	194	-83600
0.19933	309	194	-83580
0.2	309	195	-83580
0.20067	306	196	-83570
0.20133	303	197	-83580
0.202	300	199	-83590
0.20267	298	201	-83640
0.20333	296	204	-83700
0.204	295	206	-83780
0.20467	296	208	-83860
0.20533	298	210	-83940
0.206	299	211	-84030
0.20667	300	213	-84110
0.20733	302	213	-84190
0.208	303	214	-84280
0.20867	305	214	-84370
0.20933	305	213	-84470
0.21	306	212	-84570
0.21067	306	211	-84680
0.21133	306	210	-84770
0.212	304	209	-84860
0.21267	302	208	-84950
0.21333	301	208	-85040
0.214	301	208	-85110
0.21467	302	208	-85150
0.21533	303	208	-85200
0.216	304	208	-85250
0.21667	303	210	-85280
0.21733	303	211	-85330
0.218	304	212	-85380
0.21867	304	213	-85420
0.21933	303	212	-85470
0.22	301	208	-85530
0.22067	299	204	-85570
0.22133	296	200	-85600
0.222	292	197	-85600
0.22267	290	194	-85600
0.22333	287	189	-85610
0.224	286	185	-85610
0.22467	286	180	-85600
0.22533	285	174	-85590
0.226	286	169	-85590
0.22667	286	165	-85590
0.22733	286	161	-85590
0.228	286	157	-85580
0.22867	285	154	-85570
0.22933	285	150	-85560
0.23	284	146	-85530
0.23067	282	142	-85510
0.23133	280	140	-85480
0.232	279	138	-85460
0.23267	278	137	-85440
0.23333	277	137	-85430
0.234	276	136	-85410
0.23467	275	136	-85400
0.23533	275	135	-85390
0.236	276	136	-85370
0.23667	276	136	-85350
0.23733	276	136	-85330
0.238	276	135	-85310
0.23867	276	134	-85290
0.23933	276	132	-85250
0.24	277	130	-85220
0.24067	279	129	-85190
0.24133	281	128	-85160
0.242	283	126	-85120
0.24267	285	125	-85070
0.24333	286	124	-85020
0.244	287	123	-84990
0.24467	287	123	-84970
0.24533	288	122	-84950
0.246	288	121	-84920
0.24667	288	119	-84900
0.24733	287	118	-84870
0.248	287	119	-84840
0.24867	287	120	-84800
0.24933	286	122	-84760
0.25	286	124	-84710
0.25067	286	124	-84650
0.25133	286	124	-84600
0.252	286	122	-84540
0.25267	287	122	-84480
0.25333	288	122	-84440
0.254	288	122	-84380
0.25467	289	122	-84320
0.25533	291	122	-84260
0.256	292	123	-84230
0.25667	293	124	-84190
0.25733	294	125	-84150
0.258	294	127	-84130
0.25867	294	128	-84100
0.25933	293	128	-84070
0.26	291	129	-84050
0.26067	287	128	-84020
0.26133	284	128	-83990
0.262	280	129	-83970
0.26267	277	130	-83950
0.26333	275	131	-83920
0.264	272	133	-83910
0.26467	270	135	-83910
0.26533	267	136	-83920
0.266	265	138	-83950
0.26667	264	140	-83990
0.26733	262	140	-84030
0.268	259	142	-84060
0.26867	259	142	-84110
0.26933	259	142	-84160
0.27	258	142	-84200
0.27067	257	142	-84240
0.27133	256	142	-84270
0.272	255	141	-84290
0.27267	254	141	-84290
0.27333	252	141	-84270
0.274	251	140	-84250
0.27467	251	141	-84230
0.27533	250	143	-84210
0.276	250	145	-84170
0.27667	249	146	-84150
0.27733	249	146	-84140
0.278	250	147	-84130
0.27867	251	148	-84110
0.27933	254	150	-84090
0.28	256	152	-84070
0.28067	258	154	-84050
0.28133	260	156	-84040
0.282	261	158	-84030
0.28267	262	160	-84020
0.28333	265	160	-84020
0.284	267	160	-84020
0.28467	268	160	-84020
0.28533	268	162	-84030
0.286	267	162	-84030
0.28667	268	162	-84030
0.28733	268	162	-84030
0.288	269	162	-84060
0.28867	270	162	-84070
0.28933	272	161	-84090
0.29	273	160	-84100
0.29067	274	158	-84100
0.29133	275	157	-84110
0.292	276	156	-84110
0.29267	278	154	-84110
0.29333	280	153	-84110
0.294	282	152	-84100
0.29467	282	152	-84090
0.29533	284	152	-84090
0.296	287	150	-84080
0.29667	291	149	-84070
0.29733	294	149	-84060
0.298	297	150	-84050
0.29867	298	151	-84050
0.29933	300	154	-84040
0.3	302	156	-84030
0.30067	303	158	-84040
0.30133	304	160	-84060
0.302	305	161	-84090
0.30267	307	163	-84120
0.30333	308	165	-84140
0.304	310	167	-84140
0.30467	311	169	-84120
0.30533	313	169	-84110
0.306	316	170	-84090
0.30667	320	170	-84080
0.30733	323	170	-84060
0.308	325	170	-84050
0.30867	326	172	-84050
0.30933	325	173	-84060
0.31	326	174	-84060
0.31067	327	175	-84040
0.31133	327	178	-84010
0.312	328	179	-83980
0.31267	327	180	-83950
0.31333	326	180	-83920
0.314	326	179	-83910
0.31467	327	177	-83910
0.31533	327	174	-83930
0.316	327	172	-83940
0.31667	326	170	-83960
0.31733	325	169	-83990
0.318	325	170	-84000
0.31867	324	171	-84010
0.31933	323	171	-84020
0.32	321	170	-84020
0.32067	320	169	-84020
0.32133	318	168	-84010
0.322	317	166	-84000
0.32267	317	165	-83990
0.32333	318	164	-83980
0.324	318	163	-83960
0.32467	318	161	-83950
0.32533	317	159	-83950
0.326	317	157	-83950
0.32667	317	154	-83940
0.32733	317	151	-83940
0.328	317	148	-83960
0.32867	317	145	-83980
0.32933	316	142	-84000
0.33	315	141	-84040
0.33067	314	140	-84080
0.33133	313	139	-84120
0.332	311	138	-84160
0.33267	309	138	-84200
0.33333	306	138	-84230
0.334	304	139	-84270
0.33467	302	138	-84310
0.33533	303	138	-84340
0.336	303	137	-84360
0.33667	302	138	-84380
0.33733	301	138	-84400
0.338	300	139	-84410
0.33867	299	140	-84410
0.33933	299	140	-84420
0.34	300	140	-84420
0.34067	301	139	-84410
0.34133	302	137	-84400
0.342	303	135	-84390
0.34267	304	131	-84390
0.34333	305	126	-84380
0.344	306	121	-84370
0.34467	309	115	-84370
0.34533	310	109	-84380
0.346	311	103	-84400
0.34667	311	97	-84410
0.34733	311	91	-84430
0.348	311	86	-84460
0.34867	312	80	-84500
0.34933	312	76	-84550
0.35	312	70	-84610
0.35067	312	65	-84680
0.35133	312	62	-84750
0.352	310	58	-84810
0.35267	308	56	-84860
0.35333	307	54	-84900
0.354	306	51	-84940
0.35467	305	48	-84960
0.35533	303	47	-84970
0.356	300	46	-84980
0.35667	296	46	-84980
0.35733	293	46	-84980
0.358	290	47	-84990
0.35867	288	48	-85000
0.35933	285	47	-85010
0.36	282	46	-85020
0.36067	278	44	-85030
0.36133	275	44	-85010
0.362	271	42	-84980
0.36267	268	40	-84940
0.36333	267	39	-84910
0.364	265	38	-84900
0.36467	263	37	-84900
0.36533	260	37	-84910
0.366	258	37	-84930
0.36667	255	39	-84930
0.36733	250	41	-84930
0.368	246	45	-84920
0.36867	241	49	-84910
0.36933	237	52	-84900
0.37	233	54	-84880
0.37067	228	56	-84850
0.37133	225	57	-84820
0.372	223	59	-84790
0.37267	221	59	-84760
0.37333	220	60	-84740
0.374	219	61	-84710
0.37467	216	62	-84690
0.37533	215	64	-84660
0.376	214	67	-84640
0.37667	215	70	-84620
0.37733	216	74	-84590
0.378	218	76	-84570
0.37867	218	79	-84560
0.37933	219	81	-84550
0.38	220	83	-84540
0.38067	221	85	-84540
0.38133	222	88	-84530
0.382	223	91	-84510
0.38267	223	93	-84490
0.38333	223	94	-84470
0.384	222	94	-84450
0.38467	221	93	-84440
0.38533	220	93	-84440
0.386	219	94	-84450
0.38667	218	95	-84440
0.38733	218	98	-84430
0.388	219	101	-84410
0.38867	219	103	-84400
0.38933	220	105	-84380
0.39	222	108	-84370
0.39067	225	111	-84350
0.39133	227	116	-84340
0.392	229	121	-84320
0.39267	230	127	-84300
0.39333	231	133	-84280
0.394	232	139	-84260
0.39467	233	143	-84250
0.39533	235	147	-84250
0.396	235	148	-84240
0.39667	236	148	-84220
0.39733	238	148	-84200
0.398	240	148	-84180
0.39867	241	149	-84150
0.39933	242	151	-84120
0.4	243	152	-84080
0.40067	245	153	-84060
0.40133	245	153	-84040
0.402	245	153	-84010
0.40267	245	153	-83980
0.40333	245	152	-83960
0.404	245	150	-83940
0.40467	246	149	-83910
0.40533	246	149	-83890
0.406	247	149	-83870
0.40667	248	149	-83850
0.40733	251	148	-83830
0.408	254	147	-83820
0.40867	257	144	-83820
0.40933	260	142	-83820
0.41	262	139	-83840
0.41067	263	135	-83860
0.41133	264	131	-83890
0.412	264	127	-83910
0.41267	265	124	-83920
0.41333	265	121	-83930
0.414	264	118	-83940
0.41467	263	114	-83960
0.41533	262	110	-83980
0.416	261	105	-83990
0.41667	260	101	-84010
0.41733	259	97	-84010
0.418	257	92	-84010
0.41867	256	90	-84020
0.41933	253	88	-84030
0.42	251	87	-84030
0.42067	250	86	-84040
0.42133	249	85	-84060
0.422	248	83	-84070
0.42267	248	83	-84070
0.42333	247	81	-84070
0.424	245	80	-84070
0.42467	244	79	-84090
0.42533	242	80	-84110
0.426	240	80	-84110
0.42667	238	81	-84120
0.42733	236	81	-84140
0.428	233	78	-84150
0.42867	230	75	-84160
0.42933	228	72	-84160
0.43	226	71	-84180
0.43067	224	70	-84220
0.43133	222	70	-84250
0.432	220	70	-84290
0.43267	217	70	-84300
0.43333	216	70	-84300
0.434	215	70	-84300
0.43467	215	70	-84290
0.43533	215	71	-84280
0.436	214	72	-84260
0.43667	212	73	-84240
0.43733	210	74	-84220
0.438	208	76	-84200
0.43867	206	77	-84170
0.43933	203	78	-84150
0.44	199	80	-84150
0.44067	197	82	-84160
0.44133	195	84	-84170
0.442	193	86	-84190
0.44267	191	89	-84220
0.44333	189	92	-84260
0.444	187	95	-84290
0.44467	187	97	-84310
0.44533	187	99	-84340
0.446	188	100	-84360
0.44667	188	100	-84390
0.44733	189	101	-84430
0.448	190	102	-84470
0.44867	191	102	-84500
0.44933	191	102	-84520
0.45	191	101	-84540
0.45067	191	100	-84570
0.45133	190	98	-84600
0.452	189	96	-84630
0.45267	187	93	-84640
0.45333	184	91	-84660
0.454	180	90	-84670
0.45467	177	89	-84690
0.45533	175	89	-84700
0.456	174	89	-84710
0.45667	173	87	-84730
0.45733	172	84	-84750
0.458	171	81	-84780
0.45867	170	77	-84810
0.45933	170	72	-84840
0.46	171	69	-84880
0.46067	174	66	-84920
0.46133	178	64	-84960
0.462	181	62	-85000
0.46267	185	60	-85030
0.46333	189	58	-85050
0.464	192	56	-85090
0.46467	196	56	-85110
0.46533	199	54	-85120
0.466	203	52	-85120
0.46667	205	53	-85120
0.46733	207	53	-85110
0.468	209	54	-85100
0.46867	211	55	-85080
0.46933	213	55	-85060
0.47	215	56	-85050
0.47067	218	55	-85050
0.47133	221	55	-85070
0.472	224	55	-85080
0.47267	226	54	-85090
0.47333	227	53	-85110
0.474	228	51	-85130
0.47467	228	49	-85140
0.47533	227	47	-85140
0.476	226	46	-85140
0.47667	225	44	-85140
0.47733	223	42	-85130
0.478	220	40	-85110
0.47867	218	40	-85080
0.47933	214	40	-85060
0.48	212	41	-85040
0.48067	210	42	-85020
0.48133	209	42	-85000
0.482	208	42	-84980
0.48267	208	41	-84960
0.48333	208	40	-84950
0.484	207	41	-84950
0.48467	206	42	-84940
0.48533	207	44	-84930
0.486	207	46	-84910
0.48667	207	48	-84880
0.48733	207	50	-84850
0.488	205	52	-84830
0.48867	204	53	-84810
0.48933	204	54	-84810
0.49	203	56	-84790
0.49067	203	58	-84780
0.49133	202	60	-84770
0.492	202	62	-84740
0.49267	202	64	-84710
0.49333	201	67	-84680
0.494	200	68	-84660
0.49467	198	69	-84620
0.49533	195	70	-84580
0.496	193	71	-84540
0.49667	191	71	-84500
0.49733	188	71	-84470
0.498	185	73	-84440
0.49867	183	75	-84420
0.49933	179	77	-84390
0.5	176	80	-84370
0.50067	173	82	-84380
0.50133	172	85	-84400
0.502	170	88	-84400
0.50267	170	92	-84400
0.50333	170	95	-84390
0.504	170	97	-84400
0.50467	171	99	-84380
0.50533	173	99	-84360
0.506	175	100	-84340
0.50667	177	101	-84340
0.50733	180	102	-84330
0.508	182	105	-84330
0.50867	184	108	-84340
0.50933	187	110	-84350
0.51	189	111	-84380
0.51067	191	111	-84410
0.51133	194	110	-84440
0.512	197	109	-84450
0.51267	201	108	-84460
0.51333	204	107	-84490
0.514	208	106	-84500
0.51467	211	107	-84530
0.51533	215	107	-84560
0.516	218	105	-84580
0.51667	219	104	-84590
0.51733	218	102	-84610
0.518	216	100	-84620
0.51867	215	98	-84640
0.51933	214	97	-84640
0.52	213	95	-84640
0.52067	212	92	-84640
0.52133	211	88	-84640
0.522	211	86	-84650
0.52267	210	83	-84650
0.52333	210	80	-84640
0.524	210	78	-84630
0.52467	210	77	-84640
0.52533	211	76	-84640
0.526	212	75	-84630
0.52667	213	74	-84620
0.52733	215	74	-84610
0.528	217	76	-84610
0.52867	219	77	-84610
0.52933	222	76	-84610
0.53	224	76	-84600
0.53067	227	75	-84610
0.53133	230	76	-84640
0.532	233	76	-84670
0.53267	237	77	-84690
0.53333	242	78	-84700
0.534	245	82	-84720
0.53467	248	85	-84730
0.53533	252	87	-84740
0.536	256	89	-84740
0.53667	259	91	-84730
0.53733	261	94	-84720
0.538	264	96	-84720
0.53867	267	98	-84720
0.53933	270	100	-84710
0.54	272	102	-84700
0.54067	274	104	-84670
0.54133	276	105	-84650
0.542	277	106	-84630
0.54267	279	107	-84620
0.54333	282	108	-84600
0.544	284	108	-84570
0.54467	286	107	-84540
0.54533	288	105	-84520
0.546	290	102	-84500
0.54667	292	101	-84480
0.54733	294	99	-84470
0.548	296	97	-84460
0.54867	298	96	-84460
0.54933	300	95	-84450
0.55	302	93	-84440
0.55067	304	91	-84440
0.55133	304	89	-84430
0.552	303	85	-84430
0.55267	302	81	-84410
0.55333	301	77	-84390
0.554	300	72	-84370
0.55467	299	67	-84340
0.55533	298	61	-84310
0.556	297	57	-84270
0.55667	295	52	-84230
0.55733	293	48	-84200
0.558	290	45	-84180
0.55867	288	43	-84180
0.55933	286	42	-84180
0.56	283	41	-84180
0.56067	281	40	-84170
0.56133	278	38	-84170
0.562	277	36	-84170
0.56267	274	34	-84170
0.56333	273	33	-84150
0.564	271	33	-84140
0.56467	269	32	-84130
0.56533	267	31	-84120
0.566	265	31	-84100
0.56667	264	31	-84060
0.56733	263	31	-84020
0.568	262	32	-84000
0.56867	263	34	-83980
0.56933	264	37	-83980
0.57	264	39	-83990
0.57067	263	42	-84010
0.57133	263	44	-84050
0.572	263	45	-84090
0.57267	263	47	-84130
0.57333	263	49	-84160
0.574	262	51	-84180
0.57467	261	53	-84210
0.57533	260	57	-84250
0.576	260	60	-84290
0.57667	258	64	-84310
0.57733	256	67	-84340
0.578	253	69	-84380
0.57867	249	72	-84400
0.57933	245	75	-84420
0.58	242	76	-84420
0.58067	239	76	-84420
0.58133	237	76	-84430
0.582	235	76	-84440
0.58267	233	76	-84440
0.58333	232	77	-84430
0.584	232	77	-84420
0.58467	233	79	-84400
0.58533	234	82	-84380
0.586	234	84	-84340
0.58667	234	85	-84290
0.58733	234	86	-84240
0.588	235	85	-84180
0.58867	235	83	-84130
0.58933	234	82	-84080
0.59	234	81	-84040
0.59067	233	81	-84010
0.59133	233	81	-83980
0.592	232	81	-83970
0.59267	231	81	-83960
0.59333	232	81	-83960
0.594	232	81	-83980
0.59467	232	82	-83970
0.59533	232	83	-83970
0.596	233	82	-83990
0.59667	233	82	-84010
0.59733	233	83	-84040
0.598	233	84	-84060
0.59867	233	85	-84090
0.59933	235	85	-84120
0.6	236	87	-84150
0.60067	237	88	-84180
0.60133	238	88	-84200
0.602	239	88	-84190
0.60267	239	89	-84200
0.60333	239	89	-84210
0.604	240	89	-84210
0.60467	240	89	-84220
0.60533	240	91	-84240
0.606	241	92	-84250
0.60667	241	93	-84270
0.60733	241	93	-84290
0.608	242	94	-84310
0.60867	243	94	-84330
0.60933	245	94	-84350
0.61	248	92	-84380
0.61067	250	90	-84420
0.61133	252	87	-84460
0.612	251	86	-84500
0.61267	251	85	-84540
0.61333	251	85	-84570
0.614	251	84	-84610
0.61467	252	82	-84620
0.61533	254	81	-84630
0.616	256	79	-84630
0.61667	258	76	-84620
0.61733	260	73	-84630
0.618	264	68	-84650
0.61867	267	65	-84670
0.61933	271	61	-84690
0.62	275	58	-84710
0.62067	281	56	-84730
0.62133	286	54	-84760
0.622	293	53	-84780
0.62267	299	52	-84790
0.62333	304	52	-84800
0.624	309	52	-84810
0.62467	312	51	-84810
0.62533	315	50	-84790
0.626	318	48	-84780
0.62667	320	47	-84770
0.62733	322	45	-84740
0.628	323	43	-84710
0.62867	323	40	-84680
0.62933	324	38	-84650
0.63	325	36	-84620
0.63067	325	34	-84590
0.63133	325	32	-84560
0.632	325	30	-84540
0.63267	325	27	-84520
0.63333	323	24	-84510
0.634	321	22	-84500
0.63467	319	20	-84490
0.63533	316	19	-84480
0.636	312	17	-84480
0.63667	309	16	-84470
0.63733	305	15	-84450
0.638	301	14	-84450
0.63867	298	14	-84450
0.63933	295	14	-84480
0.64	292	13	-84500
0.64067	290	12	-84520
0.64133	287	12	-84560
0.642	284	12	-84600
0.64267	281	12	-84630
0.64333	278	13	-84640
0.644	276	14	-84660
0.64467	274	16	-84680
0.64533	273	20	-84720
0.646	271	23	-84760
0.64667	270	25	-84810
0.64733	269	25	-84860
0.648	268	23	-84910
0.64867	268	21	-84960
0.64933	268	20	-85010
0.65	268	19	-85050
0.65067	269	18	-85090
0.65133	269	18	-85140
0.652	270	20	-85190
0.65267	269	22	-85230
0.65333	269	22	-85260
0.654	266	22	-85290
0.65467	264	22	-85310
0.65533	262	22	-85340
0.656	260	24	-85360
0.65667	260	25	-85390
0.65733	259	26	-85430
0.658	260	24	-85460
0.65867	261	23	-85490
0.65933	263	23	-85500
0.66	263	23	-85510
0.66067	264	24	-85500
0.66133	264	25	-85510
0.662	263	26	-85510
0.66267	263	29	-85530
0.66333	262	31	-85530
0.664	260	34	-85540
0.66467	257	36	-85550
0.66533	254	37	-85550
0.666	250	39	-85550
0.66667	248	42	-85560
0.66733	246	45	-85550
0.668	245	49	-85540
0.66867	243	52	-85510
0.66933	242	55	-85490
0.67	240	58	-85460
0.67067	238	60	-85440
0.67133	236	62	-85420
0.672	235	64	-85410
0.67267	233	64	-85420
0.67333	232	65	-85440
0.674	231	64	-85460
0.67467	229	65	-85470
0.67533	229	65	-85480
0.676	229	66	-85470
0.67667	230	68	-85450
0.67733	230	69	-85430
0.678	231	70	-85420
0.67867	233	72	-85410
0.67933	234	74	-85410
0.68	235	75	-85410
0.68067	236	75	-85420
0.68133	239	73	-85420
0.682	241	71	-85410
0.68267	243	68	-85400
0.68333	244	65	-85370
0.684	244	62	-85360
0.68467	244	59	-85360
0.68533	245	57	-85360
0.686	245	54	-85350
0.68667	247	50	-85340
0.68733	250	47	-85310
0.688	252	46	-85280
0.68867	254	45	-85240
0.68933	255	44	-85190
0.69	256	44	-85140
0.69067	257	44	-85090
0.69133	256	42	-85040
0.692	256	40	-84990
0.69267	254	38	-84930
0.69333	253	36	-84880
0.694	251	34	-84830
0.69467	249	32	-84780
0.69533	247	30	-84730
0.696	246	28	-84680
0.69667	244	26	-84640
0.69733	243	24	-84580
0.698	243	22	-84550
0.69867	243	21	-84510
0.69933	244	19	-84480
0.7	244	19	-84450
0.70067	245	20	-84430
0.70133	245	22	-84400
0.702	245	24	-84360
0.70267	244	25	-84330
0.70333	243	26	-84310
0.704	241	26	-84290
0.70467	239	26	-84270
0.70533	236	26	-84240
0.706	233	25	-84220
0.70667	229	25	-84210
0.70733	226	26	-84200
0.708	222	28	-84210
0.70867	219	30	-84200
0.70933	217	32	-84200
0.71	215	34	-84200
0.71067	214	36	-84200
0.71133	214	39	-84190
0.712	214	42	-84200
0.71267	214	44	-84200
0.71333	214	47	-84210
0.714	215	49	-84200
0.71467	217	51	-84190
0.71533	218	53	-84170
0.716	220	55	-84150
0.71667	220	57	-84140
0.71733	220	59	-84120
0.718	220	61	-84090
0.71867	221	62	-84060
0.71933	221	63	-84020
0.72	222	65	-83980
0.72067	223	67	-83930
0.72133	225	71	-83910
0.722	227	76	-83900
0.72267	231	79	-83910
0.72333	234	81	-83910
0.724	238	84	-83900
0.72467	241	86	-83910
0.72533	242	88	-83910
0.726	244	91	-83910
0.72667	245	94	-83920
0.72733	245	96	-83940
0.728	245	98	-83960
0.72867	246	98	-83980
0.72933	247	99	-84000
0.73	248	98	-84030
0.73067	248	99	-84060
0.73133	248	99	-84100
0.732	248	100	-84120
0.73267	247	101	-84120
0.73333	249	102	-84140
0.734	249	101	-84150
0.73467	250	100	-84160
0.73533	250	99	-84170
0.736	249	97	-84180
0.73667	248	96	-84210
0.73733	247	95	-84240
0.738	244	93	-84260
0.73867	242	90	-84300
0.73933	241	87	-84350
0.74	239	85	-84400
0.74067	237	84	-84480
0.74133	236	83	-84550
0.742	237	83	-84610
0.74267	238	82	-84660
0.74333	239	81	-84710
0.744	241	79	-84770
0.74467	243	78	-84820
0.74533	245	76	-84880
0.746	247	73	-84940
0.74667	248	70	-84990
0.74733	250	65	-85020
0.748	252	60	-85070
0.74867	254	56	-85100
0.74933	256	53	-85140
0.75	258	50	-85160
0.75067	259	47	-85180
0.75133	260	43	-85190
0.752	261	39	-85190
0.75267	263	36	-85190
0.75333	265	33	-85210
0.754	266	31	-85220
0.75467	267	29	-85230
0.75533	269	28	-85220
0.756	270	27	-85200
0.75667	271	24	-85180
0.75733	272	21	-85170
0.758	273	19	-85160
0.75867	274	17	-85130
0.75933	276	15	-85090
0.76	277	13	-85060
0.76067	279	12	-85010
0.76133	281	12	-84980
0.762	283	10	-84960
0.76267	284	8	-84950
0.76333	284	5	-84930
0.764	285	2	-84920
0.76467	286	0	-84920
0.76533	288	-3	-84910
0.766	289	-5	-84900
0.76667	291	-7	-84900
0.76733	291	-8	-84890
0.768	292	-8	-84880
0.76867	293	-8	-84880
0.76933	295	-7	-84890
0.77	296	-7	-84900
0.77067	297	-7	-84900
0.77133	298	-8	-84900
0.772	298	-10	-84900
0.77267	297	-13	-84890
0.77333	297	-16	-84870
0.774	295	-19	-84860
0.77467	293	-21	-84850
0.77533	290	-21	-84840
0.776	287	-22	-84830
0.77667	284	-22	-84820
0.77733	283	-20	-84790
0.778	283	-17	-84760
0.77867	282	-16	-84730
0.77933	282	-15	-84700
0.78	282	-16	-84670
0.78067	281	-16	-84650
0.78133	280	-16	-84630
0.782	280	-15	-84610
0.78267	279	-15	-84610
0.78333	280	-14	-84600
0.784	280	-13	-84600
0.78467	280	-12	-84610
0.78533	281	-9	-84620
0.786	282	-7	-84620
0.78667	282	-3	-84620
0.78733	283	2	-84620
0.788	285	5	-84620
0.78867	286	9	-84620
0.78933	287	14	-84630
0.79	286	19	-84650
0.79067	285	24	-84680
0.79133	283	29	-84700
0.792	281	32	-84720
0.79267	279	36	-84740
0.79333	278	39	-84740
0.794	278	42	-84740
0.79467	277	43	-84730
0.79533	277	45	-84700
0.796	275	47	-84670
0.79667	273	47	-84640
0.79733	272	47	-84620
0.798	271	46	-84590
0.79867	270	44	-84570
0.79933	269	43	-84540
0.8	266	42	-84500
0.80067	264	41	-84470
0.80133	262	40	-84450
0.802	259	39	-84430
0.80267	257	39	-84410
0.80333	255	39	-84400
0.804	252	40	-84400
0.80467	248	41	-84400
0.80533	243	43	-84410
0.806	238	44	-84420
0.80667	234	46	-84420
0.80733	230	48	-84420
0.808	227	49	-84420
0.80867	224	49	-84430
0.80933	222	49	-84430
0.81	219	51	-84430
0.81067	217	53	-84460
0.81133	217	54	-84510
0.812	215	55	-84560
0.81267	213	54	-84600
0.81333	211	54	-84640
0.814	207	54	-84680
0.81467	205	54	-84710
0.81533	203	54	-84730
0.816	202	55	-84750
0.81667	200	56	-84760
0.81733	197	56	-84770
0.818	195	57	-84790
0.81867	194	57	-84800
0.81933	192	56	-84800
0.82	192	58	-84780
0.82067	190	60	-84770
0.82133	188	61	-84780
0.822	187	61	-84790
0.82267	186	60	-84790
0.82333	186	59	-84800
0.824	184	60	-84830
0.82467	183	60	-84860
0.82533	183	60	-84880
0.826	182	59	-84900
0.82667	181	59	-84900
0.82733	183	58	-84920
0.828	184	57	-84940
0.82867	187	57	-84950
0.82933	190	57	-84970
0.83	194	56	-84970
0.83067	197	55	-84980
0.83133	199	54	-85000
0.832	202	52	-85030
0.83267	203	48	-85080
0.83333	204	44	-85130
0.834	204	40	-85160
0.83467	204	36	-85170
0.83533	205	33	-85190
0.836	208	30	-85200
0.83667	210	28	-85210
0.83733	213	27	-85200
0.838	216	25	-85180
0.83867	218	23	-85170
0.83933	220	22	-85160
0.84	222	21	-85140
0.84067	223	19	-85120
0.84133	225	18	-85130
0.842	227	16	-85130
0.84267	229	14	-85120
0.84333	230	12	-85110
0.844	232	9	-85090
0.84467	235	7	-85080
0.84533	237	6	-85070
0.846	238	5	-85040
0.84667	239	5	-85020
0.84733	240	5	-84990
0.848	241	7	-84960
0.84867	243	8	-84940
0.84933	245	9	-84920
0.85	247	12	-84900
0.85067	248	13	-84880
0.85133	248	15	-84860
0.852	249	16	-84850
0.85267	249	16	-84840
0.85333	249	16	-84820
0.854	249	18	-84820
0.85467	248	19	-84820
0.85533	247	19	-84820
0.856	247	19	-84810
0.85667	247	19	-84820
0.85733	247	19	-84810
0.858	245	19	-84800
0.85867	246	18	-84780
0.85933	247	18	-84780
0.86	248	20	-84760
0.86067	248	21	-84730
0.86133	250	21	-84710
0.862	251	20	-84710
0.86267	253	19	-84720
0.86333	256	17	-84740
0.864	260	17	-84740
0.86467	263	15	-84760
0.86533	266	15	-84770
0.866	269	14	-84790
0.86667	270	14	-84820
0.86733	271	14	-84840
0.868	272	15	-84870
0.86867	274	15	-84900
0.86933	276	15	-84940
0.87	278	14	-84980
0.87067	281	12	-85020
0.87133	284	12	-85060
0.872	286	12	-85100
0.87267	287	12	-85140
0.87333	289	12	-85180
0.874	291	12	-85230
0.87467	293	12	-85290
0.87533	295	13	-85320
0.876	295	14	-85350
0.87667	294	15	-85360
0.87733	294	16	-85360
0.878	294	16	-85360
0.87867	294	17	-85340
0.87933	293	19	-85330
0.88	293	20	-85320
0.88067	293	20	-85310
0.88133	294	18	-85300
0.882	293	16	-85300
0.88267	292	15	-85300
0.88333	291	14	-85300
0.884	289	13	-85290
0.88467	286	14	-85280
0.88533	283	15	-85280
0.886	281	16	-85290
0.88667	278	17	-85320
0.88733	276	16	-85340
0.888	273	15	-85360
0.88867	271	16	-85360
0.88933	270	18	-85370
0.89	268	22	-85370
0.89067	267	25	-85390
0.89133	265	30	-85410
0.892	263	34	-85440
0.89267	260	37	-85450
0.89333	258	40	-85480
0.894	255	43	-85500
0.89467	254	45	-85530
0.89533	253	46	-85570
0.896	250	48	-85590
0.89667	249	49	-85600
0.89733	247	50	-85610
0.898	245	51	-85640
0.89867	242	52	-85670
0.89933	239	52	-85700
0.9	236	52	-85710
0.90067	233	50	-85720
0.90133	230	49	-85720
0.902	228	48	-85710
0.90267	225	48	-85730
0.90333	223	46	-85740
0.904	222	46	-85760
0.90467	221	45	-85780
0.90533	220	46	-85790
0.906	220	45	-85800
0.90667	220	45	-85800
0.90733	218	45	-85780
0.908	217	45	-85780
0.90867	218	44	-85770
0.90933	218	43	-85760
0.91	219	40	-85760
0.91067	219	37	-85760
0.91133	220	34	-85750
0.912	221	33	-85760
0.91267	221	32	-85770
0.91333	220	32	-85780
0.914	219	30	-85800
0.91467	219	30	-85820
0.91533	221	30	-85840
0.916	222	29	-85850
0.91667	222	28	-85860
0.91733	223	27	-85860
0.918	222	26	-85880
0.91867	221	24	-85880
0.91933	221	22	-85880
0.92	220	20	-85890
0.92067	219	19	-85880
0.92133	218	18	-85870
0.922	217	18	-85860
0.92267	216	18	-85860
0.92333	216	17	-85870
0.924	215	17	-85880
0.92467	214	16	-85890
0.92533	214	16	-85890
0.926	214	15	-85890
0.92667	215	13	-85900
0.92733	215	12	-85920
0.928	216	11	-85940
0.92867	216	11	-85970
0.92933	216	10	-85990
0.93	215	10	-86010
0.93067	215	9	-86030
0.93133	216	8	-86030
0.932	216	7	-86030
0.93267	216	7	-86020
0.93333	216	7	-86010
0.934	216	8	-85990
0.93467	217	8	-85970
0.93533	217	8	-85960
0.936	218	7	-85940
0.93667	219	7	-85920
0.93733	219	7	-85900
0.938	218	6	-85870
0.93867	216	5	-85850
0.93933	214	4	-85830
0.94	213	3	-85830
0.94067	212	3	-85810
0.94133	211	3	-85790
0.942	210	4	-85770
0.94267	209	5	-85760
0.94333	207	7	-85730
0.944	205	8	-85710
0.94467	204	10	-85700
0.94533	204	11	-85690
0.946	204	12	-85700
0.94667	205	14	-85710
0.94733	207	16	-85720
0.948	208	18	-85740
0.94867	210	20	-85760
0.94933	211	22	-85780
0.95	213	26	-85790
0.95067	216	31	-85810
0.95133	219	37	-85810
0.952	222	41	-85810
0.95267	225	45	-85800
0.95333	228	48	-85790
0.954	232	50	-85780
0.95467	235	52	-85760
0.95533	236	53	-85730
0.956	237	54	-85720
0.95667	237	55	-85700
0.95733	237	57	-85680
0.958	237	58	-85660
0.95867	235	59	-85640
0.95933	234	60	-85620
0.96	234	61	-85620
0.96067	233	60	-85610
0.96133	234	59	-85590
0.962	234	59	-85570
0.96267	234	60	-85580
0.96333	234	60	-85590
0.964	234	60	-85580
0.96467	234	61	-85590
0.96533	234	61	-85590
0.966	234	62	-85580
0.96667	233	61	-85600
0.96733	233	60	-85600
0.968	231	61	-85600
0.96867	230	63	-85620
0.96933	229	65	-85660
0.97	228	67	-85710
0.97067	228	68	-85750
0.97133	228	69	-85780
0.972	228	70	-85800
0.97267	229	71	-85790
0.97333	230	74	-85780
0.974	231	76	-85760
0.97467	231	78	-85750
0.97533	232	80	-85740
0.976	234	83	-85730
0.97667	235	85	-85720
0.97733	237	85	-85700
0.978	239	86	-85690
0.97867	241	87	-85660
0.97933	243	87	-85650
0.98	244	87	-85650
0.98067	245	87	-85640
0.98133	247	88	-85620
0.982	248	90	-85600
0.98267	249	93	-85570
0.98333	251	95	-85550
0.984	254	97	-85520
0.98467	258	98	-85490
0.98533	262	100	-85450
0.986	266	103	-85420
0.98667	270	104	-85390
0.98733	274	105	-85370
0.988	278	106	-85350
0.98867	282	106	-85330
0.98933	285	105	-85310
0.99	288	105	-85290
0.99067	290	104	-85270
0.99133	294	104	-85250
0.992	298	102	-85230
0.99267	301	101	-85200
0.99333	304	99	-85180
0.994	307	96	-85180
0.99467	310	93	-85190
0.99533	311	90	-85210
0.996	312	87	-85230
0.99667	313	85	-85230
0.99733	314	82	-85230
0.998	315	79	-85240
0.99867	316	74	-85240
0.99933	316	69	-85220
1	316	65	-85210
1.00067	317	59	-85200
1.00133	316	54	-85190
1.002	316	51	-85170
1.00267	316	47	-85170
1.00333	314	44	-85160
1.004	311	43	-85170
1.00467	308	43	-85170
1.00533	304	42	-85170
1.006	300	42	-85180
1.00667	296	41	-85180
1.00733	292	39	-85200
1.008	288	37	-85210
1.00867	284	36	-85240
1.00933	281	35	-85270
1.01	279	35	-85300
1.01067	277	34	-85340
1.01133	274	33	-85400
1.012	272	34	-85450
1.01267	270	36	-85500
1.01333	269	39	-85550
1.014	267	42	-85600
1.01467	264	46	-85660
1.01533	261	49	-85710
1.016	260	53	-85770
1.01667	258	56	-85820
1.01733	258	58	-85850
1.018	260	60	-85880
1.01867	261	61	-85900
1.01933	262	61	-85910
1.02	264	62	-85910
1.02067	266	61	-85900
1.02133	268	60	-85900
1.022	270	58	-85910
1.02267	272	57	-85920
1.02333	274	56	-85920
1.024	278	55	-85920
1.02467	281	54	-85910
1.02533	284	54	-85910
1.026	287	55	-85900
1.02667	290	55	-85910
1.02733	293	56	-85890
1.028	297	56	-85880
1.02867	300	56	-85880
1.02933	303	56	-85880
1.03	305	58	-85880
1.03067	306	59	-85880
1.03133	307	60	-85880
1.032	308	59	-85890
1.03267	308	58	-85890
1.03333	308	57	-85870
1.034	308	55	-85840
1.03467	310	54	-85800
1.03533	311	51	-85760
1.036	312	48	-85720
1.03667	313	46	-85690
1.03733	313	44	-85650
1.038	314	42	-85620
1.03867	313	41	-85590
1.03933	312	41	-85560
1.04	312	41	-85530
1.04067	313	40	-85510
1.04133	314	40	-85500
1.042	314	40	-85480
1.04267	315	41	-85460
1.04333	316	43	-85460
1.044	317	45	-85460
1.04467	317	46	-85460
1.04533	317	46	-85450
1.046	316	46	-85440
1.04667	314	46	-85430
1.04733	313	44	-85440
1.048	312	41	-85440
1.04867	312	39	-85440
1.04933	311	37	-85430
1.05	310	36	-85440
1.05067	309	33	-85460
1.05133	308	31	-85500
1.052	307	29	-85540
1.05267	308	27	-85580
1.05333	308	26	-85610
1.054	308	24	-85630
1.05467	308	22	-85650
1.05533	307	21	-85660
1.056	306	20	-85670
1.05667	305	17	-85680
1.05733	304	17	-85700
1.058	303	16	-85720
1.05867	303	15	-85730
1.05933	303	14	-85760
1.06	303	12	-85780
1.06067	303	9	-85800
1.06133	302	7	-85810
1.062	302	5	-85830
1.06267	302	2	-85850
1.06333	303	1	-85860
1.064	304	1	-85860
1.06467	305	3	-85850
1.06533	306	6	-85840
1.066	307	9	-85830
1.06667	308	12	-85830
1.06733	309	15	-85820
1.068	311	18	-85800
1.06867	311	20	-85780
1.06933	312	21	-85750
1.07	311	23	-85720
1.07067	310	24	-85700
1.07133	309	26	-85700
1.072	308	29	-85700
1.07267	306	30	-85700
1.07333	305	31	-85710
1.074	303	34	-85710
1.07467	302	36	-85710
1.07533	302	40	-85700
1.076	302	42	-85720
1.07667	303	45	-85750
1.07733	305	47	-85790
1.078	307	48	-85840
1.07867	308	48	-85870
1.07933	309	48	-85890
1.08	309	48	-85920
1.08067	311	47	-85930
1.08133	311	48	-85940
1.082	313	48	-85940
1.08267	315	47	-85950
1.08333	315	47	-85930
1.084	315	45	-85900
1.08467	315	42	-85860
1.08533	315	40	-85800
1.086	314	38	-85750
1.08667	313	35	-85720
1.08733	313	32	-85700
1.088	312	30	-85670
1.08867	312	28	-85630
1.08933	313	26	-85600
1.09	313	24	-85580
1.09067	312	23	-85550
1.09133	312	23	-85550
1.092	312	24	-85550
1.09267	312	26	-85540
1.09333	314	29	-85520
1.094	315	31	-85500
1.09467	317	32	-85480
1.09533	318	33	-85470
1.096	318	34	-85460
1.09667	317	35	-85440
1.09733	316	36	-85430
1.098	314	37	-85410
1.09867	312	38	-85380
1.09933	309	40	-85370
1.1	306	42	-85350
1.10067	303	44	-85340
1.10133	300	45	-85340
1.102	297	46	-85350
1.10267	295	48	-85370
1.10333	293	50	-85380
1.104	290	53	-85390
1.10467	289	55	-85380
1.10533	288	57	-85360
1.106	288	60	-85360
1.10667	287	63	-85370
1.10733	287	64	-85370
1.108	288	65	-85390
1.10867	289	65	-85410
1.10933	291	65	-85420
1.11	293	65	-85430
1.11067	295	64	-85440
1.11133	298	63	-85450
1.112	301	64	-85450
1.11267	305	64	-85450
1.11333	307	65	-85450
1.114	310	65	-85460
1.11467	312	66	-85470
1.11533	314	68	-85470
1.116	317	68	-85490
1.11667	319	68	-85500
1.11733	322	67	-85490
1.118	324	65	-85480
1.11867	327	62	-85470
1.11933	329	61	-85460
1.12	332	59	-85470
1.12067	334	58	-85490
1.12133	335	56	-85520
1.122	337	54	-85550
1.12267	338	52	-85580
1.12333	337	50	-85610
1.124	336	48	-85630
1.12467	335	46	-85640
1.12533	334	43	-85650
1.126	333	40	-85660
1.12667	331	37	-85650
1.12733	330	35	-85630
1.128	328	33	-85610
1.12867	325	31	-85600
1.12933	322	30	-85580
1.13	319	29	-85560
1.13067	316	27	-85530
1.13133	314	26	-85520
1.132	312	26	-85520
1.13267	311	26	-85530
1.13333	310	25	-85550
1.134	308	25	-85570
1.13467	306	23	-85600
1.13533	305	21	-85630
1.136	304	21	-85660
1.13667	304	20	-85690
1.13733	304	19	-85720
1.138	304	19	-85740
1.13867	303	19	-85790
1.13933	302	18	-85820
1.14	302	16	-85850
1.14067	302	16	-85870
1.14133	303	16	-85890
1.142	304	15	-85900
1.14267	304	13	-85910
1.14333	302	9	-85920
1.144	301	7	-85930
1.14467	299	3	-85930
1.14533	298	0	-85930
1.146	297	-1	-85930
1.14667	295	-3	-85940
1.14733	293	-5	-85930
1.148	291	-7	-85930
1.14867	289	-10	-85920
1.14933	287	-12	-85920
1.15	285	-13	-85930
1.15067	283	-15	-85950
1.15133	282	-16	-85950
1.152	281	-17	-85960
1.15267	279	-17	-85970
1.15333	277	-17	-85980
1.154	273	-18	-86000
1.15467	269	-18	-86010
1.15533	266	-18	-86020
1.156	263	-17	-86030
1.15667	259	-18	-86040
1.15733	256	-19	-86030
1.158	254	-20	-86020
1.15867	251	-20	-86000
1.15933	247	-19	-85980
1.16	245	-17	-85960
1.16067	242	-16	-85920
1.16133	240	-15	-85890
1.162	237	-14	-85870
1.16267	234	-12	-85850
1.16333	231	-10	-85830
1.164	228	-6	-85800
1.16467	226	-2	-85780
1.16533	226	2	-85750
1.166	224	7	-85720
1.16667	223	12	-85700
1.16733	222	17	-85690
1.168	222	22	-85700
1.16867	223	24	-85710
1.16933	222	28	-85690
1.17	221	30	-85670
1.17067	220	34	-85640
1.17133	220	38	-85630
1.172	220	41	-85630
1.17267	221	44	-85630
1.17333	221	47	-85630
1.174	222	50	-85630
1.17467	224	53	-85640
1.17533	228	54	-85660
1.176	232	56	-85690
1.17667	235	59	-85700
1.17733	238	61	-85700
1.178	241	64	-85690
1.17867	243	66	-85680
1.17933	246	69	-85690
1.18	248	72	-85710
1.18067	251	74	-85710
1.18133	254	77	-85730
1.182	256	79	-85740
1.18267	257	80	-85750
1.18333	258	81	-85750
1.184	259	83	-85750
1.18467	259	84	-85760
1.18533	258	85	-85750
1.186	256	87	-85730
1.18667	256	89	-85680
1.18733	256	90	-85630
1.188	257	90	-85590
1.18867	258	92	-85540
1.18933	259	93	-85490
1.19	259	94	-85440
1.19067	259	94	-85380
1.19133	258	92	-85310
1.192	259	90	-85260
1.19267	260	88	-85220
1.19333	261	85	-85190
1.194	262	82	-85170
1.19467	263	80	-85130
1.19533	264	78	-85100
1.196	265	76	-85080
1.19667	265	75	-85090
1.19733	266	73	-85110
1.198	266	73	-85130
1.19867	266	71	-85150
1.19933	266	70	-85190
1.2	267	69	-85250
1.20067	266	67	-85320
1.20133	266	64	-85380
1.202	266	63	-85450
1.20267	265	61	-85510
1.20333	263	58	-85560
1.204	262	56	-85590
1.20467	262	53	-85620
1.20533	261	51	-85650
1.206	259	48	-85660
1.20667	257	47	-85680
1.20733	256	45	-85700
1.208	255	43	-85730
1.20867	253	43	-85760
1.20933	252	44	-85800
1.21	250	46	-85830
1.21067	247	48	-85850
1.21133	244	49	-85860
1.212	243	48	-85860
1.21267	243	46	-85870
1.21333	243	43	-85880
1.214	243	40	-85880
1.21467	243	39	-85870
1.21533	243	38	-85870
1.216	244	36	-85850
1.21667	246	35	-85830
1.21733	246	34	-85810
1.218	246	33	-85770
1.21867	245	32	-85760
1.21933	245	31	-85750
1.22	246	31	-85740
1.22067	248	31	-85740
1.22133	251	31	-85740
1.222	253	32	-85760
1.22267	255	32	-85780
1.22333	256	32	-85820
1.224	258	31	-85870
1.22467	261	28	-85910
1.22533	264	26	-85950
1.226	267	24	-85990
1.22667	269	24	-86030
1.22733	271	25	-86070
1.228	273	24	-86120
1.22867	275	23	-86170
1.22933	276	23	-86210
1.23	277	23	-86240
1.23067	277	23	-86260
1.23133	278	25	-86290
1.232	280	27	-86310
1.23267	281	29	-86350
1.23333	285	30	-86370
1.234	288	31	-86390
1.23467	290	32	-86390
1.23533	292	32	-86400
1.236	293	32	-86410
1.23667	294	31	-86420
1.23733	293	32	-86440
1.238	292	33	-86450
1.23867	290	34	-86450
1.23933	288	35	-86460
1.24	286	37	-86460
1.24067	283	39	-86460
1.24133	279	39	-86470
1.242	275	39	-86460
1.24267	272	38	-86460
1.24333	269	37	-86470
1.244	266	38	-86470
1.24467	263	38	-86480
1.24533	261	39	-86480
1.246	259	41	-86480
1.24667	259	44	-86470
1.24733	258	46	-86470
1.248	257	48	-86490
1.24867	256	49	-86500
1.24933	256	50	-86500
1.25	254	50	-86500
1.25067	253	49	-86510
1.25133	254	49	-86510
1.252	255	48	-86520
1.25267	256	47	-86530
1.25333	256	47	-86530
1.254	255	49	-86540
1.25467	254	51	-86540
1.25533	254	54	-86540
1.256	253	57	-86510
1.25667	252	59	-86490
1.25733	251	61	-86460
1.258	248	64	-86450
1.25867	247	66	-86440
1.25933	246	70	-86440
1.26	245	73	-86420
1.26067	245	76	-86410
1.26133	245	77	-86390
1.262	245	78	-86380
1.26267	246	79	-86370
1.26333	247	80	-86350
1.264	249	79	-86340
1.26467	250	79	-86320
1.26533	252	78	-86310
1.266	253	75	-86300
1.26667	255	74	-86300
1.26733	256	73	-86300
1.268	256	71	-86310
1.26867	257	70	-86330
1.26933	258	69	-86350
1.27	259	67	-86390
1.27067	259	66	-86420
1.27133	259	63	-86450
1.272	260	60	-86480
1.27267	260	57	-86510
1.27333	261	55	-86550
1.274	263	55	-86590
1.27467	265	55	-86620
1.27533	266	57	-86660
1.276	268	58	-86710
1.27667	269	57	-86750
1.27733	270	59	-86780
1.278	272	61	-86810
1.27867	273	62	-86850
1.27933	274	63	-86880
1.28	274	65	-86900
1.28067	275	68	-86920
1.28133	276	70	-86920
1.282	277	73	-86920
1.28267	277	75	-86920
1.28333	278	77	-86930
1.284	277	79	-86920
1.28467	276	82	-86910
1.28533	274	84	-86910
1.286	271	84	-86900
1.28667	269	86	-86900
1.28733	267	89	-86900
1.288	264	91	-86900
1.28867	262	94	-86880
1.28933	260	97	-86840
1.29	258	100	-86810
1.29067	256	101	-86780
1.29133	253	103	-86740
1.292	250	103	-86690
1.29267	245	102	-86640
1.29333	242	100	-86580
1.294	238	99	-86520
1.29467	235	99	-86480
1.29533	231	98	-86430
1.296	228	98	-86380
1.29667	225	98	-86320
1.29733	223	98	-86270
1.298	222	96	-86220
1.29867	220	94	-86160
1.29933	219	93	-86110
1.3	217	92	-86080
1.30067	217	92	-86050
1.30133	218	92	-86020
1.302	220	92	-85980
1.30267	222	93	-85950
1.30333	224	95	-85930
1.304	227	96	-85900
1.30467	230	97	-85890
1.30533	235	98	-85890
1.306	240	98	-85890
1.30667	245	99	-85890
1.30733	250	99	-85880
1.308	254	99	-85880
1.30867	260	100	-85880
1.30933	266	99	-85880
1.31	270	98	-85870
1.31067	274	98	-85850
1.31133	277	98	-85830
1.312	280	98	-85820
1.31267	284	98	-85820
1.31333	289	98	-85830
1.314	293	99	-85850
1.31467	296	100	-85850
1.31533	298	101	-85850
1.316	300	101	-85870
1.31667	302	101	-85890
1.31733	302	101	-85910
1.318	303	102	-85930
1.31867	304	102	-85950
1.31933	305	102	-85950
1.32	307	102	-85940
1.32067	308	101	-85940
1.32133	310	101	-85930
1.322	311	101	-85930
1.32267	311	100	-85930
1.32333	311	100	-85920
1.324	312	101	-85920
1.32467	312	102	-85920
1.32533	312	104	-85920
1.326	311	105	-85910
1.32667	311	106	-85890
1.32733	310	106	-85860
1.328	309	106	-85830
1.32867	308	105	-85810
1.32933	306	104	-85810
1.33	304	101	-85810
1.33067	300	96	-85820
1.33133	298	92	-85860
[truncated: 5,503 more rows]
