# Supplementary material for: A novel ATP dependent dimethylsulfoniopropionate lyase in bacteria that releases dimethyl sulfide and acryloyl-CoA
Source: eLife. 2021 May 10;10:e64045. doi: 10.7554/eLife.64045 (PMC8163506; doi:10.7554/eLife.64045)
Supplement: Figure 2—source data 3. [file elife-64045-fig2-data3.xlsx]

## Sheet: Fig. 2C
Gene	Relatively transcriptional level(fold)
recA	1	1	1
1696	5.202	7.599	11.72
1697	5.006	7.431	11.12
1698	6.918	9.563	14.54
1699	5.101	6.324	10.51
