# Supplementary material for: A novel ATP dependent dimethylsulfoniopropionate lyase in bacteria that releases dimethyl sulfide and acryloyl-CoA
Source: eLife. 2021 May 10;10:e64045. doi: 10.7554/eLife.64045 (PMC8163506; doi:10.7554/eLife.64045)
Supplement: Figure 3—figure supplement 3—source data 1. [file elife-64045-fig10-data10.xlsx]

## Sheet: Fig. 3S3A
Temperature(°C)	Relative activity (%)
5	1.71841	2.66133	2.60154
10	4.05501	4.27947	5.06324
15	8.45499	12.8982	10.7796
20	19.7093	17.8262	16.7582
25	32.7703	36.6625	35.4786
30	52.8872	50.2332	51.051
35	80.6458	69.2691	62.4056
40	108.732	95.9156	95.3521
45	61.5639	47.1432	49.3289
50	6.49464	6.54892	6.69702

## Sheet: Fig. 3S3B
pH	Relative activity (%)
7.5	6.42213	3.30316	2.28736
8	81.3025	72.3765	72.3794
8.5	101.242	98.4902	100.268
9	86.9924	82.3438	95.0611
9.5	82.4308	72.739	80.9374
10	65.4768	69.8957	59.7232
10.5	20.2598	27.9738	20.9474
11	0.383626	0.252363	0.285814

## Sheet: Fig. 3S3C
ATP(mM)	V(μM/min)
0.4	5.27988
0.6	9.81553
1	14.6968
1.2	28.2695
2	36.096
3	54.0695
4	67.5882
6	79.2825
8	86.1438
10	90.9309
12	90.2461
15	90.5564
20	92.2522

## Sheet: Fig. 3S3D
CoA(mM)	V(μM/min)
0.2	35.5338
0.4	50.2015
0.6	63.0395
0.8	75.0142
1	80.6745
1.2	83.9417
1.5	88.0675
2	91.9715
2.5	93.1717
3	94.0502
4	95.5994

## Sheet: Fig. 3S3E
DMSP(mM)	V(μM/min)
0.2	34.2893
0.4	47.6945
0.6	59.2687
0.8	68.5164
1	77.7602
1.2	82.7598
2	91.3954
4	94.8392
6	96.5725
8	101.388
