# Supplementary material for: A novel ATP dependent dimethylsulfoniopropionate lyase in bacteria that releases dimethyl sulfide and acryloyl-CoA
Source: eLife. 2021 May 10;10:e64045. doi: 10.7554/eLife.64045 (PMC8163506; doi:10.7554/eLife.64045)
Supplement: Figure 3—figure supplement 5—source data 1. [file elife-64045-fig11-data11.xlsx]

## Sheet: Sheet1
	Relative activity (%)
Control (DddX)	98.8435	103.307	97.8499
1mM SA	101.05	101.7	99.6926
2mM SA	100.382	102.592	99.0331
5mM SA	103.227	103.505	98.277
1mM SP	101.558	103.293	96.5455
2mM SP	97.5113	96.0282	101.67
5mM SP	102.653	102.373	100.804
