# Supplementary material for: A novel ATP dependent dimethylsulfoniopropionate lyase in bacteria that releases dimethyl sulfide and acryloyl-CoA
Source: eLife. 2021 May 10;10:e64045. doi: 10.7554/eLife.64045 (PMC8163506; doi:10.7554/eLife.64045)
Supplement: Figure 3—figure supplement 6—source data 1. — D2 and the ΔdddX mutant on sodium acetate or sodium propionate as the sole carbon source. [file elife-64045-fig12-data12.xlsx]

## Sheet: Fig. 3S6A
	OD (600 nm)
Time (h)	Psychrobacter sp. D2			ΔdddX
0	0.049	0.049	0.05	0.05	0.05	0.047
11	0.12	0.123	0.126	0.109	0.125	0.119
22	0.331	0.32	0.324	0.31	0.311	0.308
28	0.323	0.338	0.312	0.314	0.304	0.328
34	0.339	0.327	0.325	0.319	0.31	0.31
46	0.343	0.318	0.33	0.31	0.312	0.302
52	0.334	0.318	0.328	0.3	0.308	0.316
58	0.335	0.327	0.314	0.306	0.298	0.31
70	0.32	0.321	0.334	0.322	0.322	0.306
82	0.348	0.328	0.342	0.319	0.321	0.301

## Sheet: Fig. 3S6B
	OD (600 nm)
Time (h)	Psychrobacter sp. D2			ΔdddX
0	0.04	0.044	0.041	0.035	0.042	0.044
17	0.021	0.035	0.023	0.02	0.039	0.031
29	0.059	0.069	0.051	0.064	0.045	0.054
41	0.109	0.132	0.132	0.106	0.117	0.099
53	0.161	0.15	0.175	0.154	0.132	0.15
70	0.329	0.328	0.316	0.305	0.303	0.31
76	0.398	0.404	0.39	0.365	0.355	0.36
94	0.399	0.415	0.413	0.391	0.408	0.402
100	0.418	0.422	0.405	0.424	0.399	0.4
114	0.421	0.413	0.404	0.414	0.402	0.405
124	0.393	0.404	0.404	0.414	0.401	0.389
