# Supplementary material for: A novel ATP dependent dimethylsulfoniopropionate lyase in bacteria that releases dimethyl sulfide and acryloyl-CoA
Source: eLife. 2021 May 10;10:e64045. doi: 10.7554/eLife.64045 (PMC8163506; doi:10.7554/eLife.64045)
Supplement: Figure 3—source data 1. [file elife-64045-fig3-data1.xlsx]

## Sheet: Fig.3A
	OD(600 nm)
Time(h)	Psychrobacter sp. D2			ΔdddX			ΔdddX/pBBR1MCS2-dddX			ΔdddX/pBBR1MCS2
0	0.033	0.036	0.036	0.044	0.044	0.044	0.042	0.039	0.036	0.043	0.04	0.04
12	0.044	0.045	0.045	0.044	0.043	0.045	0.064	0.063	0.063	0.041	0.041	0.029
24	0.096	0.115	0.118	0.043	0.044	0.045	0.149	0.144	0.14	0.04	0.029	0.032
36	0.301	0.353	0.339	0.044	0.043	0.045	0.343	0.328	0.314	0.042	0.032	0.036
42	0.426	0.411	0.423	0.046	0.043	0.044	0.412	0.4	0.391	0.043	0.035	0.042
48	0.411	0.424	0.434	0.045	0.046	0.046	0.415	0.406	0.397	0.039	0.032	0.04
66	0.441	0.445	0.455	0.044	0.043	0.045	0.416	0.414	0.413	0.037	0.023	0.035
72	0.447	0.448	0.461	0.044	0.039	0.042	0.43	0.425	0.421	0.041	0.033	0.043
84	0.457	0.457	0.468	0.043	0.042	0.044	0.438	0.431	0.424	0.039	0.025	0.035
96	0.444	0.443	0.458	0.041	0.041	0.045	0.438	0.435	0.425	0.037	0.023	0.034
108	0.436	0.434	0.446	0.039	0.039	0.04	0.421	0.417	0.414	0.035	0.021	0.033
120	0.43	0.42	0.439	0.038	0.036	0.038	0.407	0.403	0.399	0.036	0.022	0.032
