# Supplementary material for: A novel ATP dependent dimethylsulfoniopropionate lyase in bacteria that releases dimethyl sulfide and acryloyl-CoA
Source: eLife. 2021 May 10;10:e64045. doi: 10.7554/eLife.64045 (PMC8163506; doi:10.7554/eLife.64045)
Supplement: Figure 3—source data 2. [file elife-64045-fig3-data2.xlsx]

## Sheet: Fig. 3B
	nmol DMS min-1 mg protein-1
Psychrobacter sp. D2	46.5589	42.9184	44.9163
ΔdddX/pBBR1MCS-dddX	50.2216	57.0881	52.3429
ΔdddX	0.0561522	0.119078	-0.0267653
ΔdddX/pBBR1MCS	-0.00125093	-0.0675516	0.0544934
