# Supplementary material for: A novel ATP dependent dimethylsulfoniopropionate lyase in bacteria that releases dimethyl sulfide and acryloyl-CoA
Source: eLife. 2021 May 10;10:e64045. doi: 10.7554/eLife.64045 (PMC8163506; doi:10.7554/eLife.64045)
Supplement: Figure 3—source data 3. [file elife-64045-fig3-data3.xlsx]

## Sheet: Fig. 3C
	Intensity(μV)
Retention time(min)	DddX	Control	DMS standard
0	9	-42	43
0.00067	8.9	-39	44
0.00133	8.7	-36	44
0.002	8.6	-33	44
0.00267	8.6	-30	45
0.00333	8.6	-28	44
0.004	8.6	-26	42
0.00467	8.6	-24	41
0.00533	8.7	-23	38
0.006	9	-22	35
0.00667	9.1	-22	32
0.00733	9.1	-23	30
0.008	9.2	-23	28
0.00867	9.4	-22	24
0.00933	9.5	-20	20
0.01	9.5	-20	16
0.01067	9.6	-21	13
0.01133	9.7	-22	10
0.012	9.8	-23	7
0.01267	10.1	-24	4
0.01333	10.3	-24	0
0.014	10.6	-23	-4
0.01467	11.1	-22	-9
0.01533	11.6	-22	-13
0.016	12.2	-23	-17
0.01667	12.8	-24	-21
0.01733	13.6	-25	-26
0.018	14	-27	-31
0.01867	14.3	-29	-35
0.01933	14.5	-32	-39
0.02	14.6	-34	-42
0.02067	14.8	-35	-45
0.02133	15.1	-34	-49
0.022	15.4	-34	-53
0.02267	15.9	-32	-58
0.02333	16.4	-31	-63
0.024	16.8	-31	-66
0.02467	17.3	-31	-66
0.02533	17.7	-33	-65
0.026	18	-34	-64
0.02667	18.3	-35	-63
0.02733	18.4	-36	-62
0.028	18.6	-38	-60
0.02867	18.8	-39	-60
0.02933	19	-41	-61
0.03	19	-44	-61
0.03067	19	-47	-61
0.03133	18.9	-50	-62
0.032	18.8	-53	-64
0.03267	19	-57	-66
0.03333	19.1	-61	-67
0.034	19.2	-65	-66
0.03467	19.2	-69	-66
0.03533	19.2	-74	-65
0.036	19.1	-78	-65
0.03667	19.1	-82	-64
0.03733	19.1	-86	-63
0.038	19.1	-88	-62
0.03867	19.1	-90	-61
0.03933	19.1	-93	-60
0.04	19.1	-94	-59
0.04067	19.1	-94	-59
0.04133	19.1	-92	-58
0.042	19	-91	-59
0.04267	18.8	-90	-59
0.04333	18.6	-88	-59
0.044	18.5	-87	-59
0.04467	18.5	-86	-59
0.04533	18.7	-84	-60
0.046	18.6	-82	-61
0.04667	18.7	-81	-62
0.04733	18.7	-80	-64
0.048	18.6	-79	-64
0.04867	18.5	-80	-64
0.04933	18.5	-81	-63
0.05	18.3	-79	-62
0.05067	17.9	-76	-59
0.05133	17.5	-74	-57
0.052	17.2	-72	-55
0.05267	17	-71	-54
0.05333	17	-71	-53
0.054	17.1	-74	-54
0.05467	17.2	-76	-55
0.05533	17.2	-77	-54
0.056	17.3	-77	-54
0.05667	17.5	-78	-52
0.05733	17.7	-78	-51
0.058	18	-81	-51
0.05867	18.2	-82	-49
0.05933	18.5	-82	-47
0.06	18.8	-83	-47
0.06067	19.2	-82	-47
0.06133	19.6	-80	-46
0.062	20	-77	-45
0.06267	20.4	-76	-43
0.06333	20.5	-77	-41
0.064	20.7	-78	-38
0.06467	20.8	-79	-37
0.06533	21	-81	-37
0.066	21.1	-83	-33
0.06667	21.3	-85	-29
0.06733	21.4	-87	-26
0.068	21.4	-91	-22
0.06867	21.4	-95	-20
0.06933	21.4	-98	-19
0.07	21.5	-101	-19
0.07067	21.4	-104	-20
0.07133	21.4	-108	-20
0.072	21.2	-108	-20
0.07267	20.8	-109	-20
0.07333	20.4	-112	-20
0.074	19.9	-116	-20
0.07467	19.4	-119	-19
0.07533	18.8	-121	-17
0.076	18.2	-122	-16
0.07667	17.5	-124	-14
0.07733	17	-124	-11
0.078	16.6	-124	-8
0.07867	16.3	-125	-6
0.07933	15.9	-127	-3
0.08	15.7	-127	0
0.08067	15.6	-127	3
0.08133	15.4	-129	7
0.082	15.2	-129	10
0.08267	15	-127	14
0.08333	14.9	-127	17
0.084	15.1	-127	21
0.08467	15.3	-127	24
0.08533	15.5	-128	27
0.086	15.8	-128	29
0.08667	16.1	-127	30
0.08733	16.5	-124	30
0.088	16.9	-122	29
0.08867	17.3	-119	28
0.08933	17.7	-118	29
0.09	18.2	-118	30
0.09067	18.6	-118	30
0.09133	19.1	-117	30
0.092	19.6	-116	28
0.09267	20.1	-114	27
0.09333	20.4	-112	25
0.094	20.7	-110	23
0.09467	21.1	-106	22
0.09533	21.5	-102	23
0.096	21.7	-97	23
0.09667	21.8	-93	25
0.09733	21.8	-91	28
0.098	21.8	-87	31
0.09867	21.8	-83	32
0.09933	21.9	-80	34
0.1	22	-76	35
0.10067	22.1	-71	36
0.10133	22	-68	35
0.102	21.9	-65	36
0.10267	21.8	-61	36
0.10333	21.7	-59	37
0.104	21.6	-56	38
0.10467	21.5	-54	38
0.10533	21.4	-52	38
0.106	21.3	-51	37
0.10667	21.2	-49	35
0.10733	21	-47	33
0.108	20.8	-45	31
0.10867	20.5	-44	30
0.10933	20.3	-45	28
0.11	20.1	-46	26
0.11067	19.9	-47	24
0.11133	19.7	-47	21
0.112	19.5	-46	18
0.11267	19.3	-46	14
0.11333	19.3	-47	9
0.114	19.4	-48	6
0.11467	19.3	-48	3
0.11533	19.2	-49	1
0.116	19.3	-51	-2
0.11667	19.3	-54	-6
0.11733	19.2	-58	-8
0.118	19.1	-63	-9
0.11867	19.1	-68	-10
0.11933	19.2	-73	-11
0.12	19.4	-80	-12
0.12067	19.5	-86	-13
0.12133	19.4	-90	-13
0.122	19.2	-94	-13
0.12267	18.8	-96	-14
0.12333	18.3	-98	-15
0.124	17.6	-102	-17
0.12467	17.1	-106	-18
0.12533	16.5	-108	-18
0.126	15.9	-111	-19
0.12667	15.5	-113	-19
0.12733	15.1	-115	-20
0.128	14.8	-116	-22
0.12867	14.6	-115	-25
0.12933	14.3	-113	-28
0.13	14	-111	-32
0.13067	13.7	-111	-37
0.13133	13.4	-111	-43
0.132	13.2	-113	-48
0.13267	13.2	-115	-51
0.13333	13.1	-117	-54
0.134	12.9	-119	-55
0.13467	12.8	-120	-56
0.13533	12.7	-121	-56
0.136	12.7	-121	-57
0.13667	12.7	-121	-58
0.13733	12.7	-122	-61
0.138	12.6	-121	-64
0.13867	12.6	-120	-67
0.13933	12.4	-120	-70
0.14	12.3	-120	-72
0.14067	12.2	-120	-73
0.14133	12.1	-119	-75
0.142	12.3	-118	-75
0.14267	12.6	-115	-74
0.14333	12.8	-112	-72
0.144	12.9	-108	-70
0.14467	13	-102	-68
0.14533	13.3	-97	-67
0.146	13.4	-92	-66
0.14667	13.4	-86	-65
0.14733	13.3	-81	-64
0.148	13.1	-78	-64
0.14867	12.8	-77	-64
0.14933	12.5	-78	-64
0.15	12.2	-79	-63
0.15067	11.9	-81	-62
0.15133	11.5	-83	-62
0.152	11.3	-84	-62
0.15267	11.1	-87	-62
0.15333	10.8	-89	-63
0.154	10.4	-91	-64
0.15467	10	-92	-64
0.15533	9.9	-91	-64
0.156	10	-90	-64
0.15667	10	-88	-66
0.15733	9.9	-86	-67
0.158	10	-82	-70
0.15867	10.1	-77	-73
0.15933	10.2	-73	-76
0.16	10.4	-68	-78
0.16067	10.5	-65	-80
0.16133	10.4	-61	-81
0.162	10.3	-59	-82
0.16267	10.4	-58	-82
0.16333	10.5	-58	-82
0.164	10.8	-60	-80
0.16467	11.2	-61	-78
0.16533	11.7	-62	-76
0.166	12.2	-62	-74
0.16667	12.8	-63	-72
0.16733	13.4	-64	-70
0.168	13.9	-67	-69
0.16867	14.3	-68	-68
0.16933	14.8	-69	-68
0.17	15.2	-73	-68
0.17067	15.5	-77	-68
0.17133	15.8	-80	-67
0.172	16.1	-83	-66
0.17267	16.4	-87	-64
0.17333	16.8	-91	-62
0.174	17.2	-95	-62
0.17467	17.5	-99	-62
0.17533	17.7	-102	-63
0.176	17.8	-105	-64
0.17667	17.9	-107	-66
0.17733	18.1	-109	-69
0.178	18.4	-111	-72
0.17867	18.8	-113	-74
0.17933	19.1	-114	-76
0.18	19.5	-113	-80
0.18067	20	-113	-83
0.18133	20.3	-112	-84
0.182	20.6	-110	-85
0.18267	21	-108	-86
0.18333	21.5	-105	-86
0.184	21.8	-102	-87
0.18467	22.1	-100	-86
0.18533	22.2	-97	-83
0.186	22.3	-93	-81
0.18667	22.4	-91	-78
0.18733	22.4	-90	-75
0.188	22.3	-91	-71
0.18867	22.5	-92	-67
0.18933	22.7	-94	-62
0.19	22.6	-96	-57
0.19067	22.6	-97	-53
0.19133	22.5	-99	-50
0.192	22.4	-102	-47
0.19267	22.1	-105	-45
0.19333	21.8	-110	-43
0.194	21.6	-114	-42
0.19467	21.4	-117	-41
0.19533	21.1	-120	-41
0.196	20.8	-125	-41
0.19667	20.4	-132	-42
0.19733	20.1	-138	-43
0.198	19.9	-142	-44
0.19867	19.8	-146	-44
0.19933	19.7	-149	-45
0.2	19.6	-151	-45
0.20067	19.6	-152	-44
0.20133	19.7	-153	-44
0.202	19.9	-154	-44
0.20267	20.4	-154	-43
0.20333	20.9	-152	-43
0.204	21.3	-148	-44
0.20467	21.7	-144	-44
0.20533	22.1	-139	-43
0.206	22.4	-135	-42
0.20667	22.5	-133	-40
0.20733	22.5	-131	-40
0.208	22.5	-128	-39
0.20867	22.4	-122	-38
0.20933	22.4	-117	-38
0.21	22.2	-110	-38
0.21067	21.8	-105	-38
0.21133	21.6	-101	-39
0.212	21.4	-95	-40
0.21267	21.1	-87	-40
0.21333	20.8	-80	-40
0.214	20.4	-74	-40
0.21467	20.2	-68	-41
0.21533	19.9	-60	-43
0.216	19.7	-53	-44
0.21667	19.5	-47	-46
0.21733	19.1	-39	-47
0.218	18.8	-32	-48
0.21867	18.4	-26	-48
0.21933	17.8	-22	-47
0.22	17.3	-18	-45
0.22067	16.7	-15	-46
0.22133	16.2	-14	-46
0.222	15.6	-14	-46
0.22267	15.1	-16	-46
0.22333	14.6	-17	-45
0.224	14.2	-18	-43
0.22467	13.8	-18	-41
0.22533	13.5	-19	-38
0.226	13.4	-19	-36
0.22667	13.4	-21	-32
0.22733	13.4	-24	-29
0.228	13.4	-27	-25
0.22867	13.5	-30	-23
0.22933	13.5	-33	-21
0.23	13.7	-37	-19
0.23067	13.7	-40	-17
0.23133	14	-44	-15
0.232	14.3	-48	-13
0.23267	14.8	-51	-11
0.23333	15.3	-53	-10
0.234	15.7	-55	-8
0.23467	15.9	-53	-6
0.23533	16.2	-50	-5
0.236	16.4	-48	-2
0.23667	16.5	-45	0
0.23733	16.8	-42	1
0.238	17	-40	3
0.23867	17.1	-39	4
0.23933	17.2	-39	6
0.24	17.3	-38	6
0.24067	17.5	-37	7
0.24133	17.5	-35	8
0.242	17.5	-33	7
0.24267	17.5	-32	7
0.24333	17.7	-29	8
0.244	17.8	-26	9
0.24467	17.9	-23	10
0.24533	17.8	-19	11
0.246	17.7	-13	11
0.24667	17.6	-9	12
0.24733	17.4	-6	13
0.248	17.2	-5	14
0.24867	17.1	-4	13
0.24933	16.9	-5	16
0.25	16.9	-5	18
0.25067	16.9	-6	19
0.25133	17	-8	20
0.252	17	-10	22
0.25267	17	-12	23
0.25333	17	-15	23
0.254	17	-18	22
0.25467	16.9	-22	22
0.25533	16.8	-24	21
0.256	16.6	-26	19
0.25667	16.5	-29	18
0.25733	16.4	-32	17
0.258	16.1	-35	18
0.25867	15.8	-36	18
0.25933	15.6	-36	17
0.26	15.4	-35	17
0.26067	15.1	-34	16
0.26133	14.7	-33	15
0.262	14.4	-32	15
0.26267	14.1	-32	14
0.26333	13.9	-32	11
0.264	13.7	-33	8
0.26467	13.3	-36	6
0.26533	12.9	-40	3
0.266	12.5	-45	0
0.26667	12.2	-50	-1
0.26733	11.7	-55	-3
0.268	11.2	-61	-3
0.26867	10.6	-64	-5
0.26933	10.1	-68	-7
0.27	9.7	-72	-9
0.27067	9.3	-77	-12
0.27133	8.9	-82	-14
0.272	8.4	-87	-15
0.27267	8.1	-92	-14
0.27333	7.8	-96	-13
0.274	7.4	-100	-12
0.27467	7	-103	-12
0.27533	6.6	-106	-14
0.276	6.4	-110	-15
0.27667	6.2	-115	-18
0.27733	6	-119	-22
0.278	5.7	-122	-26
0.27867	5.5	-125	-29
0.27933	5.3	-128	-33
0.28	5.4	-132	-37
0.28067	5.5	-134	-43
0.28133	5.7	-135	-47
0.282	6	-135	-51
0.28267	6.2	-135	-54
0.28333	6.3	-135	-56
0.284	6.4	-136	-57
0.28467	6.3	-136	-56
0.28533	6.4	-135	-57
0.286	6.6	-134	-60
0.28667	6.8	-134	-62
0.28733	7.1	-133	-64
0.288	7.3	-132	-66
0.28867	7.5	-132	-69
0.28933	7.7	-133	-71
0.29	7.7	-136	-73
0.29067	7.8	-138	-74
0.29133	7.8	-137	-77
0.292	8.1	-136	-78
0.29267	8.4	-134	-79
0.29333	8.7	-131	-79
0.294	8.9	-127	-81
0.29467	9	-123	-82
0.29533	9.1	-116	-83
0.296	9.1	-109	-84
0.29667	9.1	-102	-85
0.29733	9.3	-97	-85
0.298	9.6	-93	-85
0.29867	9.8	-88	-85
0.29933	10.1	-83	-86
0.3	10.6	-80	-88
0.30067	11	-78	-90
0.30133	11.6	-76	-90
0.302	12.1	-72	-91
0.30267	12.5	-70	-91
0.30333	13	-68	-90
0.304	13.5	-66	-88
0.30467	13.9	-63	-88
0.30533	14.3	-61	-87
0.306	14.6	-58	-87
0.30667	14.8	-55	-86
0.30733	15	-51	-85
0.308	15.2	-45	-86
0.30867	15.3	-39	-86
0.30933	15.5	-33	-86
0.31	15.6	-27	-84
0.31067	15.5	-21	-81
0.31133	15.5	-17	-78
0.312	15.6	-15	-75
0.31267	15.6	-13	-72
0.31333	15.7	-13	-69
0.314	15.8	-14	-65
0.31467	15.8	-14	-62
0.31533	15.7	-15	-58
0.316	15.4	-16	-54
0.31667	15.1	-16	-50
0.31733	15	-18	-49
0.318	15	-19	-48
0.31867	14.9	-20	-46
0.31933	14.7	-20	-44
0.32	14.6	-21	-43
0.32067	14.5	-21	-41
0.32133	14.5	-20	-40
0.322	14.4	-18	-40
0.32267	14.2	-16	-38
0.32333	14.2	-13	-36
0.324	14.1	-11	-35
0.32467	14	-8	-34
0.32533	13.9	-7	-32
0.326	13.8	-7	-31
0.32667	13.7	-8	-30
0.32733	13.7	-11	-29
0.328	13.7	-12	-29
0.32867	13.8	-13	-29
0.32933	13.7	-16	-28
0.33	13.7	-18	-28
0.33067	13.7	-22	-28
0.33133	13.7	-25	-29
0.332	13.6	-29	-30
0.33267	13.6	-32	-32
0.33333	13.5	-36	-32
0.334	13.5	-40	-32
0.33467	13.4	-44	-31
0.33533	13.4	-48	-30
0.336	13.4	-54	-29
0.33667	13.4	-58	-30
0.33733	13.5	-64	-30
0.338	13.7	-69	-29
0.33867	13.9	-75	-29
0.33933	14	-79	-30
0.34	14.2	-83	-30
0.34067	14.4	-87	-30
0.34133	14.6	-90	-31
0.342	15	-92	-32
0.34267	15.4	-94	-32
0.34333	15.9	-97	-31
0.344	16.4	-101	-29
0.34467	16.8	-104	-27
0.34533	16.9	-106	-25
0.346	17	-106	-22
0.34667	16.9	-105	-18
0.34733	16.7	-104	-15
0.348	16.8	-104	-13
0.34867	16.9	-104	-12
0.34933	17.1	-104	-11
0.35	17.2	-103	-10
0.35067	17.3	-101	-10
0.35133	17.2	-97	-10
0.352	17.1	-91	-10
0.35267	16.6	-85	-9
0.35333	16	-79	-8
0.354	15.5	-72	-8
0.35467	15	-66	-7
0.35533	14.4	-59	-7
0.356	14	-51	-6
0.35667	13.7	-43	-6
0.35733	13.5	-36	-7
0.358	13.3	-29	-9
0.35867	13.1	-21	-9
0.35933	12.8	-14	-10
0.36	12.5	-8	-9
0.36067	12	-1	-9
0.36133	11.5	5	-8
0.362	11.3	11	-7
0.36267	11.1	18	-7
0.36333	11	24	-7
0.364	10.9	29	-9
0.36467	10.9	32	-11
0.36533	10.9	32	-14
0.366	10.8	32	-18
0.36667	10.8	31	-22
0.36733	10.7	31	-25
0.368	10.7	32	-29
0.36867	10.7	33	-33
0.36933	10.7	32	-37
0.37	11	32	-42
0.37067	11.2	32	-47
0.37133	11.3	30	-53
0.372	11.6	29	-58
0.37267	11.9	26	-63
0.37333	12.2	23	-68
0.374	12.5	21	-70
0.37467	12.9	18	-72
0.37533	13.3	16	-73
0.376	13.5	13	-73
0.37667	13.8	10	-73
0.37733	14	6	-72
0.378	14.2	5	-72
0.37867	14.3	6	-73
0.37933	14.4	6	-74
0.38	14.4	4	-74
0.38067	14.4	0	-72
0.38133	14.4	-2	-70
0.382	14.4	-2	-68
0.38267	14.3	-2	-67
0.38333	14.1	-2	-67
0.384	13.8	-3	-65
0.38467	13.5	-4	-64
0.38533	13.2	-5	-62
0.386	13.1	-7	-60
0.38667	12.9	-10	-58
0.38733	12.7	-14	-54
0.388	12.5	-18	-50
0.38867	12.3	-21	-47
0.38933	12.1	-24	-47
0.39	11.9	-28	-47
0.39067	11.8	-31	-47
0.39133	11.8	-33	-47
0.392	11.6	-36	-45
0.39267	11.5	-37	-44
0.39333	11.4	-38	-42
0.394	11.3	-38	-40
0.39467	11.3	-37	-36
0.39533	11.2	-39	-33
0.396	11	-41	-29
0.39667	11	-44	-27
0.39733	11	-48	-25
0.398	11	-53	-25
0.39867	11	-58	-25
0.39933	10.9	-63	-25
0.4	10.8	-67	-25
0.40067	10.8	-71	-25
0.40133	11.1	-76	-26
0.402	11.3	-79	-28
0.40267	11.5	-81	-31
0.40333	11.7	-83	-34
0.404	11.8	-85	-35
0.40467	11.9	-87	-37
0.40533	12	-88	-40
0.406	12.1	-90	-42
0.40667	12.3	-91	-46
0.40733	12.5	-90	-51
0.408	12.7	-89	-56
0.40867	12.9	-89	-58
0.40933	13.2	-90	-60
0.41	13.4	-91	-61
0.41067	13.5	-93	-63
0.41133	13.6	-93	-67
0.412	13.7	-94	-71
0.41267	13.7	-96	-75
0.41333	13.5	-98	-78
0.414	13.2	-100	-81
0.41467	13	-102	-84
0.41533	12.9	-103	-85
0.416	12.6	-104	-86
0.41667	12.4	-104	-89
0.41733	12.4	-103	-91
0.418	12.2	-101	-90
0.41867	12.1	-101	-89
0.41933	11.9	-101	-89
0.42	11.8	-102	-87
0.42067	11.6	-105	-85
0.42133	11.5	-108	-83
0.422	11.5	-111	-80
0.42267	11.6	-113	-78
0.42333	11.6	-115	-76
0.424	11.7	-117	-76
0.42467	11.7	-117	-75
0.42533	11.9	-118	-74
0.426	12.1	-118	-73
0.42667	12.3	-117	-73
0.42733	12.6	-116	-74
0.428	13	-116	-75
0.42867	13.1	-118	-75
0.42933	13.3	-119	-72
0.43	13.5	-120	-70
0.43067	13.7	-123	-69
0.43133	13.9	-126	-69
0.432	14	-129	-70
0.43267	14.2	-133	-70
0.43333	14.6	-136	-71
0.434	14.9	-138	-72
0.43467	15.4	-139	-72
0.43533	15.7	-139	-72
0.436	15.9	-138	-71
0.43667	16	-137	-68
0.43733	16.1	-135	-67
0.438	16.2	-134	-66
0.43867	16.1	-134	-62
0.43933	16.2	-132	-58
0.44	16.2	-130	-52
0.44067	16.2	-127	-46
0.44133	16.3	-124	-41
0.442	16.3	-121	-36
0.44267	16.2	-119	-31
0.44333	16.2	-117	-27
0.444	16.2	-113	-23
0.44467	16.4	-109	-20
0.44533	16.7	-105	-16
0.446	17	-100	-15
0.44667	17.4	-97	-14
0.44733	17.7	-95	-14
0.448	17.8	-92	-14
0.44867	18	-89	-14
0.44933	18.2	-86	-13
0.45	18.5	-85	-13
0.45067	18.9	-83	-14
0.45133	19.2	-80	-14
0.452	19.5	-76	-16
0.45267	19.9	-73	-17
0.45333	20.1	-69	-17
0.454	20.1	-66	-17
0.45467	20.1	-64	-17
0.45533	20.1	-62	-18
0.456	20.1	-60	-19
0.45667	20.2	-59	-21
0.45733	20.3	-58	-22
0.458	20.6	-58	-26
0.45867	20.8	-58	-31
0.45933	20.9	-57	-34
0.46	20.9	-56	-37
0.46067	20.8	-55	-39
0.46133	20.6	-56	-39
0.462	20.4	-57	-39
0.46267	20.2	-58	-39
0.46333	19.8	-58	-40
0.464	19.3	-58	-40
0.46467	18.8	-59	-40
0.46533	18.5	-61	-41
0.466	18.3	-63	-43
0.46667	18.1	-67	-46
0.46733	17.9	-71	-50
0.468	17.8	-76	-53
0.46867	17.6	-81	-55
0.46933	17.4	-87	-57
0.47	17.3	-93	-61
0.47067	17.4	-98	-64
0.47133	17.5	-102	-67
0.472	17.6	-107	-71
0.47267	17.8	-110	-74
0.47333	18	-115	-76
0.474	18.3	-119	-80
0.47467	18.4	-124	-85
0.47533	18.6	-129	-89
0.476	18.9	-135	-93
0.47667	19.1	-141	-94
0.47733	19.4	-146	-95
0.478	19.7	-151	-96
0.47867	20	-154	-97
0.47933	20.2	-155	-98
0.48	20.4	-155	-98
0.48067	20.4	-154	-99
0.48133	20.4	-153	-98
0.482	20.4	-153	-96
0.48267	20.5	-154	-95
0.48333	20.7	-153	-95
0.484	20.9	-152	-93
0.48467	21.1	-152	-91
0.48533	21.1	-151	-88
0.486	21.1	-151	-85
0.48667	21.1	-153	-81
0.48733	21.2	-154	-79
0.488	21.4	-155	-78
0.48867	21.5	-155	-76
0.48933	21.7	-155	-75
0.49	21.9	-153	-72
0.49067	22.1	-152	-69
0.49133	22.2	-149	-65
0.492	22.2	-147	-61
0.49267	22.3	-144	-58
0.49333	22.6	-141	-56
0.494	22.9	-138	-55
0.49467	23.1	-135	-53
0.49533	23.3	-131	-52
0.496	23.4	-126	-50
0.49667	23.4	-122	-49
0.49733	23.4	-117	-47
0.498	23.3	-113	-46
0.49867	23.3	-110	-44
0.49933	23.4	-107	-42
0.5	23.4	-103	-39
0.50067	23.3	-100	-36
0.50133	23.2	-98	-34
0.502	23.2	-97	-33
0.50267	23.3	-96	-32
0.50333	23.4	-95	-33
0.504	23.4	-92	-34
0.50467	23.4	-91	-34
0.50533	23.4	-90	-34
0.506	23.3	-89	-33
0.50667	23.3	-90	-31
0.50733	23.2	-92	-30
0.508	23.2	-93	-30
0.50867	23.1	-96	-32
0.50933	23.1	-100	-35
0.51	23.1	-103	-37
0.51067	23.1	-106	-40
0.51133	22.9	-108	-43
0.512	22.8	-109	-46
0.51267	22.6	-109	-50
0.51333	22.4	-107	-53
0.514	22.2	-105	-56
0.51467	21.9	-101	-59
0.51533	21.5	-97	-61
0.516	21.2	-92	-61
0.51667	20.8	-89	-60
0.51733	20.5	-87	-59
0.518	20.2	-86	-59
0.51867	19.8	-84	-59
0.51933	19.5	-83	-59
0.52	19.1	-82	-59
0.52067	18.7	-82	-58
0.52133	18.2	-82	-55
0.522	17.8	-81	-54
0.52267	17.4	-81	-52
0.52333	17.1	-81	-50
0.524	16.6	-80	-48
0.52467	16.2	-79	-47
0.52533	15.7	-80	-45
0.526	15.4	-81	-40
0.52667	15.1	-81	-35
0.52733	15.1	-82	-30
0.528	15	-82	-25
0.52867	15	-81	-19
0.52933	15	-81	-14
0.53	15	-81	-9
0.53067	15	-80	-3
0.53133	15	-79	3
0.532	15	-78	8
0.53267	15.1	-76	12
0.53333	15.2	-74	17
0.534	15.3	-71	21
0.53467	15.5	-70	24
0.53533	15.6	-70	27
0.536	15.7	-70	30
0.53667	15.8	-70	31
0.53733	15.8	-69	32
0.538	15.9	-66	33
0.53867	16	-65	34
0.53933	16.1	-64	35
0.54	16.4	-64	36
0.54067	16.7	-62	34
0.54133	16.9	-60	34
0.542	17.1	-58	36
0.54267	17.1	-55	38
0.54333	17.2	-54	41
0.544	17.5	-52	44
0.54467	17.8	-49	47
0.54533	18	-47	49
0.546	18.3	-46	52
0.54667	18.7	-45	53
0.54733	19.1	-45	53
0.548	19.4	-46	53
0.54867	19.7	-47	53
0.54933	20.2	-48	54
0.55	20.5	-49	55
0.55067	20.9	-50	57
0.55133	21.2	-49	59
0.552	21.5	-48	61
0.55267	21.7	-47	64
0.55333	21.7	-46	69
0.554	22	-46	75
0.55467	22.2	-45	80
0.55533	22.5	-43	85
0.556	22.8	-40	89
0.55667	23.2	-36	94
0.55733	23.7	-32	96
0.558	24	-27	98
0.55867	24.1	-23	99
0.55933	24.2	-19	100
0.56	24.2	-17	103
0.56067	24	-15	106
0.56133	23.8	-15	108
0.562	23.6	-16	109
0.56267	23.5	-16	110
0.56333	23.3	-19	110
0.564	23.3	-21	109
0.56467	23.1	-22	109
0.56533	22.9	-24	110
0.566	22.7	-26	110
0.56667	22.6	-27	108
0.56733	22.4	-28	107
0.568	22.1	-28	106
0.56867	21.8	-28	104
0.56933	21.4	-28	103
0.57	21.3	-27	100
0.57067	21.1	-27	97
0.57133	20.9	-27	93
0.572	20.6	-28	89
0.57267	20.3	-30	86
0.57333	20	-32	82
0.574	19.7	-33	79
0.57467	19.3	-34	78
0.57533	18.9	-34	78
0.576	18.5	-33	80
0.57667	18.2	-34	81
0.57733	17.9	-36	82
0.578	17.6	-39	83
0.57867	17.3	-40	85
0.57933	16.9	-40	87
0.58	16.5	-42	86
0.58067	16.2	-45	84
0.58133	15.9	-49	81
0.582	15.5	-53	77
0.58267	15.2	-55	73
0.58333	14.8	-57	69
0.584	14.4	-59	67
0.58467	14	-61	63
0.58533	13.4	-61	60
0.586	12.8	-59	56
0.58667	12.3	-57	52
0.58733	11.7	-56	50
0.588	11.2	-56	48
0.58867	10.8	-55	44
0.58933	10.3	-52	40
0.59	9.8	-50	36
0.59067	9.6	-48	32
0.59133	9.6	-46	28
0.592	9.6	-45	24
0.59267	9.7	-43	20
0.59333	9.9	-41	17
0.594	10.1	-41	15
0.59467	10.2	-41	12
0.59533	10.3	-39	9
0.596	10.4	-38	6
0.59667	10.8	-38	6
0.59733	11.2	-38	7
0.598	11.7	-38	9
0.59867	12	-40	9
0.59933	12.1	-42	9
0.6	12.1	-45	9
0.60067	12.2	-48	9
0.60133	12.3	-53	10
0.602	12.5	-57	9
0.60267	12.8	-61	9
0.60333	13.1	-63	9
0.604	13.5	-64	9
0.60467	14	-66	8
0.60533	14.6	-67	7
0.606	15.3	-67	6
0.60667	15.8	-68	4
0.60733	16.4	-69	1
0.608	17	-69	-1
0.60867	17.6	-69	-2
0.60933	18	-67	-2
0.61	18.4	-64	-2
0.61067	18.9	-60	-1
0.61133	19.3	-55	1
0.612	19.6	-51	3
0.61267	19.9	-48	6
0.61333	20	-45	9
0.614	20	-42	11
0.61467	20	-39	13
0.61533	20.2	-37	14
0.616	20.3	-36	15
0.61667	20.4	-36	17
0.61733	20.3	-37	20
0.618	20.1	-38	23
0.61867	19.7	-40	25
0.61933	19.4	-41	27
0.62	18.9	-43	29
0.62067	18.7	-45	31
0.62133	18.5	-46	34
0.622	18.4	-46	37
0.62267	18.2	-45	41
0.62333	18.1	-44	45
0.624	18	-43	47
0.62467	18.1	-44	49
0.62533	18	-46	49
0.626	17.8	-49	48
0.62667	17.6	-51	49
0.62733	17.5	-53	49
0.628	17.4	-57	51
0.62867	17.3	-61	52
0.62933	17.2	-65	53
0.63	17.2	-66	55
0.63067	17.3	-69	57
0.63133	17.4	-71	60
0.632	17.6	-72	61
0.63267	17.9	-73	63
0.63333	18.3	-76	64
0.634	18.6	-77	64
0.63467	19	-78	64
0.63533	19.3	-80	63
0.636	19.5	-82	65
0.63667	19.7	-84	65
0.63733	20.1	-87	65
0.638	20.7	-89	66
0.63867	21.3	-92	65
0.63933	21.9	-95	64
0.64	22.4	-100	64
0.64067	22.9	-104	64
0.64133	23.1	-108	63
0.642	23.3	-112	62
0.64267	23.5	-114	61
0.64333	23.8	-115	61
0.644	24.1	-116	61
0.64467	24.4	-116	61
0.64533	24.8	-114	61
0.646	25.1	-113	58
0.64667	25.3	-112	55
0.64733	25.4	-109	51
0.648	25.5	-105	47
0.64867	25.3	-103	44
0.64933	25	-100	41
0.65	24.7	-97	38
0.65067	24.5	-94	36
0.65133	24.2	-92	32
0.652	24	-88	26
0.65267	23.7	-83	22
0.65333	23.4	-78	17
0.654	23.2	-72	13
0.65467	23	-69	9
0.65533	22.8	-66	6
0.656	22.8	-63	3
0.65667	22.7	-61	-3
0.65733	22.7	-59	-8
0.658	22.7	-57	-13
0.65867	22.6	-54	-18
0.65933	22.5	-52	-23
0.66	22.4	-50	-26
0.66067	22.1	-47	-29
0.66133	21.8	-44	-30
0.662	21.6	-43	-31
0.66267	21.6	-42	-32
0.66333	21.6	-41	-34
0.664	21.8	-40	-36
0.66467	22	-39	-37
0.66533	22.1	-40	-38
0.666	22.2	-42	-39
0.66667	22.3	-44	-39
0.66733	22.3	-45	-39
0.668	22.4	-45	-39
0.66867	22.4	-44	-40
0.66933	22.3	-43	-42
0.67	22.2	-42	-43
0.67067	22.1	-42	-43
0.67133	22.1	-43	-43
0.672	22.2	-43	-42
0.67267	22.3	-43	-40
0.67333	22.3	-44	-39
0.674	22.2	-45	-37
0.67467	22.1	-45	-35
0.67533	22.2	-44	-33
0.676	22.1	-44	-32
0.67667	22	-44	-31
0.67733	21.9	-45	-29
0.678	21.9	-46	-28
0.67867	21.8	-49	-27
0.67933	21.6	-52	-26
0.68	21.4	-55	-25
0.68067	21.3	-58	-24
0.68133	21.2	-62	-22
0.682	21.2	-66	-20
0.68267	21.2	-70	-19
0.68333	21.2	-73	-19
0.684	21.3	-74	-18
0.68467	21.4	-73	-15
0.68533	21.4	-72	-13
0.686	21.3	-70	-12
0.68667	21.1	-69	-12
0.68733	20.7	-68	-12
0.688	20.4	-66	-11
0.68867	20	-64	-11
0.68933	19.8	-62	-9
0.69	19.6	-59	-9
0.69067	19.6	-56	-8
0.69133	19.7	-52	-7
0.692	19.9	-48	-8
0.69267	19.9	-44	-8
0.69333	20	-42	-9
0.694	19.9	-39	-9
0.69467	19.7	-37	-9
0.69533	19.6	-34	-8
0.696	19.4	-30	-8
0.69667	19.2	-26	-7
0.69733	18.9	-24	-6
0.698	18.5	-23	-5
0.69867	18.2	-21	-5
0.69933	18	-18	-5
0.7	17.8	-15	-3
0.70067	17.6	-12	0
0.70133	17.3	-8	3
0.702	16.9	-4	4
0.70267	16.7	-1	4
0.70333	16.6	2	5
0.704	16.4	5	5
0.70467	16.2	10	4
0.70533	15.8	15	2
0.706	15.4	18	-1
0.70667	14.9	22	-3
0.70733	14.5	26	-5
0.708	14.3	29	-6
0.70867	14	32	-7
0.70933	13.7	35	-8
0.71	13.5	40	-9
0.71067	13.3	45	-10
0.71133	13	50	-10
0.712	12.8	54	-13
0.71267	12.6	57	-16
0.71333	12.6	60	-20
0.714	12.7	64	-25
0.71467	13	67	-29
0.71533	13.3	70	-35
0.716	13.6	72	-41
0.71667	13.9	75	-48
0.71733	14.2	76	-54
0.718	14.5	78	-60
0.71867	14.8	79	-66
0.71933	15.1	79	-71
0.72	15.3	79	-74
0.72067	15.6	79	-77
0.72133	16	78	-79
0.722	16.4	78	-81
0.72267	17	78	-82
0.72333	17.6	77	-82
0.724	18.2	76	-81
0.72467	18.4	75	-82
0.72533	18.6	74	-81
0.726	18.6	74	-81
0.72667	18.6	74	-82
0.72733	18.5	72	-82
0.728	18.3	70	-80
0.72867	18.2	68	-78
0.72933	18.4	67	-76
0.73	18.5	64	-75
0.73067	18.7	59	-74
0.73133	18.8	53	-74
0.732	18.8	46	-71
0.73267	18.8	38	-68
0.73333	18.9	30	-65
0.734	19.1	23	-62
0.73467	19.3	13	-59
0.73533	19.4	6	-56
0.736	19.6	-2	-53
0.73667	19.7	-8	-49
0.73733	19.7	-15	-47
0.738	19.8	-20	-45
0.73867	19.9	-26	-41
0.73933	20	-30	-40
0.74	20.1	-34	-38
0.74067	20.2	-38	-36
0.74133	20.5	-43	-34
0.742	20.8	-48	-33
0.74267	21.2	-54	-33
0.74333	21.5	-62	-32
0.744	21.7	-69	-31
0.74467	22.1	-75	-30
0.74533	22.3	-81	-28
0.746	22.6	-86	-26
0.74667	22.8	-90	-24
0.74733	23	-93	-23
0.748	23.4	-96	-20
0.74867	23.8	-99	-17
0.74933	24.2	-104	-15
0.75	24.6	-109	-11
0.75067	25	-112	-10
0.75133	25.3	-112	-10
0.752	25.4	-113	-10
0.75267	25.6	-115	-9
0.75333	25.9	-117	-8
0.754	26.3	-119	-7
0.75467	26.6	-120	-5
0.75533	27	-121	-5
0.756	27.3	-122	-5
0.75667	27.7	-120	-6
0.75733	28.1	-119	-5
0.758	28.3	-120	-4
0.75867	28.4	-121	-4
0.75933	28.6	-122	-3
0.76	28.6	-124	-4
0.76067	28.5	-125	-6
0.76133	28.3	-124	-7
0.762	28.3	-124	-7
0.76267	28.2	-126	-7
0.76333	28.1	-127	-6
0.764	28.1	-127	-5
0.76467	28	-126	-3
0.76533	28	-126	-1
0.766	28.1	-129	0
0.76667	28.1	-133	1
0.76733	28.2	-137	1
0.768	28.4	-140	2
0.76867	28.6	-143	2
0.76933	28.7	-146	5
0.77	28.6	-148	8
0.77067	28.5	-148	10
0.77133	28.4	-148	13
0.772	28.4	-146	15
0.77267	28.5	-143	17
0.77333	28.5	-140	17
0.774	28.3	-138	17
0.77467	28	-135	16
0.77533	27.7	-134	15
0.776	27.4	-133	14
0.77667	26.9	-131	13
0.77733	26.3	-129	13
0.778	25.7	-125	14
0.77867	25.3	-122	14
0.77933	24.9	-119	16
0.78	24.7	-115	18
0.78067	24.8	-112	19
0.78133	24.7	-109	21
0.782	24.6	-107	22
0.78267	24.6	-106	22
0.78333	24.7	-104	22
0.784	24.7	-102	23
0.78467	24.8	-100	23
0.78533	24.9	-98	26
0.786	24.7	-96	28
0.78667	24.4	-95	30
0.78733	24.1	-95	32
0.788	23.8	-93	34
0.78867	23.5	-90	36
0.78933	23.2	-87	39
0.79	22.9	-83	42
0.79067	22.6	-78	45
0.79133	22.6	-73	46
0.792	22.5	-69	49
0.79267	22.4	-65	52
0.79333	22.4	-62	55
0.794	22.3	-59	55
0.79467	22.4	-58	57
0.79533	22.4	-57	59
0.796	22.4	-56	62
0.79667	22.4	-55	65
0.79733	22.3	-53	67
0.798	22.2	-52	70
0.79867	22	-51	73
0.79933	21.9	-48	76
0.8	21.7	-46	80
0.80067	21.7	-43	83
0.80133	21.8	-39	85
0.802	21.8	-38	86
0.80267	21.8	-36	87
0.80333	21.8	-34	87
0.804	21.8	-32	88
0.80467	21.7	-32	88
0.80533	21.5	-33	87
0.806	21.4	-35	87
0.80667	21.1	-37	88
0.80733	20.8	-38	88
0.808	20.5	-40	88
0.80867	20.3	-42	88
0.80933	20.3	-43	87
0.81	20.4	-42	86
0.81067	20.5	-42	84
0.81133	20.5	-43	83
0.812	20.4	-43	83
0.81267	20.2	-42	83
0.81333	20.1	-41	83
0.814	20	-41	81
0.81467	19.9	-42	80
0.81533	19.8	-43	78
0.816	19.6	-44	78
0.81667	19.4	-47	78
0.81733	19.1	-48	76
0.818	18.7	-50	74
0.81867	18.2	-50	70
0.81933	17.8	-50	69
0.82	17.5	-51	68
0.82067	17.3	-50	68
0.82133	16.9	-50	67
0.822	16.5	-52	66
0.82267	16.2	-55	66
0.82333	15.9	-59	66
0.824	15.7	-63	67
0.82467	15.7	-67	67
0.82533	15.6	-70	66
0.826	15.6	-74	66
0.82667	15.7	-76	65
0.82733	15.9	-81	62
0.828	16	-85	57
0.82867	16.2	-89	53
0.82933	16.4	-94	48
0.83	16.4	-98	44
0.83067	16.4	-102	39
0.83133	16.4	-106	33
0.832	16.3	-110	27
0.83267	16.2	-115	22
0.83333	16.2	-118	16
0.834	16.1	-120	10
0.83467	16	-121	4
0.83533	15.9	-120	0
0.836	15.9	-119	-4
0.83667	15.9	-118	-8
0.83733	15.7	-116	-13
0.838	15.5	-114	-17
0.83867	15.4	-113	-19
0.83933	15.2	-113	-21
0.84	15.1	-112	-24
0.84067	15	-111	-28
0.84133	14.9	-110	-31
0.842	14.9	-108	-34
0.84267	14.9	-106	-38
0.84333	14.9	-105	-42
0.844	14.8	-105	-45
0.84467	14.7	-108	-49
0.84533	14.6	-109	-52
0.846	14.5	-110	-54
0.84667	14.4	-110	-56
0.84733	14.4	-110	-57
0.848	14.3	-110	-58
0.84867	14.3	-110	-60
0.84933	14.3	-108	-62
0.85	14.1	-107	-63
0.85067	13.9	-105	-62
0.85133	13.7	-104	-61
0.852	13.5	-102	-61
0.85267	13.3	-102	-61
0.85333	13	-102	-63
0.854	12.8	-103	-67
0.85467	12.6	-102	-68
0.85533	12.6	-102	-68
0.856	12.7	-101	-69
0.85667	12.7	-99	-72
0.85733	12.7	-96	-74
0.858	12.9	-93	-76
0.85867	13.1	-90	-79
0.85933	13.3	-88	-81
0.86	13.3	-87	-84
0.86067	13.1	-85	-86
0.86133	12.9	-84	-90
0.862	12.6	-85	-92
0.86267	12.4	-86	-92
0.86333	12.1	-89	-91
0.864	11.8	-92	-92
0.86467	11.7	-95	-93
0.86533	11.6	-97	-95
0.866	11.5	-97	-96
0.86667	11.5	-96	-97
0.86733	11.7	-95	-99
0.868	11.8	-93	-100
0.86867	12.1	-89	-101
0.86933	12.6	-86	-103
0.87	13.1	-82	-104
0.87067	13.6	-78	-104
0.87133	14.1	-75	-105
0.872	14.5	-73	-106
0.87267	14.9	-71	-109
0.87333	15.3	-68	-109
0.874	15.8	-63	-110
0.87467	16.2	-59	-110
0.87533	16.7	-55	-109
0.876	17.1	-52	-106
0.87667	17.6	-49	-103
0.87733	18	-46	-101
0.878	18.4	-44	-98
0.87867	18.8	-42	-95
0.87933	19.1	-43	-90
0.88	19.4	-43	-84
0.88067	19.7	-42	-78
0.88133	19.8	-40	-73
0.882	19.9	-39	-70
0.88267	19.9	-39	-67
0.88333	20	-38	-63
0.884	20.1	-37	-60
0.88467	20.2	-37	-59
0.88533	20.1	-37	-57
0.886	20.2	-37	-55
0.88667	20.1	-35	-53
0.88733	20.2	-33	-49
0.888	20.3	-31	-45
0.88867	20.5	-28	-40
0.88933	20.7	-28	-35
0.89	20.9	-27	-31
0.89067	21.1	-28	-28
0.89133	21.3	-30	-26
0.892	21.4	-31	-23
0.89267	21.5	-33	-19
0.89333	21.8	-34	-16
0.894	22.2	-35	-12
0.89467	22.7	-37	-7
0.89533	23.1	-41	-2
0.896	23.5	-44	2
0.89667	23.9	-47	7
0.89733	24.3	-50	12
0.898	24.6	-53	17
0.89867	24.9	-56	21
0.89933	25.3	-58	24
0.9	25.7	-61	26
0.90067	26.2	-64	27
0.90133	26.6	-66	28
0.902	27	-68	29
0.90267	27.4	-72	31
0.90333	27.7	-76	35
0.904	27.9	-81	37
0.90467	28	-85	40
0.90533	27.9	-89	43
0.906	27.8	-93	46
0.90667	27.7	-96	49
0.90733	27.5	-99	52
0.908	27.5	-101	54
0.90867	27.4	-102	57
0.90933	27.4	-103	60
0.91	27.5	-104	62
0.91067	27.7	-105	64
0.91133	27.7	-106	65
0.912	27.6	-106	66
0.91267	27.4	-105	66
0.91333	27.3	-105	64
0.914	27	-104	63
0.91467	26.7	-104	60
0.91533	26.2	-104	56
0.916	25.6	-103	51
0.91667	25.1	-101	47
0.91733	24.6	-96	44
0.918	24.3	-92	42
0.91867	24.1	-88	39
0.91933	23.9	-85	36
0.92	23.8	-81	32
0.92067	23.7	-78	32
0.92133	23.6	-75	30
0.922	23.4	-72	28
0.92267	23.3	-70	25
0.92333	23.1	-66	23
0.924	22.8	-62	22
0.92467	22.4	-59	23
0.92533	22.1	-56	22
0.926	21.9	-54	22
0.92667	21.8	-52	24
0.92733	21.7	-50	26
0.928	21.6	-49	28
0.92867	21.7	-48	29
0.92933	21.8	-46	30
0.93	22	-46	32
0.93067	22.2	-47	34
0.93133	22.2	-49	36
0.932	22.2	-50	39
0.93267	22.1	-51	40
0.93333	22.1	-52	42
0.934	22.2	-52	44
0.93467	22.2	-51	44
0.93533	22.4	-51	44
0.936	22.5	-51	41
0.93667	22.6	-51	39
0.93733	22.6	-50	36
0.938	22.5	-51	34
0.93867	22.3	-52	33
0.93933	22.2	-53	33
0.94	21.9	-53	34
0.94067	21.8	-53	33
0.94133	21.6	-53	30
0.942	21.5	-53	26
0.94267	21.5	-54	23
0.94333	21.8	-56	21
0.944	22.2	-58	19
0.94467	22.4	-61	15
0.94533	22.5	-64	12
0.946	22.8	-67	8
0.94667	23	-69	5
0.94733	23.4	-71	3
0.948	23.9	-73	0
0.94867	24.5	-75	-1
0.94933	24.9	-77	-3
0.95	25.3	-79	-4
0.95067	25.6	-80	-4
0.95133	25.9	-81	-5
0.952	26.1	-83	-4
0.95267	26.2	-85	-3
0.95333	26.4	-86	-5
0.954	26.4	-86	-8
0.95467	26.5	-87	-11
0.95533	26.6	-87	-14
0.956	26.7	-88	-17
0.95667	26.6	-89	-16
0.95733	26.5	-91	-13
0.958	26.3	-94	-10
0.95867	26.1	-97	-7
0.95933	26	-98	-6
0.96	25.9	-99	-5
0.96067	25.7	-102	-4
0.96133	25.5	-105	-2
0.962	25.4	-109	0
0.96267	25.1	-113	3
0.96333	24.8	-117	6
0.964	24.6	-122	10
0.96467	24.6	-125	13
0.96533	24.7	-128	14
0.966	24.6	-129	15
0.96667	24.5	-133	16
0.96733	24.4	-134	17
0.968	24.4	-134	18
0.96867	24.3	-134	21
0.96933	24.2	-134	25
0.97	24	-133	30
0.97067	23.9	-132	34
0.97133	23.8	-132	38
0.972	23.6	-131	42
0.97267	23.3	-131	46
0.97333	23.1	-129	48
0.974	23	-127	52
0.97467	22.8	-123	55
0.97533	22.8	-120	57
0.976	22.7	-117	61
0.97667	22.6	-113	65
0.97733	22.2	-109	67
0.978	21.9	-107	69
0.97867	21.6	-104	71
0.97933	21.2	-101	72
0.98	20.8	-98	74
0.98067	20.6	-98	77
0.98133	20.5	-97	82
0.982	20.3	-96	87
0.98267	20.1	-97	90
0.98333	20	-97	93
0.984	20.1	-96	96
0.98467	20.3	-95	99
0.98533	20.4	-95	102
0.986	20.5	-95	104
0.98667	20.5	-95	105
0.98733	20.4	-95	105
0.988	20.4	-95	104
0.98867	20.3	-96	103
0.98933	20.3	-95	101
0.99	20.5	-93	99
0.99067	20.8	-92	95
0.99133	21.1	-90	91
0.992	21.4	-88	86
0.99267	21.6	-86	83
0.99333	21.6	-84	79
0.994	21.5	-83	76
0.99467	21.5	-83	73
0.99533	21.5	-82	70
0.996	21.5	-81	68
0.99667	21.5	-80	65
0.99733	21.6	-79	61
0.998	21.8	-77	57
0.99867	22	-74	51
0.99933	22.5	-72	44
1	23	-69	36
1.00067	23.6	-67	28
1.00133	24	-64	20
1.002	24.5	-60	11
1.00267	24.8	-56	3
1.00333	24.9	-54	-5
1.004	25.1	-52	-13
1.00467	25.4	-50	-20
1.00533	25.8	-48	-25
1.006	26.2	-47	-32
1.00667	26.5	-48	-38
1.00733	26.8	-50	-45
1.008	27.1	-50	-51
1.00867	27.6	-51	-55
1.00933	27.9	-51	-57
1.01	28.2	-51	-55
1.01067	28.4	-52	-52
1.01133	28.6	-53	-50
1.012	28.6	-52	-50
1.01267	28.6	-51	-51
1.01333	28.5	-49	-51
1.014	28.5	-46	-53
1.01467	28.6	-44	-54
1.01533	28.5	-41	-55
1.016	28.4	-39	-55
1.01667	28.3	-37	-57
1.01733	28.1	-35	-59
1.018	27.9	-35	-60
1.01867	27.7	-35	-59
1.01933	27.4	-34	-59
1.02	27	-34	-59
1.02067	26.5	-34	-59
1.02133	26.1	-35	-61
1.022	25.7	-35	-61
1.02267	25.3	-36	-60
1.02333	24.8	-37	-58
1.024	24.4	-39	-56
1.02467	24.1	-42	-54
1.02533	23.9	-45	-54
1.026	23.7	-48	-52
1.02667	23.5	-51	-50
1.02733	23.2	-53	-49
1.028	23	-54	-49
1.02867	22.9	-54	-51
1.02933	23	-56	-53
1.03	23.1	-58	-54
1.03067	23.1	-60	-55
1.03133	23.1	-62	-57
1.032	23	-62	-60
1.03267	22.8	-64	-64
1.03333	22.8	-66	-67
1.034	22.9	-66	-70
1.03467	23	-66	-72
1.03533	23	-63	-74
1.036	23.1	-60	-74
1.03667	23.2	-57	-74
1.03733	23.3	-54	-72
1.038	23.4	-53	-68
1.03867	23.7	-53	-64
1.03933	24.1	-52	-60
1.04	24.6	-53	-55
1.04067	25	-52	-50
1.04133	25.1	-52	-44
1.042	25.1	-53	-40
1.04267	25	-53	-36
1.04333	24.9	-55	-32
1.044	25.1	-56	-29
1.04467	25.2	-57	-26
1.04533	25.3	-57	-26
1.046	25.5	-56	-24
1.04667	25.7	-55	-22
1.04733	25.7	-54	-20
1.048	25.9	-54	-18
1.04867	26	-55	-16
1.04933	26	-56	-15
1.05	25.9	-56	-13
1.05067	25.9	-56	-12
1.05133	25.7	-57	-11
1.052	25.6	-57	-11
1.05267	25.6	-57	-10
1.05333	25.7	-58	-11
1.054	26	-58	-14
1.05467	26.3	-58	-17
1.05533	26.4	-58	-20
1.056	26.6	-58	-22
1.05667	26.8	-57	-24
1.05733	26.8	-56	-28
1.058	26.8	-53	-32
1.05867	26.6	-51	-35
1.05933	26.5	-51	-39
1.06	26.2	-49	-41
1.06067	25.8	-47	-43
1.06133	25.4	-44	-46
1.062	24.9	-42	-49
1.06267	24.4	-38	-51
1.06333	24.1	-35	-52
1.064	23.7	-30	-54
1.06467	23.1	-27	-57
1.06533	22.7	-25	-59
1.066	22.4	-22	-62
1.06667	22.2	-22	-64
1.06733	21.9	-23	-66
1.068	21.6	-23	-69
1.06867	21.3	-23	-72
1.06933	21.2	-23	-73
1.07	21.1	-24	-77
1.07067	21.2	-25	-81
1.07133	21.3	-27	-85
1.072	21.5	-30	-89
1.07267	21.7	-32	-91
1.07333	22	-34	-93
1.074	22.3	-37	-94
1.07467	22.4	-41	-94
1.07533	22.5	-44	-92
1.076	22.5	-47	-90
1.07667	22.3	-52	-87
1.07733	22.2	-57	-84
1.078	22.1	-61	-83
1.07867	21.9	-65	-81
1.07933	21.6	-70	-80
1.08	21.4	-76	-79
1.08067	21.2	-81	-77
1.08133	21.2	-85	-76
1.082	21.3	-87	-75
1.08267	21.4	-91	-74
1.08333	21.3	-96	-74
1.084	21.2	-102	-73
1.08467	21.1	-107	-71
1.08533	21.2	-114	-68
1.086	21.3	-122	-66
1.08667	21.3	-129	-65
1.08733	21.4	-135	-66
1.088	21.7	-139	-64
1.08867	21.9	-143	-62
1.08933	22.1	-146	-59
1.09	22.3	-148	-56
1.09067	22.4	-150	-53
1.09133	22.5	-152	-50
1.092	22.4	-152	-47
1.09267	22.4	-151	-43
1.09333	22.5	-150	-41
1.094	22.6	-149	-40
1.09467	22.7	-147	-40
1.09533	22.9	-146	-39
1.096	23	-144	-35
1.09667	23.1	-141	-31
1.09733	23.4	-139	-26
1.098	23.6	-139	-23
1.09867	23.7	-138	-20
1.09933	23.5	-138	-17
1.1	23.3	-139	-14
1.10067	23.1	-140	-11
1.10133	23	-141	-8
1.102	23.2	-143	-6
1.10267	23.2	-146	-5
1.10333	23.4	-148	-3
1.104	23.5	-150	-1
1.10467	23.6	-152	1
1.10533	23.7	-153	3
1.106	23.8	-155	6
1.10667	23.9	-155	8
1.10733	23.8	-154	12
1.108	23.8	-153	16
1.10867	23.7	-152	21
1.10933	23.5	-151	25
1.11	23.2	-148	29
1.11067	22.9	-147	30
1.11133	22.6	-146	31
1.112	22.2	-146	32
1.11267	22	-147	33
1.11333	21.9	-145	33
1.114	21.8	-143	34
1.11467	21.8	-140	35
1.11533	21.6	-138	37
1.116	21.5	-137	40
1.11667	21.3	-135	42
1.11733	21.2	-134	44
1.118	21	-134	46
1.11867	20.8	-133	47
1.11933	20.5	-133	48
1.12	20.3	-134	48
1.12067	20	-133	48
1.12133	19.8	-132	45
1.122	19.6	-131	42
1.12267	19.6	-130	40
1.12333	19.7	-128	37
1.124	19.8	-127	33
1.12467	19.8	-125	29
1.12533	19.9	-123	25
1.126	19.9	-120	20
1.12667	19.8	-118	16
1.12733	19.8	-117	13
1.128	19.8	-116	10
1.12867	19.9	-117	7
1.12933	20	-118	4
1.13	20	-119	3
1.13067	20	-118	3
1.13133	20.3	-117	2
1.132	20.5	-117	0
1.13267	20.6	-118	-1
1.13333	20.6	-119	-2
1.134	20.8	-120	-2
1.13467	21.1	-120	-3
1.13533	21.5	-119	-4
1.136	21.9	-119	-3
1.13667	22.3	-119	-2
1.13733	22.6	-119	-2
1.138	22.8	-120	-1
1.13867	23	-121	1
1.13933	23.1	-123	3
1.14	23.3	-126	3
1.14067	23.5	-127	4
1.14133	23.8	-128	6
1.142	23.9	-128	8
1.14267	24	-128	9
1.14333	24.2	-129	7
1.144	24.4	-131	4
1.14467	24.7	-130	0
1.14533	25.2	-129	-4
1.146	25.6	-128	-8
1.14667	26	-128	-12
1.14733	26.5	-128	-16
1.148	27.1	-127	-20
1.14867	27.7	-125	-23
1.14933	28.1	-123	-27
1.15	28.4	-121	-31
1.15067	28.9	-118	-32
1.15133	29.1	-116	-33
1.152	29.3	-114	-34
1.15267	29.5	-110	-36
1.15333	29.7	-105	-38
1.154	29.8	-102	-39
1.15467	29.7	-99	-39
1.15533	29.6	-97	-38
1.156	29.5	-95	-36
1.15667	29.4	-95	-33
1.15733	29.4	-96	-31
1.158	29.3	-96	-27
1.15867	29.1	-99	-24
1.15933	28.8	-103	-19
1.16	28.8	-106	-16
1.16067	28.8	-108	-13
1.16133	28.8	-110	-10
1.162	28.7	-112	-8
1.16267	28.6	-114	-6
1.16333	28.5	-114	-3
1.164	28.2	-116	-1
1.16467	27.9	-119	0
1.16533	27.6	-120	0
1.166	27.3	-121	1
1.16667	27.1	-121	4
1.16733	26.9	-122	7
1.168	26.7	-124	11
1.16867	26.4	-125	13
1.16933	26.1	-126	13
1.17	25.9	-126	13
1.17067	25.5	-125	13
1.17133	25.2	-124	13
1.172	25	-122	14
1.17267	24.8	-122	13
1.17333	24.7	-121	12
1.174	24.6	-121	10
1.17467	24.5	-122	10
1.17533	24.6	-124	11
1.176	24.5	-126	13
1.17667	24.5	-128	13
1.17733	24.5	-131	13
1.178	24.5	-133	11
1.17867	24.5	-135	9
1.17933	24.6	-135	6
1.18	24.6	-135	3
1.18067	24.9	-135	1
1.18133	25.2	-135	0
1.182	25.6	-135	-2
1.18267	25.8	-134	-5
1.18333	26	-134	-7
1.184	26.1	-132	-10
1.18467	26.2	-129	-14
1.18533	26.2	-126	-18
1.186	26.2	-124	-22
1.18667	26.2	-122	-24
1.18733	26.2	-118	-25
1.188	26.2	-115	-25
1.18867	26.3	-113	-25
1.18933	26.3	-110	-27
1.19	26.3	-108	-26
1.19067	26.3	-105	-25
1.19133	26.3	-103	-23
1.192	26.2	-100	-19
1.19267	26.1	-100	-15
1.19333	25.8	-99	-11
1.194	25.4	-98	-8
1.19467	24.9	-97	-4
1.19533	24.4	-98	0
1.196	23.8	-97	4
1.19667	23.2	-95	7
1.19733	22.7	-92	10
1.198	22.2	-88	13
1.19867	21.8	-87	15
1.19933	21.6	-87	16
1.2	21.3	-87	18
1.20067	20.9	-89	18
1.20133	20.5	-91	19
1.202	20.2	-92	18
1.20267	19.9	-93	18
1.20333	19.5	-96	19
1.204	18.9	-100	21
1.20467	18.4	-103	22
1.20533	17.8	-105	24
1.206	17.3	-107	25
1.20667	16.9	-109	26
1.20733	16.4	-110	27
1.208	16	-111	28
1.20867	15.7	-112	27
1.20933	15.3	-111	27
1.21	14.9	-109	27
1.21067	14.6	-106	26
1.21133	14.2	-105	24
1.212	13.9	-104	22
1.21267	13.7	-103	21
1.21333	13.5	-103	22
1.214	13.4	-104	23
1.21467	13.6	-104	22
1.21533	13.9	-105	19
1.216	14.3	-107	16
1.21667	14.6	-110	13
1.21733	15.1	-113	11
1.218	15.6	-117	9
1.21867	16.1	-119	6
1.21933	16.6	-121	4
1.22	17.1	-123	1
1.22067	17.7	-124	-2
1.22133	18.2	-125	-5
1.222	18.6	-127	-7
1.22267	18.9	-129	-9
1.22333	19.2	-131	-13
1.224	19.5	-133	-18
1.22467	19.9	-134	-23
1.22533	20.2	-136	-28
1.226	20.4	-136	-31
1.22667	20.4	-136	-32
1.22733	20.5	-136	-35
1.228	20.6	-138	-37
1.22867	20.7	-139	-40
1.22933	20.7	-140	-41
1.23	20.6	-140	-43
1.23067	20.5	-141	-46
1.23133	20.5	-141	-49
1.232	20.4	-143	-52
1.23267	20.2	-144	-54
1.23333	20.1	-145	-53
1.234	20.2	-146	-50
1.23467	20.2	-146	-47
1.23533	20.2	-146	-43
1.236	20.3	-146	-38
1.23667	20.3	-146	-34
1.23733	20.3	-145	-30
1.238	20.2	-145	-27
1.23867	20	-146	-25
1.23933	19.9	-147	-23
1.24	19.8	-147	-20
1.24067	19.7	-148	-17
1.24133	19.6	-149	-15
1.242	19.6	-149	-11
1.24267	19.6	-148	-8
1.24333	19.8	-146	-5
1.244	19.8	-145	-3
1.24467	19.8	-144	-1
1.24533	19.9	-141	0
1.246	19.9	-140	2
1.24667	20	-141	3
1.24733	20.1	-142	3
1.248	20.3	-146	2
1.24867	20.5	-150	1
1.24933	20.6	-154	0
1.25	20.7	-159	-3
1.25067	20.8	-163	-4
1.25133	20.9	-168	-6
1.252	20.9	-174	-7
1.25267	21	-180	-8
1.25333	21.1	-184	-9
1.254	21.3	-188	-10
1.25467	21.4	-190	-11
1.25533	21.4	-193	-10
1.256	21.6	-195	-9
1.25667	21.8	-198	-8
1.25733	22.1	-200	-9
1.258	22.3	-202	-8
1.25867	22.5	-206	-7
1.25933	22.5	-208	-6
1.26	22.6	-210	-4
1.26067	22.8	-212	-3
1.26133	23.1	-213	0
1.262	23.3	-213	2
1.26267	23.3	-213	4
1.26333	23.2	-210	6
1.264	23	-207	7
1.26467	22.7	-204	7
1.26533	22.4	-200	7
1.266	22.1	-196	8
1.26667	22	-190	8
1.26733	21.8	-184	7
1.268	21.7	-176	4
1.26867	21.6	-169	1
1.26933	21.5	-162	-4
1.27	21.4	-156	-9
1.27067	21.2	-149	-13
1.27133	21	-142	-17
1.272	20.7	-135	-19
1.27267	20.4	-130	-20
1.27333	20.2	-125	-20
1.274	20	-121	-20
1.27467	19.9	-118	-20
1.27533	19.6	-114	-20
1.276	19.5	-112	-22
1.27667	19.2	-110	-23
1.27733	19	-108	-25
1.278	18.9	-108	-28
1.27867	18.9	-106	-31
1.27933	18.9	-104	-31
1.28	18.8	-101	-32
1.28067	18.8	-99	-34
1.28133	18.6	-97	-35
1.282	18.4	-95	-36
1.28267	18.2	-92	-36
1.28333	17.9	-89	-35
1.284	17.8	-86	-34
1.28467	17.7	-83	-34
1.28533	17.8	-78	-35
1.286	18	-73	-35
1.28667	18.2	-68	-35
1.28733	18.4	-61	-35
1.288	18.4	-56	-34
1.28867	18.5	-52	-33
1.28933	18.5	-46	-31
1.29	18.6	-41	-30
1.29067	18.7	-37	-29
1.29133	18.9	-32	-28
1.292	19	-30	-26
1.29267	19.1	-28	-25
1.29333	19	-28	-24
1.294	18.8	-28	-24
1.29467	18.6	-30	-24
1.29533	18.3	-35	-23
1.296	18.2	-41	-22
1.29667	18.1	-48	-21
1.29733	18.1	-54	-20
1.298	18.1	-61	-19
1.29867	18.3	-67	-19
1.29933	18.4	-73	-20
1.3	18.5	-76	-21
1.30067	18.7	-79	-22
1.30133	18.9	-82	-23
1.302	19.2	-87	-23
1.30267	19.3	-92	-23
1.30333	19.3	-97	-23
1.304	19.2	-103	-22
1.30467	19	-107	-23
1.30533	18.8	-110	-24
1.306	18.7	-112	-25
1.30667	18.6	-113	-26
1.30733	18.6	-114	-26
1.308	18.5	-117	-25
1.30867	18.4	-120	-23
1.30933	18.3	-124	-21
1.31	18.2	-126	-21
1.31067	18.2	-129	-22
1.31133	18.2	-131	-23
1.312	18.1	-133	-22
1.31267	17.8	-134	-22
1.31333	17.6	-134	-20
1.314	17.4	-133	-19
1.31467	17.2	-131	-17
1.31533	17	-129	-15
1.316	16.9	-126	-11
1.31667	16.6	-125	-8
1.31733	16.5	-123	-6
1.318	16.3	-122	-4
1.31867	16.3	-121	-2
1.31933	16.3	-121	-1
1.32	16.3	-120	0
1.32067	16.3	-119	1
1.32133	16.1	-119	2
1.322	15.9	-119	4
1.32267	15.8	-121	5
1.32333	15.8	-124	5
1.324	15.7	-127	6
1.32467	15.5	-130	7
1.32533	15.5	-133	8
1.326	15.5	-135	7
1.32667	15.4	-138	4
1.32733	15.4	-140	0
1.328	15.3	-142	-3
1.32867	15.2	-143	-7
1.32933	15.1	-143	-11
1.33	15.1	-143	-11
1.33067	15.1	-143	-10
1.33133	15.2	-144	-7
[truncated: 5,503 more rows]
