# Supplementary material for: A novel ATP dependent dimethylsulfoniopropionate lyase in bacteria that releases dimethyl sulfide and acryloyl-CoA
Source: eLife. 2021 May 10;10:e64045. doi: 10.7554/eLife.64045 (PMC8163506; doi:10.7554/eLife.64045)
Supplement: Figure 3—source data 4. [file elife-64045-fig3-data4.xlsx]

## Sheet: Fig. 3D
	Absorbance(mAU)
Retention time(min)	DddX	Control
0	0	0
0.01067	0	0
0.02133	0	0
0.032	0	0
0.04267	0	0
0.05333	0	0
0.064	0	0
0.07467	0	0
0.08533	0	0
0.096	0	0
0.10667	-0.003	-0.002
0.11733	-0.005	-0.005
0.128	-0.002	-0.004
0.13867	-0.003	0.003
0.14933	-0.001	0.006
0.16	-0.003	0
0.17067	-0.006	0.006
0.18133	0	0.004
0.192	0.005	0.004
0.20267	0	0.003
0.21333	0	0.009
0.224	0.011	0.009
0.23467	0.01	0.002
0.24533	0.01	0.009
0.256	0.014	0.011
0.26667	0.009	0.012
0.27733	0.006	0.016
0.288	0.01	0.014
0.29867	0.01	0.017
0.30933	0.018	0.024
0.32	0.011	0.026
0.33067	0.015	0.022
0.34133	0.017	0.02
0.352	0.022	0.019
0.36267	0.021	0.017
0.37333	0.022	0.025
0.384	0.023	0.03
0.39467	0.029	0.032
0.40533	0.028	0.027
0.416	0.03	0.024
0.42667	0.033	0.028
0.43733	0.035	0.034
0.448	0.037	0.034
0.45867	0.038	0.036
0.46933	0.033	0.03
0.48	0.034	0.033
0.49067	0.032	0.032
0.50133	0.029	0.034
0.512	0.037	0.037
0.52267	0.044	0.035
0.53333	0.045	0.039
0.544	0.049	0.039
0.55467	0.046	0.037
0.56533	0.046	0.042
0.576	0.05	0.042
0.58667	0.05	0.05
0.59733	0.054	0.048
0.608	0.052	0.044
0.61867	0.048	0.045
0.62933	0.05	0.043
0.64	0.046	0.042
0.65067	0.046	0.05
0.66133	0.052	0.05
0.672	0.052	0.046
0.68267	0.054	0.048
0.69333	0.046	0.049
0.704	0.048	0.051
0.71467	0.053	0.052
0.72533	0.053	0.05
0.736	0.051	0.056
0.74667	0.054	0.053
0.75733	0.051	0.05
0.768	0.055	0.055
0.77867	0.052	0.057
0.78933	0.058	0.061
0.8	0.059	0.062
0.81067	0.053	0.061
0.82133	0.054	0.059
0.832	0.055	0.058
0.84267	0.06	0.06
0.85333	0.054	0.064
0.864	0.06	0.059
0.87467	0.06	0.061
0.88533	0.064	0.06
0.896	0.061	0.062
0.90667	0.067	0.061
0.91733	0.062	0.059
0.928	0.061	0.065
0.93867	0.067	0.063
0.94933	0.07	0.068
0.96	0.059	0.073
0.97067	0.066	0.073
0.98133	0.066	0.071
0.992	0.064	0.071
1.00267	0.065	0.077
1.01333	0.064	0.075
1.024	0.064	0.071
1.03467	0.064	0.069
1.04533	0.063	0.073
1.056	0.066	0.073
1.06667	0.072	0.079
1.07733	0.065	0.081
1.088	0.061	0.072
1.09867	0.059	0.073
1.10933	0.067	0.076
1.12	0.063	0.076
1.13067	0.067	0.073
1.14133	0.068	0.07
1.152	0.065	0.074
1.16267	0.063	0.079
1.17333	0.062	0.082
1.184	0.066	0.081
1.19467	0.068	0.078
1.20533	0.069	0.075
1.216	0.065	0.077
1.22667	0.065	0.086
1.23733	0.068	0.083
1.248	0.069	0.079
1.25867	0.068	0.076
1.26933	0.073	0.072
1.28	0.069	0.078
1.29067	0.077	0.077
1.30133	0.074	0.073
1.312	0.072	0.078
1.32267	0.075	0.075
1.33333	0.078	0.073
1.344	0.077	0.082
1.35467	0.075	0.087
1.36533	0.073	0.086
1.376	0.071	0.083
1.38667	0.075	0.083
1.39733	0.076	0.084
1.408	0.084	0.081
1.41867	0.08	0.085
1.42933	0.08	0.085
1.44	0.086	0.081
1.45067	0.083	0.08
1.46133	0.082	0.078
1.472	0.082	0.079
1.48267	0.082	0.078
1.49333	0.084	0.081
1.504	0.084	0.082
1.51467	0.079	0.084
1.52533	0.079	0.079
1.536	0.08	0.085
1.54667	0.085	0.081
1.55733	0.081	0.082
1.568	0.081	0.087
1.57867	0.081	0.086
1.58933	0.084	0.089
1.6	0.087	0.083
1.61067	0.08	0.09
1.62133	0.087	0.089
1.632	0.08	0.082
1.64267	0.086	0.077
1.65333	0.079	0.085
1.664	0.083	0.084
1.67467	0.086	0.085
1.68533	0.083	0.084
1.696	0.082	0.086
1.70667	0.089	0.091
1.71733	0.084	0.09
1.728	0.084	0.084
1.73867	0.087	0.084
1.74933	0.079	0.083
1.76	0.08	0.088
1.77067	0.085	0.089
1.78133	0.088	0.09
1.792	0.088	0.085
1.80267	0.087	0.083
1.81333	0.086	0.082
1.824	0.087	0.085
1.83467	0.085	0.083
1.84533	0.084	0.085
1.856	0.081	0.083
1.86667	0.09	0.077
1.87733	0.089	0.082
1.888	0.086	0.086
1.89867	0.092	0.083
1.90933	0.085	0.077
1.92	0.087	0.082
1.93067	0.088	0.082
1.94133	0.088	0.089
1.952	0.093	0.087
1.96267	0.095	0.091
1.97333	0.092	0.087
1.984	0.091	0.088
1.99467	0.089	0.086
2.00533	0.09	0.086
2.016	0.09	0.088
2.02667	0.093	0.087
2.03733	0.096	0.087
2.048	0.095	0.089
2.05867	0.093	0.088
2.06933	0.09	0.082
2.08	0.091	0.088
2.09067	0.089	0.083
2.10133	0.093	0.085
2.112	0.096	0.084
2.12267	0.094	0.085
2.13333	0.095	0.09
2.144	0.094	0.091
2.15467	0.097	0.089
2.16533	0.09	0.082
2.176	0.092	0.094
2.18667	0.092	0.087
2.19733	0.092	0.091
2.208	0.093	0.095
2.21867	0.096	0.096
2.22933	0.099	0.092
2.24	0.097	0.092
2.25067	0.099	0.093
2.26133	0.097	0.092
2.272	0.099	0.087
2.28267	0.11	0.09
2.29333	0.116	0.087
2.304	0.124	0.085
2.31467	0.131	0.09
2.32533	0.142	0.094
2.336	0.147	0.099
2.34667	0.157	0.093
2.35733	0.157	0.093
2.368	0.166	0.099
2.37867	0.17	0.105
2.38933	0.162	0.101
2.4	0.157	0.107
2.41067	0.153	0.11
2.42133	0.133	0.111
2.432	0.129	0.101
2.44267	0.131	0.107
2.45333	0.129	0.116
2.464	0.123	0.126
2.47467	0.127	0.146
2.48533	0.144	0.151
2.496	0.157	0.163
2.50667	0.16	0.163
2.51733	0.147	0.144
2.528	0.128	0.127
2.53867	0.086	0.084
2.54933	0.023	0.029
2.56	-0.052	-0.039
2.57067	-0.125	-0.1
2.58133	-0.155	-0.137
2.592	-0.128	-0.111
2.60267	-0.046	-0.033
2.61333	0.068	0.073
2.624	0.116	0.123
2.63467	0.053	0.069
2.64533	-0.008	0.026
2.656	0.066	0.11
2.66667	0.253	0.298
2.67733	0.464	0.477
2.688	0.631	0.617
2.69867	0.735	0.662
2.70933	0.736	0.602
2.72	0.618	0.455
2.73067	0.44	0.295
2.74133	0.258	0.177
2.752	0.151	0.13
2.76267	0.112	0.114
2.77333	0.132	0.139
2.784	0.159	0.177
2.79467	0.189	0.201
2.80533	0.214	0.22
2.816	0.231	0.246
2.82667	0.261	0.265
2.83733	0.285	0.276
2.848	0.297	0.283
2.85867	0.291	0.271
2.86933	0.278	0.251
2.88	0.258	0.233
2.89067	0.249	0.22
2.90133	0.239	0.207
2.912	0.23	0.197
2.92267	0.224	0.189
2.93333	0.208	0.179
2.944	0.205	0.18
2.95467	0.202	0.18
2.96533	0.198	0.17
2.976	0.187	0.168
2.98667	0.185	0.163
2.99733	0.181	0.161
3.008	0.178	0.162
3.01867	0.179	0.157
3.02933	0.179	0.166
3.04	0.177	0.163
3.05067	0.181	0.167
3.06133	0.191	0.179
3.072	0.201	0.194
3.08267	0.23	0.227
3.09333	0.256	0.261
3.104	0.297	0.298
3.11467	0.325	0.326
3.12533	0.352	0.34
3.136	0.351	0.337
3.14667	0.339	0.317
3.15733	0.306	0.29
3.168	0.275	0.256
3.17867	0.247	0.227
3.18933	0.228	0.203
3.2	0.205	0.188
3.21067	0.187	0.173
3.22133	0.182	0.166
3.232	0.178	0.166
3.24267	0.18	0.163
3.25333	0.179	0.163
3.264	0.179	0.163
3.27467	0.184	0.172
3.28533	0.197	0.18
3.296	0.21	0.195
3.30667	0.222	0.219
3.31733	0.245	0.233
3.328	0.267	0.246
3.33867	0.29	0.256
3.34933	0.294	0.254
3.36	0.293	0.247
3.37067	0.273	0.227
3.38133	0.266	0.211
3.392	0.248	0.21
3.40267	0.226	0.21
3.41333	0.214	0.207
3.424	0.199	0.21
3.43467	0.195	0.215
3.44533	0.188	0.218
3.456	0.187	0.227
3.46667	0.183	0.239
3.47733	0.19	0.252
3.488	0.201	0.272
3.49867	0.221	0.295
3.50933	0.235	0.316
3.52	0.257	0.343
3.53067	0.284	0.382
3.54133	0.306	0.416
3.552	0.34	0.45
3.56267	0.374	0.488
3.57333	0.396	0.52
3.584	0.421	0.548
3.59467	0.448	0.571
3.60533	0.46	0.593
3.616	0.465	0.602
3.62667	0.481	0.616
3.63733	0.503	0.624
3.648	0.522	0.637
3.65867	0.54	0.657
3.66933	0.565	0.679
3.68	0.583	0.698
3.69067	0.602	0.712
3.70133	0.63	0.735
3.712	0.655	0.751
3.72267	0.679	0.775
3.73333	0.71	0.791
3.744	0.729	0.807
3.75467	0.751	0.821
3.76533	0.773	0.835
3.776	0.791	0.845
3.78667	0.815	0.867
3.79733	0.829	0.883
3.808	0.841	0.904
3.81867	0.859	0.916
3.82933	0.879	0.934
3.84	0.905	0.948
3.85067	0.926	0.961
3.86133	0.945	0.98
3.872	0.954	0.999
3.88267	0.966	1.014
3.89333	0.987	1.029
3.904	1.009	1.053
3.91467	1.031	1.062
3.92533	1.053	1.086
3.936	1.068	1.101
3.94667	1.088	1.116
3.95733	1.109	1.132
3.968	1.129	1.148
3.97867	1.149	1.166
3.98933	1.167	1.184
4	1.188	1.199
4.01067	1.206	1.216
4.02133	1.22	1.23
4.032	1.242	1.252
4.04267	1.269	1.269
4.05333	1.281	1.297
4.064	1.304	1.317
4.07467	1.319	1.338
4.08533	1.333	1.362
4.096	1.357	1.384
4.10667	1.383	1.414
4.11733	1.398	1.435
4.128	1.425	1.474
4.13867	1.45	1.496
4.14933	1.47	1.52
4.16	1.493	1.544
4.17067	1.515	1.559
4.18133	1.532	1.57
4.192	1.545	1.581
4.20267	1.553	1.593
4.21333	1.56	1.6
4.224	1.561	1.598
4.23467	1.562	1.59
4.24533	1.561	1.592
4.256	1.559	1.588
4.26667	1.557	1.589
4.27733	1.551	1.592
4.288	1.555	1.59
4.29867	1.557	1.589
4.30933	1.561	1.594
4.32	1.562	1.602
4.33067	1.568	1.609
4.34133	1.574	1.621
4.352	1.581	1.638
4.36267	1.592	1.657
4.37333	1.596	1.694
4.384	1.609	1.794
4.39467	1.627	1.987
4.40533	1.664	2.401
4.416	1.726	3.212
4.42667	1.847	4.709
4.43733	2.077	7.209
4.448	2.516	10.998
4.45867	3.291	16.238
4.46933	4.538	22.931
4.48	6.459	30.937
4.49067	9.208	39.957
4.50133	12.878	49.748
4.512	17.505	60.144
4.52267	23.071	71.121
4.53333	29.535	82.828
4.544	36.78	95.565
4.55467	44.63	109.754
4.56533	52.853	125.844
4.576	61.147	144.16
4.58667	69.149	164.687
4.59733	76.424	186.395
4.608	82.474	206.858
4.61867	86.806	222.642
4.62933	89.13	230.859
4.64	89.542	230.794
4.65067	88.44	224.014
4.66133	86.38	213.273
4.672	83.903	201.201
4.68267	81.398	189.706
4.69333	79.095	179.8
4.704	77.059	171.757
4.71467	75.285	165.416
4.72533	73.726	160.445
4.736	72.311	156.459
4.74667	70.987	153.127
4.75733	69.701	150.203
4.768	68.41	147.513
4.77867	67.087	144.917
4.78933	65.695	142.362
4.8	64.232	139.76
4.81067	62.681	137.099
4.82133	61.025	134.352
4.832	59.276	131.526
4.84267	57.436	128.626
4.85333	55.516	125.642
4.864	53.522	122.64
4.87467	51.467	119.601
4.88533	49.386	116.558
4.896	47.297	113.537
4.90667	45.217	110.552
4.91733	43.168	107.638
4.928	41.16	104.785
4.93867	39.228	102.033
4.94933	37.374	99.381
4.96	35.6	96.826
4.97067	33.931	94.38
4.98133	32.35	92.042
4.992	30.876	89.812
5.00267	29.505	87.682
5.01333	28.229	85.644
5.024	27.048	83.704
5.03467	25.955	81.865
5.04533	24.948	80.103
5.056	24.018	78.416
5.06667	23.149	76.775
5.07733	22.345	75.204
5.088	21.606	73.658
5.09867	20.924	72.15
5.10933	20.3	70.667
5.12	19.762	69.213
5.13067	19.324	67.773
5.14133	19.042	66.357
5.152	18.995	64.956
5.16267	19.345	63.566
5.17333	20.322	62.193
5.184	22.211	60.843
5.19467	25.371	59.523
5.20533	30.119	58.232
5.216	36.624	56.985
5.22667	44.844	55.805
5.23733	54.444	54.697
5.248	64.86	53.666
5.25867	75.317	52.709
5.26933	85.029	51.836
5.28	93.351	51.022
5.29067	99.864	50.263
5.30133	104.451	49.543
5.312	107.247	48.845
5.32267	108.639	48.161
5.33333	109.168	47.496
5.344	109.447	46.841
5.35467	110.11	46.213
5.36533	111.653	45.625
5.376	114.377	45.083
5.38667	118.334	44.623
5.39733	123.282	44.221
5.408	128.825	43.886
5.41867	134.502	43.598
5.42933	139.79	43.349
5.44	144.165	43.111
5.45067	147.139	42.841
5.46133	148.546	42.421
5.472	148.951	41.7
5.48267	149.472	40.569
5.49333	151.108	39.138
5.504	154.308	37.671
5.51467	159.099	36.445
5.52533	165.003	35.655
5.536	171.208	35.421
5.54667	176.936	35.701
5.55733	181.639	36.376
5.568	185.053	37.249
5.57867	187.147	38.158
5.58933	188.128	39.014
5.6	188.307	39.826
5.61067	187.974	40.696
5.62133	187.101	41.69
5.632	185.371	42.802
5.64267	182.437	43.93
5.65333	178.002	44.935
5.664	171.958	45.689
5.67467	164.416	46.083
5.68533	155.655	46.098
5.696	146.117	45.754
5.70667	136.31	45.102
5.71733	126.586	44.22
5.728	117.223	43.186
5.73867	108.385	42.054
5.74933	100.163	40.848
5.76	92.554	39.613
5.77067	85.576	38.364
5.78133	79.195	37.117
5.792	73.36	35.873
5.80267	68.031	34.65
5.81333	63.181	33.437
5.824	58.745	32.246
5.83467	54.699	31.087
5.84533	51.006	29.959
5.856	47.626	28.861
5.86667	44.518	27.788
5.87733	41.659	26.74
5.888	39.036	25.735
5.89867	36.625	24.76
5.90933	34.395	23.821
5.92	32.331	22.903
5.93067	30.427	22.018
5.94133	28.668	21.172
5.952	27.029	20.36
5.96267	25.513	19.573
5.97333	24.106	18.815
5.984	22.803	18.087
5.99467	21.583	17.384
6.00533	20.461	16.711
6.016	19.415	16.075
6.02667	18.437	15.463
6.03733	17.528	14.88
6.048	16.684	14.322
6.05867	15.906	13.796
6.06933	15.189	13.295
6.08	14.517	12.824
6.09067	13.894	12.381
6.10133	13.316	11.969
6.112	12.764	11.573
6.12267	12.249	11.19
6.13333	11.755	10.833
6.144	11.28	10.492
6.15467	10.832	10.156
6.16533	10.393	9.831
6.176	9.973	9.514
6.18667	9.567	9.196
6.19733	9.176	8.888
6.208	8.799	8.588
6.21867	8.442	8.294
6.22933	8.102	8.023
6.24	7.778	7.751
6.25067	7.478	7.491
6.26133	7.188	7.24
6.272	6.927	7.007
6.28267	6.682	6.792
6.29333	6.442	6.586
6.304	6.222	6.389
6.31467	6.014	6.202
6.32533	5.807	6.024
6.336	5.614	5.867
6.34667	5.435	5.697
6.35733	5.264	5.545
6.368	5.097	5.398
6.37867	4.945	5.264
6.38933	4.801	5.137
6.4	4.656	5.008
6.41067	4.523	4.881
6.42133	4.393	4.768
6.432	4.271	4.653
6.44267	4.155	4.543
6.45333	4.041	4.444
6.464	3.932	4.344
6.47467	3.833	4.255
6.48533	3.737	4.164
6.496	3.646	4.075
6.50667	3.551	3.997
6.51733	3.475	3.913
6.528	3.397	3.832
6.53867	3.32	3.754
6.54933	3.248	3.687
6.56	3.184	3.618
6.57067	3.112	3.551
6.58133	3.034	3.491
6.592	2.981	3.427
6.60267	2.918	3.36
6.61333	2.856	3.304
6.624	2.791	3.24
6.63467	2.738	3.18
6.64533	2.683	3.119
6.656	2.628	3.058
6.66667	2.573	3.008
6.67733	2.522	2.955
6.688	2.474	2.9
6.69867	2.422	2.849
6.70933	2.38	2.8
6.72	2.333	2.754
6.73067	2.282	2.715
6.74133	2.249	2.663
6.752	2.213	2.613
6.76267	2.175	2.585
6.77333	2.137	2.551
6.784	2.099	2.506
6.79467	2.064	2.464
6.80533	2.031	2.433
6.816	1.996	2.394
6.82667	1.966	2.365
6.83733	1.939	2.329
6.848	1.907	2.294
6.85867	1.877	2.262
6.86933	1.851	2.239
6.88	1.828	2.211
6.89067	1.8	2.179
6.90133	1.778	2.147
6.912	1.757	2.124
6.92267	1.734	2.096
6.93333	1.709	2.074
6.944	1.691	2.046
6.95467	1.671	2.027
6.96533	1.653	2.001
6.976	1.634	1.978
6.98667	1.618	1.951
6.99733	1.6	1.935
7.008	1.584	1.917
7.01867	1.568	1.89
7.02933	1.557	1.873
7.04	1.541	1.857
7.05067	1.515	1.841
7.06133	1.495	1.814
7.072	1.483	1.791
7.08267	1.474	1.771
7.09333	1.464	1.757
7.104	1.451	1.743
7.11467	1.435	1.727
7.12533	1.429	1.714
7.136	1.418	1.701
7.14667	1.411	1.687
7.15733	1.403	1.672
7.168	1.396	1.661
7.17867	1.385	1.647
7.18933	1.377	1.636
7.2	1.372	1.626
7.21067	1.358	1.615
7.22133	1.357	1.608
7.232	1.35	1.595
7.24267	1.339	1.583
7.25333	1.337	1.574
7.264	1.323	1.57
7.27467	1.307	1.553
7.28533	1.3	1.54
7.296	1.293	1.531
7.30667	1.284	1.525
7.31733	1.277	1.509
7.328	1.268	1.501
7.33867	1.254	1.493
7.34933	1.25	1.484
7.36	1.25	1.472
7.37067	1.24	1.464
7.38133	1.228	1.456
7.392	1.224	1.449
7.40267	1.217	1.444
7.41333	1.22	1.438
7.424	1.21	1.432
7.43467	1.204	1.429
7.44533	1.209	1.419
7.456	1.21	1.417
7.46667	1.205	1.419
7.47733	1.198	1.405
7.488	1.193	1.404
7.49867	1.2	1.409
7.50933	1.196	1.406
7.52	1.197	1.405
7.53067	1.197	1.4
7.54133	1.202	1.397
7.552	1.209	1.397
7.56267	1.217	1.399
7.57333	1.218	1.4
7.584	1.23	1.397
7.59467	1.241	1.404
7.60533	1.253	1.41
7.616	1.262	1.42
7.62667	1.263	1.426
7.63733	1.269	1.436
7.648	1.282	1.441
7.65867	1.281	1.445
7.66933	1.282	1.445
7.68	1.279	1.443
7.69067	1.269	1.437
7.70133	1.263	1.431
7.712	1.258	1.427
7.72267	1.243	1.415
7.73333	1.232	1.409
7.744	1.225	1.399
7.75467	1.209	1.394
7.76533	1.203	1.386
7.776	1.201	1.372
7.78667	1.2	1.365
7.79733	1.215	1.36
7.808	1.224	1.348
7.81867	1.241	1.341
7.82933	1.257	1.342
7.84	1.267	1.342
7.85067	1.269	1.338
7.86133	1.259	1.332
7.872	1.249	1.315
7.88267	1.232	1.296
7.89333	1.215	1.269
7.904	1.189	1.242
7.91467	1.164	1.221
7.92533	1.145	1.201
7.936	1.125	1.184
7.94667	1.111	1.173
7.95733	1.1	1.17
7.968	1.105	1.16
7.97867	1.113	1.165
7.98933	1.141	1.179
8	1.199	1.207
8.01067	1.274	1.255
8.02133	1.389	1.331
8.032	1.53	1.43
8.04267	1.697	1.557
8.05333	1.879	1.703
8.064	2.051	1.852
8.07467	2.212	2.005
8.08533	2.331	2.145
8.096	2.402	2.264
8.10667	2.435	2.337
8.11733	2.408	2.368
8.128	2.336	2.365
8.13867	2.231	2.316
8.14933	2.106	2.24
8.16	1.972	2.132
8.17067	1.846	2.009
8.18133	1.726	1.895
8.192	1.638	1.774
8.20267	1.622	1.669
8.21333	1.762	1.575
8.224	2.239	1.522
8.23467	3.264	1.524
8.24533	5.126	1.616
8.256	7.933	1.867
8.26667	11.499	2.307
8.27733	15.262	2.902
8.288	18.41	3.569
8.29867	20.258	4.168
8.30933	20.436	4.56
8.32	19.021	4.647
8.33067	16.465	4.443
8.34133	13.345	3.992
8.352	10.246	3.428
8.36267	7.537	2.845
8.37333	5.415	2.332
8.384	3.882	1.933
8.39467	2.848	1.655
8.40533	2.194	1.467
8.416	1.823	1.351
8.42667	1.636	1.301
8.43733	1.593	1.319
8.448	1.683	1.41
8.45867	1.885	1.573
8.46933	2.172	1.827
8.48	2.497	2.145
8.49067	2.822	2.498
8.50133	3.086	2.84
8.512	3.27	3.13
8.52267	3.372	3.326
8.53333	3.35	3.434
8.544	3.247	3.444
8.55467	3.07	3.348
8.56533	2.835	3.174
8.576	2.576	2.936
8.58667	2.324	2.681
8.59733	2.093	2.417
8.608	1.928	2.194
8.61867	1.878	2.038
8.62933	2	2.008
8.64	2.311	2.153
8.65067	2.787	2.5
8.66133	3.293	2.969
8.672	3.704	3.446
8.68267	3.889	3.789
8.69333	3.816	3.891
8.704	3.52	3.745
8.71467	3.075	3.394
8.72533	2.594	2.93
8.736	2.137	2.446
8.74667	1.753	2.021
8.75733	1.463	1.669
8.768	1.259	1.41
8.77867	1.109	1.224
8.78933	1.018	1.103
8.8	0.975	1.027
8.81067	0.964	0.99
8.82133	0.981	0.994
8.832	1.011	1.016
8.84267	1.049	1.046
8.85333	1.073	1.069
8.864	1.075	1.083
8.87467	1.058	1.08
8.88533	1.025	1.049
8.896	0.977	1.017
8.90667	0.935	0.975
8.91733	0.899	0.935
8.928	0.878	0.905
8.93867	0.87	0.909
8.94933	0.892	0.93
8.96	0.933	0.982
8.97067	0.99	1.068
8.98133	1.045	1.171
8.992	1.103	1.276
9.00267	1.151	1.373
9.01333	1.183	1.449
9.024	1.2	1.49
9.03467	1.188	1.499
9.04533	1.155	1.463
9.056	1.12	1.408
9.06667	1.074	1.334
9.07733	1.027	1.251
9.088	0.984	1.176
9.09867	0.945	1.116
9.10933	0.924	1.047
9.12	0.929	1.022
9.13067	0.985	1.025
9.14133	1.155	1.103
9.152	1.504	1.322
9.16267	2.102	1.741
9.17333	2.969	2.423
9.184	4.026	3.35
9.19467	5.107	4.424
9.20533	6.031	5.446
9.216	6.63	6.251
9.22667	6.83	6.693
9.23733	6.622	6.725
9.248	6.087	6.393
9.25867	5.35	5.774
9.26933	4.527	5.007
9.28	3.732	4.208
9.29067	3.037	3.449
9.30133	2.456	2.804
9.312	2.017	2.283
9.32267	1.7	1.881
9.33333	1.494	1.605
9.344	1.386	1.439
9.35467	1.359	1.347
9.36533	1.388	1.328
9.376	1.447	1.365
9.38667	1.508	1.408
9.39733	1.549	1.448
9.408	1.546	1.458
9.41867	1.488	1.43
9.42933	1.415	1.381
9.44	1.325	1.308
9.45067	1.229	1.224
9.46133	1.154	1.147
9.472	1.141	1.09
9.48267	1.183	1.079
9.49333	1.328	1.137
9.504	1.551	1.291
9.51467	1.836	1.535
9.52533	2.095	1.816
9.536	2.248	2.058
9.54667	2.261	2.197
9.55733	2.144	2.185
9.568	1.941	2.046
9.57867	1.729	1.828
9.58933	1.546	1.583
9.6	1.413	1.36
9.61067	1.33	1.191
9.62133	1.287	1.068
9.632	1.251	0.984
9.64267	1.213	0.93
9.65333	1.175	0.894
9.664	1.127	0.873
9.67467	1.087	0.855
9.68533	1.061	0.851
9.696	1.033	0.845
9.70667	1.02	0.851
9.71733	0.998	0.853
9.728	0.983	0.851
9.73867	0.957	0.837
9.74933	0.938	0.832
9.76	0.92	0.827
9.77067	0.905	0.82
9.78133	0.892	0.818
9.792	0.88	0.811
9.80267	0.889	0.807
9.81333	0.881	0.802
9.824	0.88	0.806
9.83467	0.872	0.808
9.84533	0.873	0.807
9.856	0.882	0.808
9.86667	0.893	0.802
9.87733	0.897	0.803
9.888	0.903	0.801
9.89867	0.906	0.795
9.90933	0.908	0.794
9.92	0.913	0.79
9.93067	0.918	0.795
9.94133	0.927	0.794
9.952	0.949	0.796
9.96267	1.005	0.8
9.97333	1.122	0.818
9.984	1.362	0.848
9.99467	1.807	0.913
10.0053	2.553	1.052
10.016	3.645	1.334
10.0267	5.042	1.829
10.0373	6.567	2.577
10.048	7.955	3.539
10.0587	8.932	4.562
10.0693	9.293	5.447
10.08	8.989	5.995
10.0907	8.142	6.094
10.1013	6.943	5.747
10.112	5.637	5.074
10.1227	4.412	4.241
10.1333	3.389	3.408
10.144	2.621	2.666
10.1547	2.099	2.086
10.1653	1.782	1.674
10.176	1.613	1.398
10.1867	1.543	1.232
10.1973	1.521	1.126
10.208	1.521	1.055
10.2187	1.512	1.016
10.2293	1.484	0.987
10.24	1.43	0.973
10.2507	1.371	0.975
10.2613	1.32	0.984
10.272	1.273	0.999
10.2827	1.229	1.013
10.2933	1.196	1.019
10.304	1.162	1.022
10.3147	1.129	1.015
10.3253	1.094	1.003
10.336	1.07	0.984
10.3467	1.061	0.975
10.3573	1.065	0.991
10.368	1.109	1.048
10.3787	1.181	1.155
10.3893	1.264	1.311
10.4	1.349	1.478
10.4107	1.411	1.627
10.4213	1.432	1.713
10.432	1.413	1.744
10.4427	1.361	1.702
10.4533	1.282	1.601
10.464	1.203	1.477
10.4747	1.119	1.336
10.4853	1.054	1.216
10.496	1.002	1.112
10.5067	0.976	1.046
10.5173	0.976	1.011
10.528	1	1.006
10.5387	1.073	1.015
10.5493	1.246	1.048
10.56	1.608	1.091
10.5707	2.322	1.14
10.5813	3.633	1.174
10.592	5.713	1.195
10.6027	8.523	1.193
10.6133	11.722	1.17
10.624	14.663	1.13
10.6347	16.68	1.091
10.6453	17.338	1.061
10.656	16.578	1.032
10.6667	14.718	1.014
10.6773	12.282	1.008
10.688	9.787	1.01
10.6987	7.609	1.005
10.7093	5.909	1.003
10.72	4.661	1.007
10.7307	3.77	1.016
10.7413	3.117	1.028
10.752	2.625	1.035
10.7627	2.227	1.052
10.7733	1.906	1.051
10.784	1.653	1.056
10.7947	1.461	1.058
10.8053	1.326	1.059
10.816	1.223	1.072
10.8267	1.157	1.073
10.8373	1.12	1.074
10.848	1.094	1.073
10.8587	1.069	1.083
10.8693	1.054	1.083
10.88	1.042	1.08
10.8907	1.035	1.08
10.9013	1.027	1.087
10.912	1.014	1.092
10.9227	1.018	1.093
10.9333	1.021	1.103
10.944	1.032	1.111
10.9547	1.03	1.125
10.9653	1.051	1.13
10.976	1.05	1.139
10.9867	1.061	1.164
10.9973	1.06	1.191
11.008	1.072	1.236
11.0187	1.091	1.3
11.0293	1.12	1.407
11.04	1.141	1.569
11.0507	1.172	1.792
11.0613	1.204	2.115
11.072	1.235	2.595
11.0827	1.271	3.402
11.0933	1.319	5.034
11.104	1.382	9.23
11.1147	1.499	21.05
11.1253	1.728	51.509
11.136	2.237	116.116
11.1467	3.282	225.549
11.1573	5.301	375.26
11.168	8.738	542.671
11.1787	13.856	695.66
11.1893	20.441	805.262
11.2	27.699	854.781
11.2107	34.384	842.807
11.2213	39.208	780.168
11.232	41.298	684.01
11.2427	40.444	572.165
11.2533	37.098	459.342
11.264	32.111	355.576
11.2747	26.437	266.67
11.2853	20.875	194.826
11.296	15.962	139.825
11.3067	12.009	100.207
11.3173	9.095	74.142
11.328	7.184	59.861
11.3387	6.121	55.544
11.3493	5.722	58.862
11.36	5.723	66.726
11.3707	5.874	75.541
11.3813	5.982	81.917
11.392	5.899	83.568
11.4027	5.593	79.849
11.4133	5.112	71.582
11.424	4.532	60.5
11.4347	3.954	48.569
11.4453	3.448	37.364
11.456	3.072	27.844
11.4667	2.811	20.353
11.4773	2.668	14.847
11.488	2.604	10.992
11.4987	2.595	8.416
11.5093	2.615	6.742
11.52	2.65	5.683
11.5307	2.694	5.012
11.5413	2.72	4.578
11.552	2.749	4.281
11.5627	2.771	4.073
11.5733	2.776	3.904
11.584	2.763	3.757
11.5947	2.742	3.628
11.6053	2.702	3.503
11.616	2.647	3.38
11.6267	2.581	3.263
11.6373	2.504	3.154
11.648	2.427	3.064
11.6587	2.353	2.971
11.6693	2.289	2.892
11.68	2.232	2.82
11.6907	2.194	2.762
11.7013	2.195	2.697
11.712	2.267	2.64
11.7227	2.456	2.582
11.7333	2.788	2.512
11.744	3.284	2.426
11.7547	3.901	2.33
11.7653	4.517	2.22
11.776	5.006	2.106
11.7867	5.267	1.987
11.7973	5.259	1.877
11.808	5.029	1.776
11.8187	4.668	1.69
11.8293	4.268	1.617
11.84	3.915	1.57
11.8507	3.626	1.539
11.8613	3.416	1.535
11.872	3.241	1.557
11.8827	3.085	1.596
11.8933	2.936	1.635
11.904	2.769	1.666
11.9147	2.582	1.67
11.9253	2.376	1.656
11.936	2.164	1.615
11.9467	1.949	1.563
11.9573	1.75	1.504
11.968	1.594	1.444
11.9787	1.455	1.385
11.9893	1.359	1.343
12	1.285	1.317
12.0107	1.247	1.325
12.0213	1.237	1.376
12.032	1.282	1.484
12.0427	1.363	1.686
12.0533	1.508	1.989
12.064	1.699	2.415
12.0747	1.958	2.983
12.0853	2.257	3.704
12.096	2.602	4.556
12.1067	2.988	5.522
12.1173	3.4	6.576
12.128	3.82	7.658
12.1387	4.246	8.735
12.1493	4.653	9.747
12.16	5.025	10.639
12.1707	5.319	11.357
12.1813	5.546	11.875
12.192	5.681	12.188
12.2027	5.736	12.296
12.2133	5.737	12.229
12.224	5.665	12.01
12.2347	5.541	11.67
12.2453	5.368	11.232
12.256	5.16	10.736
12.2667	4.938	10.196
12.2773	4.702	9.633
12.288	4.441	9.051
12.2987	4.194	8.458
12.3093	3.955	7.884
12.32	3.725	7.319
12.3307	3.523	6.781
12.3413	3.34	6.271
12.352	3.186	5.785
12.3627	3.061	5.332
12.3733	2.956	4.91
12.384	2.872	4.533
12.3947	2.803	4.187
12.4053	2.748	3.877
12.416	2.688	3.592
12.4267	2.631	3.352
12.4373	2.568	3.126
12.448	2.506	2.929
12.4587	2.43	2.751
12.4693	2.362	2.59
12.48	2.293	2.44
12.4907	2.208	2.314
12.5013	2.132	2.188
12.512	2.053	2.086
12.5227	1.975	1.982
12.5333	1.898	1.89
12.544	1.821	1.804
12.5547	1.747	1.727
12.5653	1.679	1.656
12.576	1.616	1.599
12.5867	1.555	1.533
12.5973	1.497	1.485
12.608	1.447	1.437
12.6187	1.398	1.4
12.6293	1.356	1.37
12.64	1.315	1.335
12.6507	1.275	1.311
12.6613	1.251	1.288
12.672	1.225	1.266
12.6827	1.213	1.254
12.6933	1.196	1.242
12.704	1.2	1.232
12.7147	1.205	1.234
12.7253	1.221	1.246
12.736	1.242	1.246
12.7467	1.283	1.253
12.7573	1.33	1.277
12.768	1.395	1.334
12.7787	1.485	1.446
12.7893	1.602	1.639
12.8	1.755	1.941
12.8107	1.92	2.376
12.8213	2.118	2.963
12.832	2.336	3.69
12.8427	2.61	4.61
12.8533	3.04	5.752
12.864	3.839	7.207
12.8747	5.399	9.171
12.8853	8.392	11.954
12.896	13.921	15.876
12.9067	23.684	21.059
12.9173	39.978	27.224
12.928	65.226	33.582
12.9387	101.004	39.024
12.9493	146.866	42.467
12.96	199.801	43.25
12.9707	254.72	41.312
12.9813	305.669	37.164
12.992	347.399	31.64
13.0027	376.513	25.648
13.0133	391.755	19.956
13.024	393.861	15.057
13.0347	384.88	11.196
13.0453	367.425	8.391
13.056	344.25	6.535
13.0667	317.754	5.463
13.0773	289.796	4.935
13.088	261.74	4.744
13.0987	234.525	4.677
13.1093	208.749	4.599
13.12	184.799	4.4
13.1307	162.861	4.07
13.1413	143.015	3.635
13.152	125.251	3.155
13.1627	109.48	2.686
13.1733	95.572	2.268
13.184	83.377	1.914
13.1947	72.71	1.652
13.2053	63.391	1.46
13.216	55.294	1.328
13.2267	48.248	1.24
13.2373	42.134	1.19
13.248	36.843	1.161
13.2587	32.264	1.155
13.2693	28.312	1.165
13.28	24.911	1.181
13.2907	21.981	1.201
13.3013	19.464	1.218
13.312	17.304	1.244
13.3227	15.428	1.248
13.3333	13.819	1.257
13.344	12.443	1.253
13.3547	11.244	1.234
13.3653	10.214	1.211
13.376	9.321	1.186
13.3867	8.563	1.161
13.3973	7.896	1.135
13.408	7.317	1.113
13.4187	6.811	1.085
13.4293	6.367	1.067
13.44	5.971	1.044
13.4507	5.626	1.023
13.4613	5.311	1.004
13.472	5.037	0.993
13.4827	4.788	0.987
13.4933	4.562	0.968
13.504	4.363	0.963
13.5147	4.182	0.956
13.5253	4.016	0.944
13.536	3.866	0.934
13.5467	3.723	0.926
13.5573	3.597	0.926
13.568	3.482	0.925
13.5787	3.38	0.922
13.5893	3.294	0.922
13.6	3.217	0.928
13.6107	3.144	0.935
13.6213	3.084	0.941
13.632	3.029	0.952
13.6427	2.975	0.959
13.6533	2.935	0.972
13.664	2.906	0.993
13.6747	2.878	1.025
13.6853	2.864	1.084
13.696	2.86	1.184
13.7067	2.882	1.334
13.7173	2.911	1.528
13.728	2.953	1.753
13.7387	2.991	1.974
13.7493	3	2.149
13.76	2.996	2.24
13.7707	2.962	2.247
13.7813	2.91	2.171
13.792	2.846	2.034
13.8027	2.802	1.862
13.8133	2.796	1.679
13.824	2.865	1.511
13.8347	3.052	1.358
13.8453	3.374	1.237
13.856	3.846	1.141
13.8667	4.411	1.076
13.8773	5.02	1.029
13.888	5.573	0.995
13.8987	5.998	0.98
13.9093	6.245	0.972
13.92	6.385	0.964
13.9307	6.568	0.959
13.9413	7.143	0.951
13.952	8.665	0.941
13.9627	11.78	0.929
13.9733	17.104	0.923
13.984	24.796	0.905
13.9947	34.33	0.897
14.0053	44.485	0.893
14.016	53.621	0.879
14.0267	60.215	0.867
14.0373	63.264	0.856
14.048	62.519	0.851
14.0587	58.454	0.847
14.0693	52.011	0.848
14.08	44.302	0.855
14.0907	36.332	0.859
14.1013	28.859	0.862
14.112	22.372	0.86
14.1227	17.058	0.864
14.1333	12.921	0.87
14.144	9.808	0.871
14.1547	7.547	0.867
14.1653	5.936	0.868
14.176	4.81	0.86
14.1867	4.043	0.861
14.1973	3.528	0.852
14.208	3.217	0.848
14.2187	3.1	0.841
14.2293	3.249	0.84
14.24	3.836	0.837
14.2507	5.143	0.826
14.2613	7.476	0.826
14.272	11.095	0.82
14.2827	16.013	0.82
14.2933	21.796	0.821
14.304	27.704	0.816
14.3147	32.847	0.816
14.3253	36.572	0.816
14.336	38.819	0.814
14.3467	40.316	0.816
14.3573	42.386	0.819
14.368	46.486	0.822
14.3787	53.561	0.824
14.3893	63.53	0.833
14.4	75.12	0.828
14.4107	86.25	0.83
14.4213	94.745	0.833
14.432	98.892	0.835
14.4427	97.975	0.838
14.4533	92.318	0.835
14.464	82.98	0.844
14.4747	71.464	0.841
14.4853	59.236	0.846
14.496	47.503	0.85
14.5067	37.036	0.843
14.5173	28.232	0.843
14.528	21.171	0.841
14.5387	15.718	0.837
14.5493	11.657	0.836
14.56	8.696	0.832
14.5707	6.601	0.834
14.5813	5.149	0.835
14.592	4.154	0.84
14.6027	3.482	0.844
14.6133	3.028	0.852
14.624	2.724	0.855
14.6347	2.511	0.86
14.6453	2.368	0.868
14.656	2.274	0.872
14.6667	2.194	0.886
14.6773	2.138	0.904
14.688	2.107	0.922
14.6987	2.086	0.941
14.7093	2.076	0.978
14.72	2.084	1.023
14.7307	2.097	1.072
14.7413	2.123	1.13
14.752	2.144	1.173
14.7627	2.174	1.218
14.7733	2.197	1.244
14.784	2.21	1.256
14.7947	2.207	1.249
14.8053	2.186	1.215
14.816	2.165	1.182
14.8267	2.152	1.136
14.8373	2.161	1.093
14.848	2.266	1.063
14.8587	2.557	1.034
14.8693	3.233	1.019
14.88	4.581	1.002
14.8907	6.958	1.005
14.9013	10.651	1
14.912	15.683	0.997
14.9227	21.69	0.992
14.9333	27.846	0.983
14.944	33.124	0.973
14.9547	36.566	0.968
14.9653	37.591	0.953
14.976	36.181	0.949
14.9867	32.785	0.94
14.9973	28.132	0.92
15.008	23.007	0.917
15.0187	18.077	0.908
15.0293	13.759	0.902
15.04	10.256	0.901
15.0507	7.59	0.899
15.0613	5.659	0.903
15.072	4.316	0.903
15.0827	3.42	0.906
15.0933	2.839	0.92
15.104	2.466	0.919
15.1147	2.226	0.923
15.1253	2.071	0.926
15.136	1.982	0.94
15.1467	1.922	0.949
15.1573	1.882	0.965
15.168	1.865	0.997
15.1787	1.853	1.028
15.1893	1.849	1.071
15.2	1.846	1.12
15.2107	1.837	1.155
15.2213	1.836	1.183
15.232	1.826	1.191
15.2427	1.809	1.178
15.2533	1.794	1.148
15.264	1.772	1.125
15.2747	1.746	1.079
15.2853	1.726	1.039
15.296	1.716	1.002
15.3067	1.711	0.979
15.3173	1.699	0.961
15.328	1.69	0.946
15.3387	1.684	0.936
15.3493	1.679	0.921
15.36	1.677	0.91
15.3707	1.673	0.907
15.3813	1.673	0.906
15.392	1.666	0.9
15.4027	1.664	0.899
15.4133	1.668	0.894
15.424	1.667	0.895
15.4347	1.672	0.892
15.4453	1.676	0.891
15.456	1.684	0.892
15.4667	1.688	0.894
15.4773	1.682	0.897
15.488	1.683	0.89
15.4987	1.688	0.897
15.5093	1.684	0.899
15.52	1.684	0.903
15.5307	1.692	0.898
15.5413	1.699	0.9
15.552	1.698	0.903
15.5627	1.708	0.908
15.5733	1.711	0.907
15.584	1.71	0.904
15.5947	1.718	0.905
15.6053	1.714	0.905
15.616	1.71	0.897
15.6267	1.707	0.896
15.6373	1.697	0.892
15.648	1.698	0.898
15.6587	1.694	0.896
15.6693	1.691	0.896
15.68	1.69	0.9
15.6907	1.682	0.903
15.7013	1.685	0.904
15.712	1.685	0.908
15.7227	1.681	0.911
15.7333	1.671	0.907
15.744	1.666	0.907
15.7547	1.666	0.91
15.7653	1.671	0.907
15.776	1.67	0.91
15.7867	1.675	0.913
15.7973	1.684	0.922
15.808	1.691	0.924
15.8187	1.699	0.934
15.8293	1.71	0.94
15.84	1.716	0.951
15.8507	1.713	0.956
15.8613	1.715	0.956
15.872	1.709	0.959
15.8827	1.706	0.963
15.8933	1.7	0.966
15.904	1.698	0.964
15.9147	1.697	0.958
15.9253	1.702	0.953
15.936	1.711	0.951
15.9467	1.736	0.949
15.9573	1.764	0.952
15.968	1.786	0.951
15.9787	1.823	0.952
15.9893	1.86	0.956
16	1.898	0.958
16.0107	1.929	0.954
16.0213	1.961	0.958
16.032	1.972	0.959
16.0427	1.982	0.961
16.0533	1.98	0.954
16.064	1.969	0.952
16.0747	1.945	0.953
16.0853	1.928	0.953
16.096	1.901	0.957
16.1067	1.868	0.955
16.1173	1.842	0.955
16.128	1.82	0.961
16.1387	1.798	0.957
16.1493	1.783	0.962
16.16	1.772	0.967
16.1707	1.755	0.972
16.1813	1.747	0.98
16.192	1.73	0.979
16.2027	1.728	0.982
16.2133	1.722	0.994
16.224	1.72	1.018
16.2347	1.718	1.035
16.2453	1.713	1.063
16.256	1.726	1.086
16.2667	1.713	1.104
16.2773	1.711	1.123
16.288	1.7	1.126
16.2987	1.701	1.125
16.3093	1.699	1.114
16.32	1.696	1.086
16.3307	1.696	1.066
16.3413	1.706	1.048
16.352	1.715	1.027
16.3627	1.726	1.004
16.3733	1.745	0.992
16.384	1.79	0.987
16.3947	1.878	0.988
16.4053	2.034	0.993
16.416	2.284	1.022
16.4267	2.632	1.057
16.4373	3.07	1.095
16.448	3.556	1.14
16.4587	4.012	1.174
16.4693	4.36	1.204
16.48	4.544	1.224
16.4907	4.539	1.223
16.5013	4.352	1.201
16.512	4.03	1.169
16.5227	3.639	1.136
16.5333	3.228	1.102
16.544	2.853	1.071
16.5547	2.526	1.042
16.5653	2.277	1.017
16.576	2.095	0.992
16.5867	1.96	0.974
16.5973	1.873	0.969
16.608	1.812	0.966
16.6187	1.775	0.963
16.6293	1.759	0.956
16.64	1.744	0.958
16.6507	1.737	0.96
16.6613	1.727	0.954
16.672	1.73	0.958
16.6827	1.729	0.963
16.6933	1.72	0.968
16.704	1.726	0.966
16.7147	1.736	0.972
16.7253	1.735	0.973
16.736	1.739	0.981
16.7467	1.75	0.997
16.7573	1.762	1.013
16.768	1.792	1.035
16.7787	1.825	1.065
16.7893	1.858	1.089
16.8	1.885	1.123
16.8107	1.913	1.143
16.8213	1.925	1.147
16.832	1.937	1.138
16.8427	1.944	1.12
16.8533	1.93	1.097
16.864	1.914	1.065
16.8747	1.903	1.035
16.8853	1.884	1.015
16.896	1.865	0.994
16.9067	1.849	0.985
16.9173	1.83	0.981
16.928	1.798	0.978
16.9387	1.778	0.975
16.9493	1.765	0.979
16.96	1.75	0.974
16.9707	1.74	0.978
16.9813	1.726	0.987
16.992	1.712	0.981
17.0027	1.702	0.986
17.0133	1.69	0.996
17.024	1.684	0.995
17.0347	1.678	1.003
17.0453	1.668	1.019
17.056	1.665	1.034
17.0667	1.661	1.052
17.0773	1.649	1.07
17.088	1.641	1.089
17.0987	1.635	1.11
17.1093	1.628	1.113
17.12	1.625	1.118
17.1307	1.621	1.105
17.1413	1.61	1.093
17.152	1.603	1.079
17.1627	1.604	1.057
17.1733	1.601	1.037
17.184	1.594	1.015
17.1947	1.595	1
17.2053	1.589	0.989
17.216	1.587	0.969
17.2267	1.583	0.956
17.2373	1.585	0.942
17.248	1.586	0.93
17.2587	1.586	0.918
17.2693	1.588	0.912
17.28	1.585	0.907
17.2907	1.59	0.899
17.3013	1.599	0.899
17.312	1.599	0.897
17.3227	1.611	0.892
17.3333	1.622	0.891
17.344	1.637	0.882
17.3547	1.65	0.88
17.3653	1.656	0.881
17.376	1.665	0.882
17.3867	1.667	0.877
17.3973	1.671	0.876
17.408	1.68	0.875
17.4187	1.689	0.878
17.4293	1.691	0.881
17.44	1.695	0.872
17.4507	1.703	0.876
17.4613	1.71	0.876
17.472	1.732	0.877
17.4827	1.762	0.874
17.4933	1.814	0.877
17.504	1.894	0.876
17.5147	2.003	0.88
17.5253	2.149	0.88
17.536	2.319	0.882
17.5467	2.492	0.88
17.5573	2.65	0.88
17.568	2.773	0.893
17.5787	2.839	0.888
17.5893	2.826	0.886
17.6	2.76	0.894
17.6107	2.644	0.891
17.6213	2.504	0.89
17.632	2.349	0.887
17.6427	2.202	0.893
17.6533	2.077	0.89
17.664	1.969	0.887
17.6747	1.893	0.891
17.6853	1.822	0.896
17.696	1.775	0.888
17.7067	1.735	0.885
17.7173	1.704	0.886
17.728	1.682	0.884
17.7387	1.654	0.891
17.7493	1.624	0.892
17.76	1.607	0.893
17.7707	1.582	0.886
17.7813	1.568	0.884
17.792	1.543	0.885
17.8027	1.524	0.888
17.8133	1.516	0.884
17.824	1.5	0.888
17.8347	1.486	0.88
17.8453	1.477	0.884
17.856	1.476	0.883
17.8667	1.472	0.882
17.8773	1.48	0.877
17.888	1.492	0.88
17.8987	1.507	0.877
17.9093	1.534	0.884
17.92	1.57	0.879
17.9307	1.609	0.882
17.9413	1.661	0.881
17.952	1.719	0.876
17.9627	1.783	0.877
17.9733	1.843	0.878
17.984	1.897	0.885
17.9947	1.931	0.886
18.0053	1.945	0.881
18.016	1.929	0.885
18.0267	1.901	0.89
18.0373	1.86	0.887
18.048	1.811	0.882
18.0587	1.758	0.887
18.0693	1.693	0.887
18.08	1.638	0.89
18.0907	1.597	0.89
18.1013	1.564	0.885
18.112	1.532	0.886
18.1227	1.51	0.886
18.1333	1.488	0.886
18.144	1.465	0.896
18.1547	1.455	0.898
18.1653	1.438	0.895
18.176	1.426	0.898
18.1867	1.419	0.901
18.1973	1.413	0.904
18.208	1.406	0.905
18.2187	1.405	0.901
18.2293	1.397	0.907
18.24	1.393	0.898
18.2507	1.399	0.895
18.2613	1.395	0.897
18.272	1.396	0.904
18.2827	1.391	0.905
18.2933	1.399	0.904
18.304	1.398	0.912
18.3147	1.395	0.905
18.3253	1.401	0.913
18.336	1.402	0.923
18.3467	1.404	0.93
18.3573	1.404	0.93
18.368	1.41	0.927
18.3787	1.411	0.924
18.3893	1.413	0.924
18.4	1.414	0.928
18.4107	1.41	0.919
18.4213	1.409	0.913
18.432	1.401	0.913
18.4427	1.401	0.92
18.4533	1.405	0.92
18.464	1.407	0.925
18.4747	1.411	0.925
18.4853	1.414	0.929
18.496	1.41	0.932
18.5067	1.419	0.935
18.5173	1.42	0.939
18.528	1.423	0.943
18.5387	1.425	0.948
18.5493	1.428	0.954
18.56	1.431	0.953
18.5707	1.432	0.952
18.5813	1.434	0.956
18.592	1.441	0.967
18.6027	1.446	0.976
18.6133	1.444	0.984
18.624	1.451	0.989
18.6347	1.458	0.998
18.6453	1.469	1.005
18.656	1.472	1.014
18.6667	1.48	1.025
18.6773	1.491	1.031
18.688	1.497	1.037
18.6987	1.501	1.045
18.7093	1.509	1.051
18.72	1.516	1.064
18.7307	1.519	1.067
18.7413	1.523	1.065
18.752	1.525	1.063
18.7627	1.518	1.056
18.7733	1.519	1.047
18.784	1.511	1.042
18.7947	1.503	1.043
18.8053	1.501	1.036
18.816	1.498	1.035
18.8267	1.488	1.037
18.8373	1.484	1.043
18.848	1.483	1.039
18.8587	1.479	1.038
18.8693	1.474	1.038
18.88	1.469	1.04
18.8907	1.481	1.042
18.9013	1.488	1.042
18.912	1.481	1.045
18.9227	1.474	1.048
18.9333	1.478	1.055
18.944	1.486	1.062
18.9547	1.493	1.063
18.9653	1.501	1.065
18.976	1.502	1.069
18.9867	1.514	1.081
18.9973	1.526	1.089
19.008	1.532	1.095
19.0187	1.542	1.099
19.0293	1.544	1.107
19.04	1.554	1.119
19.0507	1.563	1.131
19.0613	1.577	1.141
19.072	1.594	1.16
19.0827	1.602	1.168
19.0933	1.619	1.187
19.104	1.625	1.197
19.1147	1.636	1.201
19.1253	1.637	1.207
19.136	1.641	1.212
19.1467	1.648	1.218
19.1573	1.65	1.217
19.168	1.647	1.225
19.1787	1.648	1.225
19.1893	1.651	1.229
19.2	1.652	1.222
19.2107	1.662	1.229
19.2213	1.661	1.229
19.232	1.669	1.234
19.2427	1.674	1.24
19.2533	1.687	1.242
19.264	1.691	1.252
19.2747	1.699	1.26
19.2853	1.709	1.267
19.296	1.718	1.277
19.3067	1.731	1.289
19.3173	1.74	1.3
19.328	1.743	1.311
19.3387	1.76	1.314
19.3493	1.76	1.324
19.36	1.761	1.33
19.3707	1.768	1.328
19.3813	1.762	1.329
19.392	1.762	1.331
19.4027	1.759	1.332
19.4133	1.758	1.327
19.424	1.759	1.321
19.4347	1.753	1.317
19.4453	1.753	1.303
19.456	1.742	1.295
19.4667	1.733	1.29
19.4773	1.728	1.277
19.488	1.721	1.275
19.4987	1.715	1.267
19.5093	1.711	1.266
19.52	1.722	1.261
19.5307	1.71	1.254
19.5413	1.709	1.246
19.552	1.704	1.24
19.5627	1.695	1.229
19.5733	1.697	1.229
19.584	1.69	1.219
19.5947	1.683	1.216
19.6053	1.676	1.209
19.616	1.679	1.209
19.6267	1.672	1.204
19.6373	1.667	1.205
19.648	1.667	1.193
19.6587	1.657	1.19
19.6693	1.653	1.188
19.68	1.653	1.182
19.6907	1.648	1.18
19.7013	1.646	1.174
19.712	1.635	1.16
19.7227	1.638	1.156
19.7333	1.631	1.154
19.744	1.623	1.139
19.7547	1.619	1.135
19.7653	1.608	1.129
19.776	1.612	1.122
19.7867	1.602	1.115
19.7973	1.586	1.108
19.808	1.58	1.095
19.8187	1.567	1.081
19.8293	1.558	1.067
19.84	1.549	1.059
19.8507	1.534	1.052
19.8613	1.523	1.044
19.872	1.51	1.024
19.8827	1.496	1.012
19.8933	1.487	0.997
19.904	1.479	0.985
19.9147	1.465	0.968
19.9253	1.448	0.95
19.936	1.437	0.933
19.9467	1.424	0.931
19.9573	1.41	0.914
19.968	1.393	0.897
19.9787	1.376	0.888
19.9893	1.356	0.872
20	1.338	0.851
20.0107	1.317	0.837
20.0213	1.298	0.818
20.032	1.281	0.802
20.0427	1.258	0.793
20.0533	1.235	0.78
20.064	1.219	0.759
20.0747	1.189	0.743
20.0853	1.174	0.724
20.096	1.152	0.701
20.1067	1.128	0.688
20.1173	1.103	0.676
20.128	1.082	0.662
20.1387	1.059	0.646
20.1493	1.043	0.631
20.16	1.024	0.618
20.1707	1.002	0.6
20.1813	0.981	0.585
20.192	0.957	0.564
20.2027	0.931	0.548
20.2133	0.904	0.529
20.224	0.885	0.517
20.2347	0.868	0.497
20.2453	0.847	0.478
20.256	0.821	0.469
20.2667	0.797	0.449
20.2773	0.779	0.429
20.288	0.749	0.415
20.2987	0.734	0.408
20.3093	0.713	0.39
20.32	0.688	0.378
20.3307	0.673	0.366
20.3413	0.646	0.348
20.352	0.63	0.333
20.3627	0.618	0.325
20.3733	0.6	0.31
20.384	0.571	0.299
20.3947	0.56	0.284
20.4053	0.54	0.298
20.416	0.528	0.268
20.4267	0.508	0.252
20.4373	0.491	0.238
20.448	0.467	0.233
20.4587	0.448	0.222
20.4693	0.433	0.211
20.48	0.415	0.206
20.4907	0.41	0.201
20.5013	0.396	0.189
20.512	0.377	0.186
20.5227	0.368	0.173
20.5333	0.351	0.166
20.544	0.336	0.158
20.5547	0.323	0.158
20.5653	0.313	0.153
20.576	0.298	0.147
20.5867	0.292	0.142
20.5973	0.279	0.138
20.608	0.254	0.133
20.6187	0.245	0.128
20.6293	0.243	0.126
20.64	0.227	0.128
20.6507	0.223	0.124
20.6613	0.209	0.112
20.672	0.198	0.111
20.6827	0.196	0.107
20.6933	0.177	0.108
20.704	0.17	0.107
20.7147	0.161	0.103
20.7253	0.152	0.101
20.736	0.152	0.102
20.7467	0.141	0.099
20.7573	0.135	0.094
20.768	0.131	0.093
20.7787	0.123	0.089
20.7893	0.116	0.09
20.8	0.115	0.091
20.8107	0.115	0.081
20.8213	0.101	0.084
20.832	0.094	0.086
20.8427	0.086	0.076
20.8533	0.081	0.071
20.864	0.081	0.066
20.8747	0.082	0.067
20.8853	0.077	0.061
20.896	0.07	0.064
20.9067	0.074	0.068
20.9173	0.066	0.067
20.928	0.065	0.059
20.9387	0.052	0.069
20.9493	0.044	0.063
20.96	0.035	0.06
20.9707	0.031	0.05
20.9813	0.032	0.048
20.992	0.026	0.045
21.0027	0.023	0.04
21.0133	0.019	0.043
21.024	0.018	0.04
21.0347	0.017	0.031
21.0453	0.019	0.024
21.056	0.015	0.018
21.0667	0.006	0.019
21.0773	0.009	0.018
21.088	0.005	0.008
21.0987	0.001	0.01
21.1093	0.001	0.008
21.12	-0.002	0.012
21.1307	-0.004	0.005
21.1413	-0.007	0.007
21.152	-0.009	-0.001
21.1627	-0.014	-0.003
21.1733	-0.016	-0.009
21.184	-0.025	-0.016
21.1947	-0.026	-0.022
21.2053	-0.031	-0.021
21.216	-0.034	-0.026
21.2267	-0.035	-0.027
21.2373	-0.039	-0.03
21.248	-0.041	-0.034
21.2587	-0.038	-0.038
21.2693	-0.048	-0.035
21.28	-0.049	-0.042
21.2907	-0.05	-0.045
21.3013	-0.055	-0.046
[truncated: 254 more rows]
