# Supplementary material for: A novel ATP dependent dimethylsulfoniopropionate lyase in bacteria that releases dimethyl sulfide and acryloyl-CoA
Source: eLife. 2021 May 10;10:e64045. doi: 10.7554/eLife.64045 (PMC8163506; doi:10.7554/eLife.64045)
Supplement: Figure 4—figure supplement 1—source data 1. [file elife-64045-fig14-data14.xls]

## Sheet: Fig. 4S1B
6.5 KDa		13.7 KDa		29 KDa		75 KDa		158 KDa		440 KDa		669 KDa		DddX
Elution volume (ml)	UV280 (mAU)	Elution volume (ml)	UV280 (mAU)	Elution volume (ml)	UV280 (mAU)	Elution volume (ml)	UV280 (mAU)	Elution volume (ml)	UV280 (mAU)	Elution volume (ml)	UV280 (mAU)	Elution volume (ml)	UV280 (mAU)	Elution volume (ml)	UV280 (mAU)
0	-3.915	0	-3.363	0	-4.246	0	-4.451	0	-4.46	0	-4.482	0	-4.451	0	-4.493
0.0293374	-3.911	0.0325216	-3.35	0.0326652	-4.259	0.0331049	-4.402	0.031709	-4.424	0.0327822	-4.521	0.0349945	-4.484	0.0320867	-4.542
0.0586749	-4	0.0650431	-3.391	0.0653304	-4.266	0.0662097	-4.395	0.063418	-4.397	0.0655643	-4.46	0.0699889	-4.444	0.0641733	-4.518
0.0880123	-3.881	0.0975647	-3.371	0.0979957	-4.267	0.0993146	-4.435	0.0951271	-4.432	0.0983465	-4.447	0.104983	-4.511	0.09626	-4.519
0.11735	-3.99	0.130086	-3.333	0.130661	-4.269	0.132419	-4.473	0.126836	-4.46	0.131129	-4.462	0.139978	-4.47	0.128347	-4.523
0.146687	-3.912	0.162608	-3.385	0.163326	-4.235	0.165524	-4.424	0.158545	-4.408	0.163911	-4.516	0.174972	-4.484	0.160433	-4.471
0.176025	-3.944	0.195129	-3.362	0.195991	-4.248	0.198629	-4.382	0.190254	-4.437	0.196693	-4.51	0.209967	-4.471	0.19252	-4.533
0.205362	-3.922	0.227651	-3.364	0.228657	-4.264	0.231734	-4.425	0.221963	-4.43	0.229475	-4.512	0.244961	-4.5	0.224607	-4.551
0.2347	-3.937	0.260173	-3.375	0.261322	-4.27	0.264839	-4.415	0.253672	-4.414	0.262257	-4.497	0.279956	-4.514	0.256693	-4.507
0.264037	-3.97	0.292694	-3.394	0.293987	-4.22	0.297944	-4.426	0.285381	-4.356	0.295039	-4.473	0.31495	-4.503	0.28878	-4.495
0.293374	-3.956	0.325216	-3.37	0.326652	-4.241	0.331049	-4.438	0.31709	-4.411	0.327822	-4.481	0.349945	-4.479	0.320867	-4.501
0.322712	-3.925	0.357737	-3.396	0.359317	-4.243	0.364153	-4.377	0.348799	-4.388	0.360604	-4.438	0.384939	-4.49	0.352953	-4.575
0.352049	-3.918	0.390259	-3.379	0.391983	-4.203	0.397258	-4.43	0.380508	-4.434	0.393386	-4.518	0.419934	-4.501	0.38504	-4.54
0.381387	-3.927	0.42278	-3.4	0.424648	-4.264	0.430363	-4.375	0.412217	-4.405	0.426168	-4.453	0.454928	-4.536	0.417127	-4.473
0.410724	-3.95	0.455302	-3.384	0.457313	-4.241	0.463468	-4.419	0.443926	-4.393	0.45895	-4.495	0.489922	-4.52	0.449213	-4.538
0.440062	-3.932	0.487824	-3.425	0.489978	-4.286	0.496573	-4.438	0.475635	-4.478	0.491732	-4.476	0.524917	-4.498	0.4813	-4.557
0.469399	-3.96	0.520345	-3.363	0.522644	-4.207	0.529678	-4.423	0.507344	-4.436	0.524515	-4.524	0.559911	-4.502	0.513387	-4.516
0.498737	-3.966	0.552867	-3.383	0.555309	-4.247	0.562782	-4.375	0.539053	-4.392	0.557297	-4.518	0.594906	-4.491	0.545473	-4.566
0.528074	-3.908	0.585388	-3.416	0.587974	-4.253	0.595887	-4.441	0.570762	-4.432	0.590079	-4.497	0.6299	-4.502	0.57756	-4.533
0.557411	-3.937	0.61791	-3.405	0.620639	-4.255	0.628992	-4.372	0.602471	-4.423	0.622861	-4.539	0.664895	-4.488	0.609647	-4.541
0.586749	-3.973	0.650431	-3.381	0.653304	-4.252	0.662097	-4.42	0.63418	-4.41	0.655643	-4.457	0.699889	-4.566	0.641733	-4.524
0.616086	-3.925	0.682953	-3.403	0.68597	-4.251	0.695202	-4.393	0.665889	-4.43	0.688425	-4.472	0.734884	-4.461	0.67382	-4.57
0.645424	-3.963	0.715475	-3.396	0.718635	-4.246	0.728307	-4.423	0.697598	-4.454	0.721208	-4.428	0.769878	-4.537	0.705907	-4.552
0.674761	-4.003	0.747996	-3.393	0.7513	-4.233	0.761412	-4.41	0.729307	-4.378	0.75399	-4.471	0.804873	-4.522	0.737993	-4.522
0.704099	-3.924	0.780518	-3.414	0.783965	-4.251	0.794516	-4.4	0.761016	-4.463	0.786772	-4.485	0.839867	-4.526	0.77008	-4.575
0.733436	-3.961	0.813039	-3.421	0.816631	-4.306	0.827621	-4.424	0.792725	-4.435	0.819554	-4.483	0.874862	-4.49	0.802167	-4.506
0.762774	-3.968	0.845561	-3.418	0.849296	-4.227	0.860726	-4.444	0.824435	-4.422	0.852336	-4.479	0.909856	-4.491	0.834253	-4.493
0.792111	-3.949	0.878082	-3.437	0.881961	-4.285	0.893831	-4.413	0.856144	-4.41	0.885118	-4.454	0.94485	-4.51	0.86634	-4.54
0.821448	-3.955	0.910604	-3.448	0.914626	-4.264	0.926936	-4.425	0.887853	-4.438	0.9179	-4.518	0.979845	-4.533	0.898427	-4.551
0.850786	-3.981	0.943126	-3.462	0.947291	-4.229	0.960041	-4.434	0.919562	-4.417	0.950683	-4.478	1.01484	-4.532	0.930513	-4.58
0.880123	-3.93	0.975647	-3.421	0.979957	-4.264	0.993146	-4.388	0.951271	-4.435	0.983465	-4.441	1.04983	-4.475	0.9626	-4.57
0.909461	-3.996	1.00817	-3.457	1.01262	-4.257	1.02625	-4.417	0.98298	-4.477	1.01625	-4.489	1.08483	-4.495	0.994687	-4.601
0.938798	-3.937	1.04069	-3.492	1.04529	-4.272	1.05936	-4.404	1.01469	-4.458	1.04903	-4.471	1.11982	-4.53	1.02677	-4.533
0.968136	-3.951	1.07321	-3.439	1.07795	-4.293	1.09246	-4.456	1.0464	-4.451	1.08181	-4.521	1.15482	-4.551	1.05886	-4.514
0.997473	-3.975	1.10573	-3.483	1.11062	-4.266	1.12556	-4.469	1.07811	-4.46	1.11459	-4.489	1.18981	-4.557	1.09095	-4.542
1.02681	-3.953	1.13826	-3.508	1.14328	-4.208	1.15867	-4.429	1.10982	-4.52	1.14738	-4.452	1.22481	-4.541	1.12303	-4.535
1.05615	-3.961	1.17078	-3.471	1.17595	-4.278	1.19177	-4.444	1.14152	-4.458	1.18016	-4.453	1.2598	-4.596	1.15512	-4.585
1.08549	-3.993	1.2033	-3.505	1.20861	-4.203	1.22488	-4.417	1.17323	-4.412	1.21294	-4.504	1.2948	-4.548	1.18721	-4.58
1.11482	-3.962	1.23582	-3.524	1.24128	-4.284	1.25798	-4.411	1.20494	-4.473	1.24572	-4.507	1.32979	-4.505	1.21929	-4.598
1.14416	-3.958	1.26834	-3.466	1.27394	-4.198	1.29109	-4.431	1.23665	-4.483	1.2785	-4.515	1.36478	-4.52	1.25138	-4.554
1.1735	-3.949	1.30086	-3.458	1.30661	-4.27	1.32419	-4.451	1.26836	-4.42	1.31129	-4.49	1.39978	-4.488	1.28347	-4.563
1.20284	-3.967	1.33338	-3.526	1.33927	-4.213	1.3573	-4.396	1.30007	-4.422	1.34407	-4.472	1.43477	-4.508	1.31555	-4.547
1.23217	-3.99	1.36591	-3.536	1.37194	-4.244	1.3904	-4.441	1.33178	-4.434	1.37685	-4.457	1.46977	-4.466	1.34764	-4.536
1.26151	-3.957	1.39843	-3.492	1.4046	-4.299	1.42351	-4.412	1.36349	-4.455	1.40963	-4.489	1.50476	-4.564	1.37973	-4.514
1.29085	-3.943	1.43095	-3.534	1.43727	-4.24	1.45661	-4.438	1.3952	-4.495	1.44242	-4.485	1.53976	-4.513	1.41181	-4.572
1.32019	-3.98	1.46347	-3.493	1.46993	-4.263	1.48972	-4.414	1.42691	-4.469	1.4752	-4.517	1.57475	-4.538	1.4439	-4.56
1.34952	-3.976	1.49599	-3.505	1.5026	-4.276	1.52282	-4.437	1.45861	-4.435	1.50798	-4.501	1.60975	-4.548	1.47599	-4.558
1.37886	-3.97	1.52851	-3.472	1.53527	-4.288	1.55593	-4.431	1.49032	-4.383	1.54076	-4.454	1.64474	-4.537	1.50807	-4.619
1.4082	-3.951	1.56104	-3.511	1.56793	-4.27	1.58903	-4.419	1.52203	-4.477	1.57354	-4.486	1.67973	-4.549	1.54016	-4.543
1.43753	-3.983	1.59356	-3.525	1.6006	-4.254	1.62214	-4.492	1.55374	-4.435	1.60633	-4.494	1.71473	-4.575	1.57225	-4.554
1.46687	-3.974	1.62608	-3.524	1.63326	-4.205	1.65524	-4.407	1.58545	-4.43	1.63911	-4.503	1.74972	-4.536	1.60433	-4.532
1.49621	-3.944	1.6586	-3.554	1.66593	-4.266	1.68835	-4.416	1.61716	-4.47	1.67189	-4.483	1.78472	-4.534	1.63642	-4.514
1.52555	-3.977	1.69112	-3.509	1.69859	-4.237	1.72145	-4.391	1.64887	-4.389	1.70467	-4.473	1.81971	-4.513	1.66851	-4.585
1.55488	-3.98	1.72364	-3.546	1.73126	-4.287	1.75456	-4.433	1.68058	-4.475	1.73745	-4.515	1.85471	-4.554	1.70059	-4.574
1.58422	-3.977	1.75616	-3.523	1.76392	-4.249	1.78766	-4.403	1.71229	-4.475	1.77024	-4.438	1.8897	-4.547	1.73268	-4.529
1.61356	-3.97	1.78869	-3.58	1.79659	-4.226	1.82077	-4.428	1.744	-4.459	1.80302	-4.473	1.9247	-4.517	1.76477	-4.541
1.6429	-3.955	1.82121	-3.603	1.82925	-4.3	1.85387	-4.408	1.77571	-4.454	1.8358	-4.463	1.95969	-4.571	1.79685	-4.539
1.67223	-3.969	1.85373	-3.601	1.86192	-4.24	1.88698	-4.434	1.80741	-4.487	1.86858	-4.495	1.99468	-4.535	1.82894	-4.562
1.70157	-3.916	1.88625	-3.583	1.89458	-4.321	1.92008	-4.4	1.83912	-4.461	1.90137	-4.507	2.02968	-4.501	1.86103	-4.588
1.73091	-3.99	1.91877	-3.595	1.92725	-4.288	1.95319	-4.413	1.87083	-4.463	1.93415	-4.516	2.06467	-4.516	1.89311	-4.585
1.76025	-3.909	1.95129	-3.594	1.95991	-4.305	1.98629	-4.397	1.90254	-4.498	1.96693	-4.505	2.09967	-4.53	1.9252	-4.538
1.78958	-3.994	1.98382	-3.604	1.99258	-4.274	2.0194	-4.452	1.93425	-4.475	1.99971	-4.478	2.13466	-4.49	1.95729	-4.551
1.81892	-3.964	2.01634	-3.59	2.02524	-4.264	2.0525	-4.392	1.96596	-4.453	2.03249	-4.519	2.16966	-4.5	1.98937	-4.552
1.84826	-4.006	2.04886	-3.586	2.05791	-4.245	2.08561	-4.417	1.99767	-4.481	2.06528	-4.482	2.20465	-4.507	2.02146	-4.525
1.8776	-3.993	2.08138	-3.631	2.09057	-4.306	2.11871	-4.437	2.02938	-4.483	2.09806	-4.473	2.23965	-4.497	2.05355	-4.571
1.90693	-3.985	2.1139	-3.641	2.12324	-4.295	2.15182	-4.448	2.06109	-4.447	2.13084	-4.48	2.27464	-4.519	2.08563	-4.534
1.93627	-3.934	2.14642	-3.621	2.1559	-4.255	2.18492	-4.444	2.0928	-4.472	2.16362	-4.533	2.30963	-4.48	2.11772	-4.551
1.96561	-3.982	2.17895	-3.608	2.18857	-4.264	2.21803	-4.442	2.1245	-4.454	2.1964	-4.53	2.34463	-4.499	2.14981	-4.519
1.99495	-3.972	2.21147	-3.611	2.22124	-4.278	2.25113	-4.418	2.15621	-4.445	2.22919	-4.525	2.37962	-4.52	2.18189	-4.563
2.02428	-3.964	2.24399	-3.681	2.2539	-4.256	2.28423	-4.449	2.18792	-4.453	2.26197	-4.505	2.41462	-4.505	2.21398	-4.548
2.05362	-3.953	2.27651	-3.636	2.28657	-4.3	2.31734	-4.428	2.21963	-4.461	2.29475	-4.504	2.44961	-4.507	2.24607	-4.57
2.08296	-3.974	2.30903	-3.656	2.31923	-4.327	2.35044	-4.465	2.25134	-4.429	2.32753	-4.484	2.48461	-4.486	2.27815	-4.59
2.1123	-3.961	2.34155	-3.619	2.3519	-4.302	2.38355	-4.449	2.28305	-4.428	2.36032	-4.455	2.5196	-4.541	2.31024	-4.553
2.14163	-3.962	2.37407	-3.675	2.38456	-4.278	2.41665	-4.436	2.31476	-4.429	2.3931	-4.541	2.5546	-4.51	2.34233	-4.577
2.17097	-3.986	2.4066	-3.686	2.41723	-4.333	2.44976	-4.426	2.34647	-4.495	2.42588	-4.451	2.58959	-4.498	2.37441	-4.56
2.20031	-3.967	2.43912	-3.667	2.44989	-4.239	2.48286	-4.447	2.37818	-4.476	2.45866	-4.488	2.62458	-4.481	2.4065	-4.526
2.22965	-3.96	2.47164	-3.706	2.48256	-4.282	2.51597	-4.424	2.40989	-4.507	2.49144	-4.507	2.65958	-4.476	2.43859	-4.528
2.25898	-4.029	2.50416	-3.682	2.51522	-4.29	2.54907	-4.444	2.44159	-4.472	2.52423	-4.525	2.69457	-4.494	2.47067	-4.56
2.28832	-3.93	2.53668	-3.688	2.54789	-4.267	2.58218	-4.435	2.4733	-4.46	2.55701	-4.482	2.72957	-4.422	2.50276	-4.516
2.31766	-3.915	2.5692	-3.681	2.58055	-4.262	2.61528	-4.45	2.50501	-4.492	2.58979	-4.449	2.76456	-4.475	2.53485	-4.569
2.347	-3.94	2.60173	-3.678	2.61322	-4.288	2.64839	-4.459	2.53672	-4.442	2.62257	-4.521	2.79956	-4.484	2.56693	-4.533
2.37633	-3.954	2.63425	-3.698	2.64588	-4.294	2.68149	-4.421	2.56843	-4.469	2.65536	-4.489	2.83455	-4.479	2.59902	-4.551
2.40567	-3.928	2.66677	-3.695	2.67855	-4.29	2.7146	-4.462	2.60014	-4.427	2.68814	-4.506	2.86955	-4.463	2.63111	-4.537
2.43501	-3.975	2.69929	-3.735	2.71121	-4.287	2.7477	-4.423	2.63185	-4.467	2.72092	-4.481	2.90454	-4.508	2.66319	-4.504
2.46435	-3.967	2.73181	-3.712	2.74388	-4.327	2.78081	-4.455	2.66356	-4.444	2.7537	-4.467	2.93953	-4.529	2.69528	-4.544
2.49368	-3.994	2.76433	-3.695	2.77654	-4.277	2.81391	-4.454	2.69527	-4.431	2.78648	-4.488	2.97453	-4.519	2.72737	-4.573
2.52302	-3.942	2.79686	-3.697	2.80921	-4.307	2.84702	-4.472	2.72698	-4.462	2.81927	-4.488	3.00952	-4.479	2.75945	-4.592
2.55236	-3.926	2.82938	-3.661	2.84187	-4.357	2.88012	-4.421	2.75868	-4.461	2.85205	-4.453	3.04452	-4.487	2.79154	-4.568
2.5817	-3.929	2.8619	-3.736	2.87454	-4.284	2.91323	-4.448	2.79039	-4.467	2.88483	-4.486	3.07951	-4.498	2.82363	-4.58
2.61103	-3.915	2.89442	-3.72	2.9072	-4.345	2.94633	-4.479	2.8221	-4.495	2.91761	-4.467	3.11451	-4.503	2.85571	-4.527
2.64037	-3.944	2.92694	-3.739	2.93987	-4.326	2.97944	-4.444	2.85381	-4.473	2.95039	-4.459	3.1495	-4.478	2.8878	-4.552
2.66971	-3.954	2.95946	-3.712	2.97254	-4.304	3.01254	-4.445	2.88552	-4.425	2.98318	-4.456	3.1845	-4.449	2.91989	-4.529
2.69904	-3.974	2.99198	-3.746	3.0052	-4.268	3.04565	-4.461	2.91723	-4.425	3.01596	-4.469	3.21949	-4.459	2.95197	-4.554
2.72838	-3.986	3.02451	-3.763	3.03787	-4.261	3.07875	-4.482	2.94894	-4.494	3.04874	-4.454	3.25448	-4.488	2.98406	-4.541
2.75772	-3.993	3.05703	-3.767	3.07053	-4.309	3.11186	-4.469	2.98065	-4.44	3.08152	-4.484	3.28948	-4.468	3.01615	-4.588
2.78706	-3.947	3.08955	-3.709	3.1032	-4.293	3.14496	-4.462	3.01236	-4.422	3.11431	-4.459	3.32447	-4.482	3.04823	-4.592
2.81639	-3.939	3.12207	-3.746	3.13586	-4.301	3.17807	-4.499	3.04407	-4.461	3.14709	-4.477	3.35947	-4.517	3.08032	-4.564
2.84573	-3.98	3.15459	-3.752	3.16853	-4.351	3.21117	-4.461	3.07577	-4.448	3.17987	-4.517	3.39446	-4.488	3.11241	-4.554
2.87507	-3.955	3.18711	-3.755	3.20119	-4.297	3.24428	-4.431	3.10748	-4.455	3.21265	-4.495	3.42946	-4.47	3.14449	-4.546
2.90441	-3.977	3.21964	-3.703	3.23386	-4.294	3.27738	-4.469	3.13919	-4.432	3.24543	-4.44	3.46445	-4.472	3.17658	-4.568
2.93374	-4.005	3.25216	-3.758	3.26652	-4.297	3.31049	-4.486	3.1709	-4.451	3.27822	-4.438	3.49945	-4.488	3.20867	-4.58
2.96308	-3.949	3.28468	-3.758	3.29919	-4.343	3.34359	-4.445	3.20261	-4.445	3.311	-4.442	3.53444	-4.44	3.24075	-4.611
2.99242	-4.003	3.3172	-3.731	3.33185	-4.311	3.37669	-4.455	3.23432	-4.473	3.34378	-4.482	3.56944	-4.482	3.27284	-4.565
3.02176	-3.965	3.34972	-3.728	3.36452	-4.331	3.4098	-4.487	3.26603	-4.471	3.37656	-4.473	3.60443	-4.483	3.30493	-4.584
3.05109	-4.006	3.38224	-3.744	3.39718	-4.315	3.4429	-4.476	3.29774	-4.487	3.40934	-4.435	3.63942	-4.472	3.33701	-4.531
3.08043	-3.94	3.41477	-3.865	3.42985	-4.32	3.47601	-4.498	3.32945	-4.473	3.44213	-4.546	3.67442	-4.49	3.3691	-4.565
3.10977	-3.992	3.44729	-3.807	3.46251	-4.296	3.50911	-4.436	3.36116	-4.409	3.47491	-4.519	3.70941	-4.501	3.40119	-4.632
3.13911	-3.998	3.47981	-3.806	3.49518	-4.311	3.54222	-4.485	3.39287	-4.412	3.50769	-4.495	3.74441	-4.473	3.43327	-4.55
3.16844	-3.985	3.51233	-3.752	3.52784	-4.308	3.57532	-4.49	3.42457	-4.435	3.54047	-4.468	3.7794	-4.49	3.46536	-4.556
3.19778	-3.99	3.54485	-3.805	3.56051	-4.335	3.60843	-4.531	3.45628	-4.439	3.57326	-4.478	3.8144	-4.465	3.49745	-4.544
3.22712	-3.996	3.57737	-3.79	3.59317	-4.354	3.64153	-4.498	3.48799	-4.453	3.60604	-4.484	3.84939	-4.448	3.52953	-4.559
3.25646	-3.97	3.60989	-3.777	3.62584	-4.315	3.67464	-4.509	3.5197	-4.447	3.63882	-4.472	3.88439	-4.497	3.56162	-4.569
3.28579	-4.004	3.64242	-3.844	3.6585	-4.327	3.70774	-4.499	3.55141	-4.457	3.6716	-4.478	3.91938	-4.43	3.59371	-4.557
3.31513	-3.996	3.67494	-3.793	3.69117	-4.272	3.74085	-4.472	3.58312	-4.421	3.70438	-4.501	3.95437	-4.463	3.62579	-4.562
3.34447	-3.955	3.70746	-3.786	3.72384	-4.298	3.77395	-4.494	3.61483	-4.405	3.73717	-4.513	3.98937	-4.444	3.65788	-4.565
3.37381	-3.96	3.73998	-3.768	3.7565	-4.365	3.80706	-4.483	3.64654	-4.447	3.76995	-4.462	4.02436	-4.489	3.68997	-4.533
3.40314	-3.978	3.7725	-3.811	3.78917	-4.328	3.84016	-4.51	3.67825	-4.41	3.80273	-4.479	4.05936	-4.492	3.72205	-4.575
3.43248	-3.974	3.80502	-3.781	3.82183	-4.374	3.87327	-4.493	3.70996	-4.427	3.83551	-4.505	4.09435	-4.419	3.75414	-4.592
3.46182	-3.995	3.83755	-3.803	3.8545	-4.293	3.90637	-4.495	3.74166	-4.463	3.86829	-4.461	4.12935	-4.435	3.78623	-4.561
3.49116	-3.99	3.87007	-3.765	3.88716	-4.322	3.93948	-4.465	3.77337	-4.451	3.90108	-4.495	4.16434	-4.44	3.81831	-4.559
3.52049	-3.991	3.90259	-3.795	3.91983	-4.321	3.97258	-4.509	3.80508	-4.423	3.93386	-4.499	4.19934	-4.473	3.8504	-4.495
3.54983	-3.968	3.93511	-3.86	3.95249	-4.34	4.00569	-4.461	3.83679	-4.435	3.96664	-4.476	4.23433	-4.477	3.88249	-4.527
3.57917	-3.997	3.96763	-3.81	3.98516	-4.328	4.03879	-4.524	3.8685	-4.435	3.99942	-4.5	4.26932	-4.485	3.91457	-4.525
3.60851	-4.008	4.00015	-3.865	4.01782	-4.292	4.0719	-4.52	3.90021	-4.43	4.03221	-4.448	4.30432	-4.456	3.94666	-4.552
3.63784	-3.996	4.03268	-3.811	4.05049	-4.299	4.105	-4.489	3.93192	-4.42	4.06499	-4.454	4.33931	-4.458	3.97875	-4.569
3.66718	-3.98	4.0652	-3.813	4.08315	-4.346	4.13811	-4.478	3.96363	-4.436	4.09777	-4.476	4.37431	-4.479	4.01083	-4.595
3.69652	-3.958	4.09772	-3.855	4.11582	-4.343	4.17121	-4.51	3.99534	-4.439	4.13055	-4.421	4.4093	-4.498	4.04292	-4.535
3.72586	-3.976	4.13024	-3.833	4.14848	-4.321	4.20432	-4.472	4.02705	-4.452	4.16333	-4.501	4.4443	-4.447	4.07501	-4.574
3.75519	-3.966	4.16276	-3.826	4.18115	-4.342	4.23742	-4.43	4.05875	-4.403	4.19612	-4.516	4.47929	-4.464	4.10709	-4.525
3.78453	-3.962	4.19528	-3.836	4.21381	-4.317	4.27053	-4.521	4.09046	-4.428	4.2289	-4.493	4.51429	-4.444	4.13918	-4.578
3.81387	-4.026	4.2278	-3.801	4.24648	-4.318	4.30363	-4.516	4.12217	-4.439	4.26168	-4.442	4.54928	-4.397	4.17127	-4.608
3.84321	-3.999	4.26033	-3.83	4.27914	-4.39	4.33674	-4.508	4.15388	-4.417	4.29446	-4.483	4.58427	-4.49	4.20335	-4.603
3.87254	-3.997	4.29285	-3.838	4.31181	-4.328	4.36984	-4.479	4.18559	-4.424	4.32725	-4.45	4.61927	-4.498	4.23544	-4.51
3.90188	-3.997	4.32537	-3.835	4.34447	-4.34	4.40295	-4.46	4.2173	-4.435	4.36003	-4.487	4.65426	-4.488	4.26753	-4.602
3.93122	-4.022	4.35789	-3.828	4.37714	-4.332	4.43605	-4.479	4.24901	-4.436	4.39281	-4.482	4.68926	-4.464	4.29961	-4.586
3.96056	-4.01	4.39041	-3.879	4.4098	-4.356	4.46915	-4.471	4.28072	-4.455	4.42559	-4.47	4.72425	-4.466	4.3317	-4.585
3.98989	-4	4.42293	-3.832	4.44247	-4.336	4.50226	-4.51	4.31243	-4.427	4.45837	-4.504	4.75925	-4.467	4.36379	-4.578
4.01923	-4.069	4.45546	-3.863	4.47514	-4.369	4.53536	-4.517	4.34414	-4.428	4.49116	-4.497	4.79424	-4.504	4.39587	-4.562
4.04857	-3.999	4.48798	-3.788	4.5078	-4.307	4.56847	-4.492	4.37584	-4.405	4.52394	-4.488	4.82924	-4.399	4.42796	-4.578
4.0779	-3.948	4.5205	-3.887	4.54047	-4.284	4.60157	-4.509	4.40755	-4.423	4.55672	-4.496	4.86423	-4.468	4.46005	-4.55
4.10724	-3.966	4.55302	-3.868	4.57313	-4.361	4.63468	-4.511	4.43926	-4.374	4.5895	-4.545	4.89922	-4.405	4.49213	-4.574
4.13658	-4.002	4.58554	-3.862	4.6058	-4.335	4.66778	-4.474	4.47097	-4.442	4.62228	-4.445	4.93422	-4.495	4.52422	-4.535
4.16592	-3.984	4.61806	-3.867	4.63846	-4.345	4.70089	-4.537	4.50268	-4.422	4.65507	-4.492	4.96921	-4.492	4.55631	-4.543
4.19525	-3.986	4.65058	-3.835	4.67113	-4.356	4.73399	-4.497	4.53439	-4.444	4.68785	-4.505	5.00421	-4.471	4.58839	-4.514
4.22459	-3.998	4.68311	-3.817	4.70379	-4.366	4.7671	-4.56	4.5661	-4.464	4.72063	-4.483	5.0392	-4.502	4.62048	-4.536
4.25393	-3.983	4.71563	-3.83	4.73646	-4.325	4.8002	-4.542	4.59781	-4.412	4.75341	-4.521	5.0742	-4.448	4.65257	-4.581
4.28327	-3.981	4.74815	-3.829	4.76912	-4.332	4.83331	-4.544	4.62952	-4.461	4.7862	-4.516	5.10919	-4.438	4.68465	-4.582
4.3126	-3.95	4.78067	-3.828	4.80179	-4.351	4.86641	-4.495	4.66123	-4.428	4.81898	-4.511	5.14419	-4.477	4.71674	-4.582
4.34194	-3.976	4.81319	-3.847	4.83445	-4.397	4.89952	-4.52	4.69293	-4.396	4.85176	-4.471	5.17918	-4.473	4.74883	-4.591
4.37128	-3.973	4.84571	-3.826	4.86712	-4.323	4.93262	-4.466	4.72464	-4.434	4.88454	-4.486	5.21417	-4.485	4.78091	-4.54
4.40062	-3.978	4.87824	-3.855	4.89978	-4.362	4.96573	-4.502	4.75635	-4.355	4.91732	-4.495	5.24917	-4.45	4.813	-4.601
4.42995	-3.94	4.91076	-3.815	4.93245	-4.33	4.99883	-4.464	4.78806	-4.413	4.95011	-4.48	5.28416	-4.448	4.84509	-4.606
4.45929	-4.01	4.94328	-3.845	4.96511	-4.331	5.03194	-4.43	4.81977	-4.443	4.98289	-4.488	5.31916	-4.44	4.87717	-4.563
4.48863	-4.007	4.9758	-3.879	4.99778	-4.351	5.06504	-4.491	4.85148	-4.434	5.01567	-4.482	5.35415	-4.425	4.90926	-4.544
4.51797	-3.99	5.00832	-3.89	5.03044	-4.306	5.09815	-4.502	4.88319	-4.418	5.04845	-4.54	5.38915	-4.516	4.94135	-4.554
4.5473	-3.924	5.04084	-3.888	5.06311	-4.404	5.13125	-4.488	4.9149	-4.426	5.08123	-4.51	5.42414	-4.427	4.97343	-4.587
4.57664	-3.995	5.07337	-3.84	5.09577	-4.318	5.16436	-4.509	4.94661	-4.419	5.11402	-4.493	5.45914	-4.451	5.00552	-4.558
4.60598	-3.998	5.10589	-3.87	5.12844	-4.333	5.19746	-4.499	4.97832	-4.402	5.1468	-4.486	5.49413	-4.439	5.03761	-4.544
4.63532	-4.035	5.13841	-3.844	5.16111	-4.344	5.23057	-4.446	5.01003	-4.43	5.17958	-4.475	5.52912	-4.419	5.06969	-4.557
4.66465	-4.044	5.17093	-3.896	5.19377	-4.347	5.26367	-4.45	5.04173	-4.4	5.21236	-4.496	5.56412	-4.456	5.10178	-4.543
4.69399	-4.05	5.20345	-3.899	5.22644	-4.319	5.29678	-4.497	5.07344	-4.43	5.24515	-4.533	5.59911	-4.424	5.13387	-4.55
4.72333	-4.001	5.23597	-3.847	5.2591	-4.387	5.32988	-4.482	5.10515	-4.402	5.27793	-4.493	5.63411	-4.432	5.16595	-4.531
4.75267	-4.01	5.26849	-3.86	5.29177	-4.308	5.36299	-4.452	5.13686	-4.439	5.31071	-4.516	5.6691	-4.415	5.19804	-4.59
4.782	-3.964	5.30102	-3.926	5.32443	-4.323	5.39609	-4.538	5.16857	-4.435	5.34349	-4.541	5.7041	-4.431	5.23013	-4.534
4.81134	-3.996	5.33354	-3.907	5.3571	-4.367	5.4292	-4.518	5.20028	-4.445	5.37627	-4.479	5.73909	-4.411	5.26221	-4.526
4.84068	-4.041	5.36606	-3.94	5.38976	-4.33	5.4623	-4.503	5.23199	-4.417	5.40906	-4.57	5.77409	-4.376	5.2943	-4.561
4.87002	-4.071	5.39858	-3.883	5.42243	-4.374	5.49541	-4.493	5.2637	-4.453	5.44184	-4.483	5.80908	-4.363	5.32639	-4.518
4.89935	-4.001	5.4311	-3.885	5.45509	-4.363	5.52851	-4.498	5.29541	-4.449	5.47462	-4.515	5.84408	-4.406	5.35847	-4.518
4.92869	-4.022	5.46362	-3.896	5.48776	-4.356	5.56162	-4.535	5.32712	-4.418	5.5074	-4.534	5.87907	-4.396	5.39056	-4.558
4.95803	-3.995	5.49615	-3.912	5.52042	-4.326	5.59472	-4.507	5.35882	-4.416	5.54019	-4.528	5.91406	-4.407	5.42265	-4.551
4.98737	-3.986	5.52867	-3.893	5.55309	-4.344	5.62782	-4.509	5.39053	-4.46	5.57297	-4.549	5.94906	-4.415	5.45473	-4.526
5.0167	-3.998	5.56119	-3.969	5.58575	-4.341	5.66093	-4.535	5.42224	-4.471	5.60575	-4.493	5.98405	-4.414	5.48682	-4.549
5.04604	-4.003	5.59371	-3.93	5.61842	-4.373	5.69403	-4.474	5.45395	-4.425	5.63853	-4.52	6.01905	-4.417	5.51891	-4.524
5.07538	-3.991	5.62623	-3.921	5.65108	-4.291	5.72714	-4.492	5.48566	-4.434	5.67131	-4.517	6.05404	-4.392	5.55099	-4.557
5.10472	-3.989	5.65875	-3.913	5.68375	-4.336	5.76024	-4.507	5.51737	-4.437	5.7041	-4.516	6.08904	-4.42	5.58308	-4.555
5.13405	-3.977	5.69128	-3.884	5.71641	-4.341	5.79335	-4.51	5.54908	-4.428	5.73688	-4.518	6.12403	-4.433	5.61517	-4.557
5.16339	-4.01	5.7238	-3.891	5.74908	-4.328	5.82645	-4.482	5.58079	-4.389	5.76966	-4.505	6.15903	-4.401	5.64725	-4.581
5.19273	-4.006	5.75632	-3.903	5.78174	-4.341	5.85956	-4.453	5.6125	-4.45	5.80244	-4.507	6.19402	-4.481	5.67934	-4.54
5.22207	-4.011	5.78884	-3.903	5.81441	-4.349	5.89266	-4.483	5.64421	-4.435	5.83522	-4.5	6.22901	-4.459	5.71143	-4.508
5.2514	-4.018	5.82136	-3.926	5.84707	-4.36	5.92577	-4.455	5.67591	-4.4	5.86801	-4.502	6.26401	-4.429	5.74351	-4.538
5.28074	-3.973	5.85388	-3.897	5.87974	-4.397	5.95887	-4.517	5.70762	-4.419	5.90079	-4.482	6.299	-4.437	5.7756	-4.566
5.31008	-4.005	5.8864	-3.905	5.91241	-4.326	5.99198	-4.492	5.73933	-4.394	5.93357	-4.533	6.334	-4.484	5.80769	-4.527
5.33942	-4.03	5.91893	-3.985	5.94507	-4.339	6.02508	-4.496	5.77104	-4.413	5.96635	-4.541	6.36899	-4.431	5.83977	-4.521
5.36875	-3.991	5.95145	-3.901	5.97774	-4.305	6.05819	-4.519	5.80275	-4.443	5.99914	-4.494	6.40399	-4.492	5.87186	-4.546
5.39809	-4.034	5.98397	-3.918	6.0104	-4.345	6.09129	-4.471	5.83446	-4.42	6.03192	-4.503	6.43898	-4.502	5.90395	-4.533
5.42743	-3.972	6.01649	-3.943	6.04307	-4.341	6.1244	-4.484	5.86617	-4.472	6.0647	-4.508	6.47398	-4.435	5.93603	-4.509
5.45676	-3.99	6.04901	-3.934	6.07573	-4.364	6.1575	-4.471	5.89788	-4.45	6.09748	-4.497	6.50897	-4.519	5.96812	-4.573
5.4861	-4.029	6.08153	-3.935	6.1084	-4.332	6.19061	-4.455	5.92959	-4.432	6.13026	-4.523	6.54396	-4.457	6.00021	-4.59
5.51544	-4.006	6.11406	-3.92	6.14106	-4.303	6.22371	-4.479	5.9613	-4.39	6.16305	-4.551	6.57896	-4.467	6.03229	-4.557
5.54478	-3.984	6.14658	-3.941	6.17373	-4.372	6.25682	-4.494	5.993	-4.45	6.19583	-4.511	6.61395	-4.442	6.06438	-4.56
5.57411	-4.017	6.1791	-3.979	6.20639	-4.368	6.28992	-4.475	6.02471	-4.443	6.22861	-4.512	6.64895	-4.468	6.09647	-4.524
5.60345	-4.008	6.21162	-3.907	6.23906	-4.332	6.32303	-4.484	6.05642	-4.425	6.26139	-4.526	6.68394	-4.454	6.12855	-4.538
5.63279	-4.008	6.24414	-3.926	6.27172	-4.33	6.35613	-4.446	6.08813	-4.441	6.29417	-4.525	6.71894	-4.415	6.16064	-4.551
5.66213	-4.014	6.27666	-3.894	6.30439	-4.421	6.38924	-4.473	6.11984	-4.454	6.32696	-4.482	6.75393	-4.448	6.19273	-4.575
5.69146	-4.026	6.30919	-3.918	6.33705	-4.385	6.42234	-4.458	6.15155	-4.457	6.35974	-4.525	6.78893	-4.515	6.22481	-4.532
5.7208	-4.041	6.34171	-3.923	6.36972	-4.359	6.45545	-4.455	6.18326	-4.427	6.39252	-4.522	6.82392	-4.454	6.2569	-4.531
5.75014	-4.033	6.37423	-3.963	6.40238	-4.378	6.48855	-4.492	6.21497	-4.442	6.4253	-4.492	6.85891	-4.495	6.28899	-4.569
5.77948	-4.028	6.40675	-3.945	6.43505	-4.388	6.52166	-4.501	6.24668	-4.429	6.45809	-4.56	6.89391	-4.471	6.32107	-4.552
5.80881	-4.042	6.43927	-3.951	6.46771	-4.36	6.55476	-4.475	6.27839	-4.4	6.49087	-4.559	6.9289	-4.434	6.35316	-4.567
5.83815	-4.01	6.47179	-3.935	6.50038	-4.355	6.58787	-4.473	6.31009	-4.424	6.52365	-4.497	6.9639	-4.491	6.38525	-4.518
5.86749	-4.094	6.50431	-3.97	6.53304	-4.379	6.62097	-4.474	6.3418	-4.39	6.55643	-4.511	6.99889	-4.495	6.41733	-4.521
5.89683	-3.999	6.53684	-3.961	6.56571	-4.316	6.65408	-4.496	6.37351	-4.445	6.58921	-4.519	7.03389	-4.434	6.44942	-4.591
5.92616	-4.028	6.56936	-3.934	6.59837	-4.321	6.68718	-4.48	6.40522	-4.417	6.622	-4.55	7.06888	-4.449	6.48151	-4.52
5.9555	-4.02	6.60188	-3.984	6.63104	-4.359	6.72028	-4.486	6.43693	-4.417	6.65478	-4.532	7.10388	-4.408	6.51359	-4.536
5.98484	-4.066	6.6344	-3.992	6.66371	-4.372	6.75339	-4.505	6.46864	-4.427	6.68756	-4.497	7.13887	-4.446	6.54568	-4.521
6.01418	-4.007	6.66692	-3.956	6.69637	-4.364	6.78649	-4.442	6.50035	-4.424	6.72034	-4.523	7.17386	-4.421	6.57777	-4.577
6.04351	-4.007	6.69944	-3.941	6.72904	-4.386	6.8196	-4.494	6.53206	-4.418	6.75313	-4.468	7.20886	-4.4	6.60985	-4.499
6.07285	-4.009	6.73197	-3.948	6.7617	-4.359	6.8527	-4.452	6.56377	-4.401	6.78591	-4.508	7.24385	-4.42	6.64194	-4.533
6.10219	-4.077	6.76449	-3.968	6.79437	-4.386	6.88581	-4.457	6.59548	-4.436	6.81869	-4.482	7.27885	-4.39	6.67403	-4.588
6.13153	-4.048	6.79701	-3.98	6.82703	-4.374	6.91891	-4.462	6.62719	-4.417	6.85147	-4.474	7.31384	-4.309	6.70611	-4.555
6.16086	-4.036	6.82953	-3.946	6.8597	-4.348	6.95202	-4.448	6.65889	-4.467	6.88425	-4.48	7.34884	-4.354	6.7382	-4.524
6.1902	-4.037	6.86205	-3.943	6.89236	-4.318	6.98512	-4.465	6.6906	-4.488	6.91704	-4.503	7.38383	-4.281	6.77029	-4.599
6.21954	-4.037	6.89457	-3.941	6.92503	-4.326	7.01823	-4.486	6.72231	-4.497	6.94982	-4.505	7.41883	-4.289	6.80237	-4.566
6.24888	-4.047	6.9271	-3.954	6.95769	-4.347	7.05133	-4.455	6.75402	-4.451	6.9826	-4.47	7.45382	-4.224	6.83446	-4.608
6.27821	-4.021	6.95962	-3.946	6.99036	-4.346	7.08444	-4.459	6.78573	-4.419	7.01538	-4.52	7.48881	-4.213	6.86655	-4.587
6.30755	-4.033	6.99214	-3.913	7.02302	-4.347	7.11754	-4.474	6.81744	-4.44	7.04816	-4.454	7.52381	-4.137	6.89863	-4.591
6.33689	-3.992	7.02466	-3.934	7.05569	-4.357	7.15065	-4.48	6.84915	-4.402	7.08095	-4.529	7.5588	-4.01	6.93072	-4.572
6.36623	-4.043	7.05718	-3.948	7.08835	-4.384	7.18375	-4.495	6.88086	-4.399	7.11373	-4.457	7.5938	-4.001	6.96281	-4.548
6.39556	-4.007	7.0897	-3.968	7.12102	-4.375	7.21686	-4.467	6.91257	-4.488	7.14651	-4.485	7.62879	-3.881	6.99489	-4.605
6.4249	-4.055	7.12222	-3.99	7.15368	-4.377	7.24996	-4.491	6.94428	-4.445	7.17929	-4.45	7.66379	-3.849	7.02698	-4.604
6.45424	-4.029	7.15475	-3.892	7.18635	-4.349	7.28307	-4.485	6.97598	-4.407	7.21208	-4.422	7.69878	-3.749	7.05907	-4.568
6.48358	-4.037	7.18727	-3.971	7.21901	-4.37	7.31617	-4.508	7.00769	-4.47	7.24486	-4.426	7.73378	-3.685	7.09115	-4.557
6.51291	-4.009	7.21979	-3.948	7.25168	-4.332	7.34928	-4.482	7.0394	-4.421	7.27764	-4.448	7.76877	-3.63	7.12324	-4.567
6.54225	-4.065	7.25231	-3.964	7.28434	-4.317	7.38238	-4.457	7.07111	-4.437	7.31042	-4.392	7.80376	-3.534	7.15533	-4.562
6.57159	-4.054	7.28483	-3.964	7.31701	-4.339	7.41549	-4.459	7.10282	-4.449	7.3432	-4.34	7.83876	-3.456	7.18741	-4.571
6.60093	-4.028	7.31735	-3.994	7.34967	-4.375	7.44859	-4.511	7.13453	-4.418	7.37599	-4.385	7.87375	-3.366	7.2195	-4.616
6.63026	-4.072	7.34988	-3.966	7.38234	-4.321	7.4817	-4.494	7.16624	-4.47	7.40877	-4.402	7.90875	-3.351	7.25159	-4.589
6.6596	-4.065	7.3824	-3.984	7.41501	-4.363	7.5148	-4.471	7.19795	-4.434	7.44155	-4.391	7.94374	-3.285	7.28367	-4.593
6.68894	-4.025	7.41492	-3.993	7.44767	-4.373	7.54791	-4.481	7.22966	-4.439	7.47433	-4.321	7.97874	-3.204	7.31576	-4.575
6.71827	-4.009	7.44744	-3.968	7.48034	-4.374	7.58101	-4.483	7.26137	-4.42	7.50711	-4.336	8.01373	-3.146	7.34785	-4.524
6.74761	-4.022	7.47996	-3.977	7.513	-4.406	7.61412	-4.482	7.29307	-4.437	7.5399	-4.284	8.04873	-3.078	7.37993	-4.592
6.77695	-4.094	7.51248	-3.949	7.54567	-4.381	7.64722	-4.449	7.32478	-4.441	7.57268	-4.272	8.08372	-3.011	7.41202	-4.566
6.80629	-4.082	7.545	-3.974	7.57833	-4.383	7.68033	-4.459	7.35649	-4.468	7.60546	-4.215	8.11871	-2.99	7.44411	-4.57
6.83562	-4.067	7.57753	-4.008	7.611	-4.393	7.71343	-4.442	7.3882	-4.435	7.63824	-4.131	8.15371	-2.963	7.47619	-4.573
6.86496	-4.062	7.61005	-3.984	7.64366	-4.4	7.74654	-4.443	7.41991	-4.424	7.67103	-4.106	8.1887	-2.938	7.50828	-4.598
6.8943	-4.084	7.64257	-3.962	7.67633	-4.404	7.77964	-4.419	7.45162	-4.43	7.70381	-4.019	8.2237	-2.933	7.54037	-4.544
6.92364	-4.047	7.67509	-3.971	7.70899	-4.338	7.81274	-4.45	7.48333	-4.448	7.73659	-3.861	8.25869	-2.843	7.57245	-4.59
6.95297	-4.098	7.70761	-4.02	7.74166	-4.342	7.84585	-4.415	7.51504	-4.448	7.76937	-3.751	8.29369	-2.909	7.60454	-4.614
6.98231	-4.085	7.74013	-3.925	7.77432	-4.359	7.87895	-4.434	7.54675	-4.456	7.80215	-3.601	8.32868	-2.901	7.63663	-4.632
7.01165	-4.045	7.77266	-3.987	7.80699	-4.366	7.91206	-4.408	7.57846	-4.411	7.83494	-3.439	8.36368	-2.819	7.66871	-4.598
7.04099	-4.061	7.80518	-3.998	7.83965	-4.389	7.94516	-4.433	7.61016	-4.486	7.86772	-3.205	8.39867	-2.818	7.7008	-4.615
7.07032	-4.073	7.8377	-3.951	7.87232	-4.359	7.97827	-4.421	7.64187	-4.457	7.9005	-2.953	8.43367	-2.799	7.73289	-4.569
7.09966	-4.059	7.87022	-3.976	7.90498	-4.328	8.01137	-4.379	7.67358	-4.402	7.93328	-2.792	8.46866	-2.747	7.76497	-4.625
7.129	-4.044	7.90274	-3.997	7.93765	-4.354	8.04448	-4.369	7.70529	-4.432	7.96607	-2.55	8.50365	-2.748	7.79706	-4.618
7.15834	-4.045	7.93526	-3.961	7.97031	-4.378	8.07758	-4.404	7.737	-4.42	7.99885	-2.122	8.53865	-2.693	7.82915	-4.577
7.18767	-4.07	7.96779	-4.008	8.00298	-4.381	8.11069	-4.41	7.76871	-4.449	8.03163	-2.034	8.57364	-2.697	7.86123	-4.592
7.21701	-4.061	8.00031	-3.976	8.03564	-4.379	8.14379	-4.415	7.80042	-4.448	8.06441	-1.764	8.60864	-2.649	7.89332	-4.554
7.24635	-4.054	8.03283	-4.044	8.06831	-4.374	8.1769	-4.422	7.83213	-4.423	8.09719	-1.72	8.64363	-2.659	7.92541	-4.592
7.27569	-4.087	8.06535	-4.029	8.10098	-4.349	8.21	-4.351	7.86384	-4.388	8.12998	-0.967	8.67863	-2.667	7.95749	-4.54
7.30502	-4.062	8.09787	-4.035	8.13364	-4.412	8.24311	-4.345	7.89555	-4.399	8.16276	-0.987	8.71362	-2.597	7.98958	-4.572
7.33436	-4.044	8.13039	-3.986	8.16631	-4.368	8.27621	-4.434	7.92725	-4.365	8.19554	-0.906	8.74862	-2.565	8.02167	-4.567
7.3637	-4.028	8.16291	-3.954	8.19897	-4.35	8.30932	-4.383	7.95896	-4.364	8.22832	-0.725	8.78361	-2.549	8.05375	-4.584
7.39304	-4.022	8.19544	-3.963	8.23164	-4.323	8.34242	-4.385	7.99067	-4.338	8.2611	-0.649	8.8186	-2.473	8.08584	-4.557
7.42237	-4.078	8.22796	-4.007	8.2643	-4.358	8.37553	-4.397	8.02238	-4.354	8.29389	-0.435	8.8536	-2.485	8.11793	-4.595
7.45171	-4.068	8.26048	-3.966	8.29697	-4.367	8.40863	-4.423	8.05409	-4.346	8.32667	-0.386	8.88859	-2.436	8.15001	-4.569
7.48105	-4.095	8.293	-4.013	8.32963	-4.33	8.44174	-4.383	8.0858	-4.336	8.35945	-0.293	8.92359	-2.353	8.1821	-4.58
7.51039	-4.024	8.32552	-3.966	8.3623	-4.329	8.47484	-4.405	8.11751	-4.321	8.39223	-0.244	8.95858	-2.311	8.21419	-4.576
7.53972	-4.033	8.35804	-3.996	8.39496	-4.335	8.50795	-4.42	8.14922	-4.315	8.42502	-0.147	8.99358	-2.293	8.24627	-4.554
7.56906	-4.069	8.39057	-3.988	8.42763	-4.331	8.54105	-4.387	8.18093	-4.297	8.4578	-0.157	9.02857	-2.194	8.27836	-4.526
7.5984	-4.071	8.42309	-3.996	8.46029	-4.367	8.57416	-4.403	8.21264	-4.311	8.49058	-0.166	9.06357	-2.214	8.31045	-4.616
7.62774	-4.079	8.45561	-3.991	8.49296	-4.326	8.60726	-4.413	8.24435	-4.313	8.52336	-0.17	9.09856	-2.023	8.34253	-4.542
7.65707	-4.045	8.48813	-3.965	8.52562	-4.312	8.64037	-4.332	8.27605	-4.315	8.55614	-0.173	9.13355	-2.095	8.37462	-4.559
7.68641	-4.003	8.52065	-3.96	8.55829	-4.379	8.67347	-4.443	8.30776	-4.322	8.58893	-0.166	9.16855	-1.979	8.40671	-4.529
7.71575	-4.045	8.55317	-3.976	8.59095	-4.338	8.70658	-4.392	8.33947	-4.37	8.62171	-0.186	9.20354	-1.922	8.43879	-4.573
7.74509	-4.025	8.5857	-4.014	8.62362	-4.341	8.73968	-4.446	8.37118	-4.316	8.65449	-0.16	9.23854	-1.888	8.47088	-4.591
7.77442	-4.022	8.61822	-3.958	8.65628	-4.363	8.77279	-4.392	8.40289	-4.326	8.68727	-0.166	9.27353	-1.796	8.50297	-4.595
7.80376	-4.062	8.65074	-4.02	8.68895	-4.342	8.80589	-4.398	8.4346	-4.305	8.72005	-0.226	9.30853	-1.741	8.53505	-4.559
7.8331	-4.024	8.68326	-3.982	8.72161	-4.36	8.839	-4.428	8.46631	-4.309	8.75284	-0.161	9.34352	-1.627	8.56714	-4.587
7.86244	-4.035	8.71578	-3.982	8.75428	-4.366	8.8721	-4.439	8.49802	-4.254	8.78562	-0.41	9.37852	-1.535	8.59923	-4.565
7.89177	-4.052	8.7483	-3.992	8.78694	-4.34	8.90521	-4.425	8.52973	-4.273	8.8184	0.437	9.41351	-1.42	8.63131	-4.588
7.92111	-4.104	8.78082	-3.961	8.81961	-4.317	8.93831	-4.433	8.56144	-4.323	8.85118	0.106	9.4485	-1.387	8.6634	-4.582
7.95045	-4.008	8.81335	-4.019	8.85228	-4.335	8.97141	-4.426	8.59314	-4.353	8.88397	-0.107	9.4835	-1.261	8.69549	-4.554
7.97979	-4.006	8.84587	-4.002	8.88494	-4.381	9.00452	-4.46	8.62485	-4.346	8.91675	-0.269	9.51849	-1.067	8.72757	-4.595
8.00912	-4.057	8.87839	-4.025	8.91761	-4.331	9.03762	-4.443	8.65656	-4.313	8.94953	-0.355	9.55349	-1.06	8.75966	-4.55
8.03846	-4.008	8.91091	-4.024	8.95027	-4.331	9.07073	-4.425	8.68827	-4.304	8.98231	-0.426	9.58848	-0.922	8.79175	-4.579
8.0678	-4.036	8.94343	-3.991	8.98294	-4.396	9.10383	-4.467	8.71998	-4.255	9.01509	-0.501	9.62348	-0.91	8.82383	-4.595
8.09713	-4.105	8.97595	-3.973	9.0156	-4.366	9.13694	-4.461	8.75169	-3.814	9.04788	-0.541	9.65847	-0.796	8.85592	-4.554
8.12647	-4.027	9.00848	-3.998	9.04827	-4.375	9.17004	-4.458	8.7834	-4.068	9.08066	-0.659	9.69347	-0.654	8.88801	-4.541
8.15581	-4.068	9.041	-4.04	9.08093	-4.37	9.20315	-4.455	8.81511	-4.188	9.11344	-0.713	9.72846	-0.526	8.92009	-4.526
8.18515	-4.069	9.07352	-4.006	9.1136	-4.388	9.23625	-4.475	8.84682	-4.231	9.14622	-0.789	9.76345	-0.417	8.95218	-4.565
8.21448	-4.057	9.10604	-4.016	9.14626	-4.423	9.26936	-4.459	8.87853	-4.265	9.179	-0.853	9.79845	-0.362	8.98427	-4.598
8.24382	-4.08	9.13856	-4.012	9.17893	-4.356	9.30246	-4.448	8.91023	-4.28	9.21179	-0.854	9.83344	-0.178	9.01635	-4.589
8.27316	-4.074	9.17108	-4.082	9.21159	-4.437	9.33557	-4.442	8.94194	-4.306	9.24457	-0.873	9.86844	-0.057	9.04844	-4.555
8.3025	-4.053	9.20361	-3.999	9.24426	-4.4	9.36867	-4.445	8.97365	-4.357	9.27735	-0.949	9.90343	0.073	9.08053	-4.543
8.33183	-4.061	9.23613	-4.012	9.27692	-4.409	9.40178	-4.428	9.00536	-4.345	9.31013	-0.948	9.93843	0.206	9.11261	-4.561
8.36117	-4.044	9.26865	-4.047	9.30959	-4.377	9.43488	-4.475	9.03707	-4.349	9.34292	-0.971	9.97342	0.319	9.1447	-4.594
8.39051	-4.027	9.30117	-3.968	9.34225	-4.37	9.46799	-4.431	9.06878	-4.421	9.3757	-0.989	10.0084	0.429	9.17679	-4.567
8.41985	-4.002	9.33369	-4.032	9.37492	-4.409	9.50109	-4.465	9.10049	-4.367	9.40848	-0.983	10.0434	0.624	9.20887	-4.527
8.44918	-4.052	9.36621	-4.02	9.40758	-4.403	9.5342	-4.51	9.1322	-4.409	9.44126	-1.008	10.0784	0.767	9.24096	-4.514
8.47852	-4.074	9.39873	-3.991	9.44025	-4.399	9.5673	-4.422	9.16391	-4.402	9.47404	-0.912	10.1134	0.9	9.27305	-4.567
8.50786	-4.044	9.43126	-4.035	9.47291	-4.387	9.60041	-4.412	9.19562	-4.432	9.50683	-0.907	10.1484	1.066	9.30513	-4.566
8.5372	-4.039	9.46378	-3.996	9.50558	-4.383	9.63351	-4.482	9.22732	-4.408	9.53961	-0.918	10.1834	1.192	9.33722	-4.602
8.56653	-4.091	9.4963	-4.023	9.53824	-4.349	9.66662	-4.425	9.25903	-4.408	9.57239	-0.858	10.2184	1.366	9.36931	-4.537
8.59587	-4.056	9.52882	-4.095	9.57091	-4.369	9.69972	-4.481	9.29074	-4.431	9.60517	-0.841	10.2534	1.525	9.40139	-4.589
8.62521	-4.024	9.56134	-4.02	9.60358	-4.357	9.73283	-4.401	9.32245	-4.422	9.63796	-0.797	10.2884	1.734	9.43348	-4.557
8.65455	-4.085	9.59386	-4.026	9.63624	-4.404	9.76593	-4.469	9.35416	-4.418	9.67074	-0.738	10.3234	1.902	9.46557	-4.555
8.68388	-4.067	9.62639	-4.053	9.66891	-4.424	9.79904	-4.437	9.38587	-4.421	9.70352	-0.699	10.3584	2.055	9.49765	-4.546
8.71322	-4.049	9.65891	-4.058	9.70157	-4.44	9.83214	-4.419	9.41758	-4.413	9.7363	-0.691	10.3934	2.286	9.52974	-4.629
8.74256	-4.028	9.69143	-4.023	9.73424	-4.415	9.86525	-4.461	9.44929	-4.409	9.76908	-0.617	10.4283	2.442	9.56183	-4.579
8.7719	-4.04	9.72395	-4.017	9.7669	-4.377	9.89835	-4.465	9.481	-4.42	9.80187	-0.602	10.4633	2.685	9.59391	-4.555
8.80123	-4.035	9.75647	-4.04	9.79957	-4.377	9.93146	-4.473	9.51271	-4.45	9.83465	-0.567	10.4983	2.967	9.626	-4.578
8.83057	-4.043	9.78899	-4.067	9.83223	-4.398	9.96456	-4.481	9.54441	-4.465	9.86743	-0.499	10.5333	3.148	9.65809	-4.534
8.85991	-4.058	9.82152	-3.987	9.8649	-4.415	9.99767	-4.464	9.57612	-4.433	9.90021	-0.398	10.5683	3.413	9.69017	-4.537
8.88925	-4.055	9.85404	-4.051	9.89756	-4.434	10.0308	-4.427	9.60783	-4.396	9.93299	-0.315	10.6033	3.641	9.72226	-4.546
8.91858	-4.131	9.88656	-4.05	9.93023	-4.387	10.0639	-4.46	9.63954	-4.409	9.96578	-0.308	10.6383	3.862	9.75435	-4.554
8.94792	-4.016	9.91908	-4.04	9.96289	-4.417	10.097	-4.476	9.67125	-4.374	9.99856	-0.26	10.6733	4.121	9.78643	-4.583
8.97726	-4.034	9.9516	-4.038	9.99556	-4.402	10.1301	-4.431	9.70296	-4.442	10.0313	-0.147	10.7083	4.353	9.81852	-4.571
9.0066	-4.072	9.98412	-4.061	10.0282	-4.363	10.1632	-4.473	9.73467	-4.413	10.0641	-0.091	10.7433	4.583	9.85061	-4.551
9.03593	-4.057	10.0166	-4.064	10.0609	-4.375	10.1963	-4.455	9.76638	-4.475	10.0969	-0.07	10.7783	4.874	9.88269	-4.556
9.06527	-4.045	10.0492	-4.052	10.0936	-4.413	10.2294	-4.46	9.79809	-4.468	10.1297	0.062	10.8133	5.151	9.91478	-4.554
9.09461	-4.067	10.0817	-4.047	10.1262	-4.399	10.2625	-4.448	9.8298	-4.47	10.1625	0.05	10.8483	5.329	9.94687	-4.565
9.12395	-4.046	10.1142	-4.062	10.1589	-4.396	10.2956	-4.483	9.86151	-4.411	10.1953	0.189	10.8833	5.545	9.97895	-4.571
9.15328	-4.063	10.1467	-4.056	10.1915	-4.417	10.3287	-4.424	9.89321	-4.456	10.228	0.302	10.9183	5.808	10.011	-4.558
9.18262	-4.062	10.1793	-4.034	10.2242	-4.404	10.3618	-4.464	9.92492	-4.44	10.2608	0.339	10.9533	6.01	10.0431	-4.548
9.21196	-4.051	10.2118	-4.096	10.2569	-4.385	10.3949	-4.507	9.95663	-4.408	10.2936	0.373	10.9883	6.256	10.0752	-4.592
9.2413	-4.029	10.2443	-4.045	10.2895	-4.409	10.428	-4.456	9.98834	-4.439	10.3264	0.463	11.0233	6.434	10.1073	-4.598
9.27063	-4.087	10.2768	-4.06	10.3222	-4.366	10.4611	-4.435	10.0201	-4.384	10.3592	0.591	11.0582	6.647	10.1394	-4.592
9.29997	-4.056	10.3093	-4.097	10.3549	-4.402	10.4942	-4.461	10.0518	-4.421	10.3919	0.641	11.0932	6.804	10.1715	-4.525
9.32931	-4.051	10.3419	-4.048	10.3875	-4.377	10.5273	-4.467	10.0835	-4.441	10.4247	0.748	11.1282	6.969	10.2036	-4.558
9.35864	-4.081	10.3744	-4.059	10.4202	-4.298	10.5604	-4.455	10.1152	-4.47	10.4575	0.875	11.1632	7.153	10.2356	-4.539
9.38798	-4.089	10.4069	-4.026	10.4529	-4.347	10.5936	-4.53	10.1469	-4.439	10.4903	0.907	11.1982	7.309	10.2677	-4.586
9.41732	-4.057	10.4394	-4.067	10.4855	-4.388	10.6267	-4.48	10.1786	-4.413	10.5231	1.03	11.2332	7.395	10.2998	-4.583
9.44666	-4.1	10.4719	-4.037	10.5182	-4.404	10.6598	-4.461	10.2103	-4.447	10.5559	1.1	11.2682	7.481	10.3319	-4.571
9.47599	-4.083	10.5045	-4.07	10.5509	-4.358	10.6929	-4.493	10.242	-4.443	10.5886	1.219	11.3032	7.653	10.364	-4.545
9.50533	-4.076	10.537	-4.03	10.5835	-4.408	10.726	-4.45	10.2737	-4.438	10.6214	1.33	11.3382	7.759	10.3961	-4.574
9.53467	-4.108	10.5695	-4.034	10.6162	-4.418	10.7591	-4.507	10.3054	-4.446	10.6542	1.44	11.3732	7.848	10.4282	-4.535
9.56401	-4.078	10.602	-4.03	10.6489	-4.38	10.7922	-4.458	10.3371	-4.477	10.687	1.544	11.4082	7.881	10.4603	-4.597
9.59334	-4.063	10.6346	-4.041	10.6815	-4.404	10.8253	-4.436	10.3688	-4.426	10.7198	1.628	11.4432	8.014	10.4923	-4.523
9.62268	-4.069	10.6671	-4.087	10.7142	-4.397	10.8584	-4.441	10.4006	-4.419	10.7525	1.742	11.4782	8.04	10.5244	-4.569
9.65202	-4.059	10.6996	-4.062	10.7469	-4.363	10.8915	-4.489	10.4323	-4.432	10.7853	1.887	11.5132	8.134	10.5565	-4.519
9.68136	-4.059	10.7321	-4.085	10.7795	-4.351	10.9246	-4.479	10.464	-4.415	10.8181	1.992	11.5482	8.115	10.5886	-4.589
9.71069	-4.079	10.7646	-4.083	10.8122	-4.364	10.9577	-4.478	10.4957	-4.428	10.8509	2.087	11.5832	8.189	10.6207	-4.538
9.74003	-4.104	10.7972	-4.055	10.8449	-4.404	10.9908	-4.47	10.5274	-4.47	10.8837	2.232	11.6182	8.266	10.6528	-4.579
9.76937	-4.11	10.8297	-4.029	10.8775	-4.407	11.0239	-4.459	10.5591	-4.415	10.9165	2.326	11.6532	8.343	10.6849	-4.511
9.79871	-4.082	10.8622	-4.071	10.9102	-4.425	11.057	-4.493	10.5908	-4.446	10.9492	2.47	11.6882	8.397	10.7169	-4.564
9.82804	-4.067	10.8947	-4.091	10.9428	-4.348	11.0901	-4.487	10.6225	-4.418	10.982	2.644	11.7231	8.477	10.749	-4.627
9.85738	-4.114	10.9272	-4.086	10.9755	-4.431	11.1232	-4.463	10.6542	-4.397	11.0148	2.732	11.7581	8.581	10.7811	-4.569
9.88672	-4.097	10.9598	-4.062	11.0082	-4.405	11.1563	-4.456	10.6859	-4.441	11.0476	2.912	11.7931	8.701	10.8132	-4.527
9.91606	-4.045	10.9923	-4.069	11.0408	-4.403	11.1894	-4.493	10.7176	-4.379	11.0804	3.094	11.8281	8.859	10.8453	-4.524
9.94539	-4.045	11.0248	-4.069	11.0735	-4.4	11.2225	-4.441	10.7494	-4.44	11.1132	3.226	11.8631	9.018	10.8774	-4.495
9.97473	-4.065	11.0573	-4.133	11.1062	-4.401	11.2556	-4.447	10.7811	-4.451	11.1459	3.374	11.8981	9.282	10.9095	-4.494
10.0041	-4.061	11.0899	-4.072	11.1388	-4.362	11.2888	-4.485	10.8128	-4.44	11.1787	3.514	11.9331	9.589	10.9416	-4.565
10.0334	-4.03	11.1224	-4.066	11.1715	-4.424	11.3219	-4.441	10.8445	-4.448	11.2115	3.633	11.9681	9.865	10.9736	-4.537
10.0627	-4.098	11.1549	-4.071	11.2042	-4.386	11.355	-4.468	10.8762	-4.387	11.2443	3.819	12.0031	10.334	11.0057	-4.55
10.0921	-4.077	11.1874	-4.054	11.2368	-4.449	11.3881	-4.516	10.9079	-4.407	11.2771	4.01	12.0381	10.789	11.0378	-4.583
10.1214	-4.123	11.2199	-4.051	11.2695	-4.403	11.4212	-4.454	10.9396	-4.435	11.3098	4.161	12.0731	11.343	11.0699	-4.554
10.1508	-4.092	11.2525	-4.046	11.3022	-4.38	11.4543	-4.492	10.9713	-4.476	11.3426	4.352	12.1081	11.953	11.102	-4.551
10.1801	-4.049	11.285	-4.075	11.3348	-4.427	11.4874	-4.469	11.003	-4.434	11.3754	4.508	12.1431	12.747	11.1341	-4.585
10.2094	-4.065	11.3175	-4.012	11.3675	-4.398	11.5205	-4.46	11.0347	-4.424	11.4082	4.681	12.1781	13.643	11.1662	-4.512
10.2388	-4.031	11.35	-4.073	11.4002	-4.383	11.5536	-4.437	11.0664	-4.374	11.441	4.796	12.2131	14.557	11.1982	-4.545
10.2681	-4.096	11.3826	-4.102	11.4328	-4.411	11.5867	-4.45	11.0982	-4.404	11.4738	5.051	12.2481	15.594	11.2303	-4.513
10.2974	-4.046	11.4151	-4.064	11.4655	-4.409	11.6198	-4.485	11.1299	-4.449	11.5065	5.176	12.2831	16.737	11.2624	-4.557
10.3268	-4.052	11.4476	-4.051	11.4982	-4.424	11.6529	-4.481	11.1616	-4.386	11.5393	5.367	12.3181	17.992	11.2945	-4.505
10.3561	-4.051	11.4801	-4.091	11.5308	-4.375	11.686	-4.475	11.1933	-4.424	11.5721	5.499	12.353	19.323	11.3266	-4.474
10.3855	-4.018	11.5126	-4.039	11.5635	-4.419	11.7191	-4.482	11.225	-4.439	11.6049	5.678	12.388	20.668	11.3587	-4.565
10.4148	-4.022	11.5452	-4.056	11.5962	-4.397	11.7522	-4.474	11.2567	-4.426	11.6377	5.86	12.423	22.219	11.3908	-4.492
10.4441	-4.062	11.5777	-4.081	11.6288	-4.396	11.7853	-4.45	11.2884	-4.429	11.6704	6.007	12.458	23.848	11.4229	-4.567
10.4735	-4.012	11.6102	-4.049	11.6615	-4.45	11.8184	-4.486	11.3201	-4.435	11.7032	6.157	12.493	25.413	11.4549	-4.512
10.5028	-4.086	11.6427	-4.065	11.6941	-4.435	11.8515	-4.452	11.3518	-4.465	11.736	6.337	12.528	26.918	11.487	-4.512
10.5321	-4.046	11.6752	-4.118	11.7268	-4.414	11.8846	-4.47	11.3835	-4.397	11.7688	6.5	12.563	28.648	11.5191	-4.511
10.5615	-4.077	11.7078	-4.103	11.7595	-4.417	11.9177	-4.497	11.4152	-4.391	11.8016	6.635	12.598	30.29	11.5512	-4.497
10.5908	-4.065	11.7403	-4.059	11.7921	-4.412	11.9509	-4.484	11.447	-4.388	11.8344	6.774	12.633	31.92	11.5833	-4.527
10.6202	-4.022	11.7728	-4.076	11.8248	-4.437	11.984	-4.517	11.4787	-4.414	11.8671	6.938	12.668	33.529	11.6154	-4.516
10.6495	-4.03	11.8053	-4.139	11.8575	-4.418	12.0171	-4.499	11.5104	-4.393	11.8999	7.106	12.703	35.044	11.6475	-4.531
10.6788	-4.011	11.8379	-4.093	11.8901	-4.412	12.0502	-4.515	11.5421	-4.409	11.9327	7.318	12.738	36.529	11.6795	-4.449
10.7082	-4.106	11.8704	-4.078	11.9228	-4.42	12.0833	-4.49	11.5738	-4.372	11.9655	7.485	12.773	37.959	11.7116	-4.559
10.7375	-4.066	11.9029	-4.082	11.9555	-4.391	12.1164	-4.484	11.6055	-4.363	11.9983	7.654	12.808	39.25	11.7437	-4.522
10.7668	-4.086	11.9354	-4.119	11.9881	-4.401	12.1495	-4.439	11.6372	-4.378	12.0311	7.915	12.843	40.355	11.7758	-4.534
10.7962	-4.076	11.9679	-4.099	12.0208	-4.397	12.1826	-4.465	11.6689	-4.362	12.0638	8.122	12.878	41.334	11.8079	-4.509
10.8255	-4.109	12.0005	-4.11	12.0535	-4.403	12.2157	-4.469	11.7006	-4.388	12.0966	8.353	12.913	42.207	11.84	-4.498
10.8549	-4.043	12.033	-4.085	12.0861	-4.415	12.2488	-4.508	11.7323	-4.383	12.1294	8.628	12.948	43.019	11.8721	-4.481
10.8842	-4.076	12.0655	-4.086	12.1188	-4.406	12.2819	-4.491	11.764	-4.374	12.1622	8.856	12.9829	43.582	11.9042	-4.462
10.9135	-4.075	12.098	-4.074	12.1515	-4.396	12.315	-4.481	11.7958	-4.344	12.195	9.196	13.0179	44.004	11.9362	-4.494
10.9429	-4.065	12.1305	-4.085	12.1841	-4.369	12.3481	-4.502	11.8275	-4.415	12.2277	9.502	13.0529	44.28	11.9683	-4.457
10.9722	-4.062	12.1631	-4.118	12.2168	-4.429	12.3812	-4.473	11.8592	-4.383	12.2605	9.877	13.0879	44.393	12.0004	-4.472
11.0015	-4.104	12.1956	-4.062	12.2495	-4.447	12.4143	-4.466	11.8909	-4.361	12.2933	10.285	13.1229	44.375	12.0325	-4.505
11.0309	-4.094	12.2281	-4.066	12.2821	-4.359	12.4474	-4.519	11.9226	-4.334	12.3261	10.651	13.1579	44.222	12.0646	-4.422
11.0602	-4.053	12.2606	-4.072	12.3148	-4.405	12.4805	-4.505	11.9543	-4.348	12.3589	11.121	13.1929	43.945	12.0967	-4.395
11.0896	-4.104	12.2932	-4.078	12.3475	-4.418	12.5136	-4.485	11.986	-4.325	12.3917	11.55	13.2279	43.598	12.1288	-4.396
11.1189	-4.037	12.3257	-4.063	12.3801	-4.377	12.5467	-4.425	12.0177	-4.333	12.4244	12.047	13.2629	43.049	12.1608	-4.428
11.1482	-4.077	12.3582	-4.091	12.4128	-4.408	12.5798	-4.473	12.0494	-4.37	12.4572	12.514	13.2979	42.376	12.1929	-4.396
11.1776	-4.09	12.3907	-4.118	12.4454	-4.386	12.6129	-4.479	12.0811	-4.326	12.49	13.104	13.3329	41.676	12.225	-4.428
11.2069	-4.071	12.4232	-4.047	12.4781	-4.408	12.6461	-4.493	12.1128	-4.349	12.5228	13.652	13.3679	40.918	12.2571	-4.392
11.2362	-4.092	12.4558	-4.144	12.5108	-4.422	12.6792	-4.506	12.1446	-4.248	12.5556	14.175	13.4029	40.015	12.2892	-4.344
11.2656	-4.086	12.4883	-4.069	12.5434	-4.401	12.7123	-4.457	12.1763	-4.291	12.5883	14.736	13.4379	39.094	12.3213	-4.312
11.2949	-4.069	12.5208	-4.087	12.5761	-4.378	12.7454	-4.481	12.208	-4.273	12.6211	15.272	13.4729	38.1	12.3534	-4.31
11.3243	-4.104	12.5533	-4.076	12.6088	-4.42	12.7785	-4.473	12.2397	-4.276	12.6539	15.807	13.5079	37.038	12.3855	-4.287
11.3536	-4.083	12.5858	-4.078	12.6414	-4.343	12.8116	-4.542	12.2714	-4.302	12.6867	16.357	13.5429	35.941	12.4175	-4.261
11.3829	-4.088	12.6184	-4.103	12.6741	-4.414	12.8447	-4.491	12.3031	-4.238	12.7195	16.959	13.5779	34.75	12.4496	-4.223
11.4123	-4.095	12.6509	-4.056	12.7068	-4.388	12.8778	-4.478	12.3348	-4.253	12.7523	17.375	13.6128	33.641	12.4817	-4.167
11.4416	-4.057	12.6834	-4.073	12.7394	-4.391	12.9109	-4.491	12.3665	-4.286	12.785	17.865	13.6478	32.466	12.5138	-4.177
11.4709	-4.113	12.7159	-4.096	12.7721	-4.391	12.944	-4.452	12.3982	-4.254	12.8178	18.281	13.6828	31.309	12.5459	-4.155
11.5003	-4.14	12.7485	-4.104	12.8048	-4.391	12.9771	-4.452	12.4299	-4.243	12.8506	18.68	13.7178	30.098	12.578	-4.108
11.5296	-4.071	12.781	-4.084	12.8374	-4.377	13.0102	-4.434	12.4616	-4.216	12.8834	19.079	13.7528	28.96	12.6101	-4.062
11.559	-4.082	12.8135	-4.1	12.8701	-4.39	13.0433	-4.479	12.4934	-4.169	12.9162	19.339	13.7878	27.739	12.6421	-4.022
11.5883	-4.072	12.846	-4.103	12.9028	-4.36	13.0764	-4.451	12.5251	-4.178	12.949	19.657	13.8228	26.466	12.6742	-3.963
11.6176	-4.097	12.8785	-4.122	12.9354	-4.428	13.1095	-4.417	12.5568	-4.177	12.9817	19.867	13.8578	25.285	12.7063	-3.915
11.647	-4.11	12.9111	-4.118	12.9681	-4.379	13.1426	-4.444	12.5885	-4.171	13.0145	20.055	13.8928	24.15	12.7384	-3.829
11.6763	-4.092	12.9436	-4.092	13.0008	-4.359	13.1757	-4.441	12.6202	-4.159	13.0473	20.19	13.9278	23.053	12.7705	-3.831
11.7056	-4.097	12.9761	-4.127	13.0334	-4.383	13.2088	-4.421	12.6519	-4.106	13.0801	20.259	13.9628	21.894	12.8026	-3.732
11.735	-4.08	13.0086	-4.093	13.0661	-4.383	13.2419	-4.441	12.6836	-4.117	13.1129	20.285	13.9978	20.814	12.8347	-3.673
11.7643	-4.076	13.0412	-4.071	13.0988	-4.375	13.275	-4.444	12.7153	-4.117	13.1456	20.349	14.0328	19.696	12.8668	-3.637
11.7937	-4.091	13.0737	-4.044	13.1314	-4.415	13.3082	-4.476	12.747	-4.11	13.1784	20.228	14.0678	18.675	12.8988	-3.514
11.823	-4.095	13.1062	-4.116	13.1641	-4.375	13.3413	-4.377	12.7787	-4.096	13.2112	20.123	14.1028	17.612	12.9309	-3.514
11.8523	-4.12	13.1387	-4.043	13.1967	-4.395	13.3744	-4.422	12.8104	-4.112	13.244	19.982	14.1378	16.676	12.963	-3.385
11.8817	-4.131	13.1712	-4.11	13.2294	-4.402	13.4075	-4.43	12.8422	-4.034	13.2768	19.822	14.1728	15.76	12.9951	-3.291
11.911	-4.119	13.2038	-4.069	13.2621	-4.396	13.4406	-4.422	12.8739	-4.08	13.3096	19.614	14.2078	14.876	13.0272	-3.18
11.9403	-4.071	13.2363	-4.08	13.2947	-4.374	13.4737	-4.394	12.9056	-4.06	13.3423	19.367	14.2427	13.956	13.0593	-3.026
11.9697	-4.11	13.2688	-4.092	13.3274	-4.333	13.5068	-4.375	12.9373	-4.07	13.3751	19.159	14.2777	13.159	13.0914	-2.978
11.999	-4.089	13.3013	-4.092	13.3601	-4.356	13.5399	-4.385	12.969	-3.986	13.4079	18.915	14.3127	12.318	13.1234	-2.852
12.0284	-4.035	13.3338	-4.082	13.3927	-4.361	13.573	-4.35	13.0007	-4.001	13.4407	18.709	14.3477	11.533	13.1555	-2.726
12.0577	-4.105	13.3664	-4.104	13.4254	-4.349	13.6061	-4.335	13.0324	-3.98	13.4735	18.388	14.3827	10.757	13.1876	-2.627
12.087	-4.06	13.3989	-4.077	13.4581	-4.422	13.6392	-4.343	13.0641	-3.923	13.5063	18.109	14.4177	10.05	13.2197	-2.452
12.1164	-4.107	13.4314	-4.088	13.4907	-4.373	13.6723	-4.361	13.0958	-3.921	13.539	17.885	14.4527	9.368	13.2518	-2.318
12.1457	-4.089	13.4639	-4.078	13.5234	-4.353	13.7054	-4.329	13.1275	-3.898	13.5718	17.691	14.4877	8.73	13.2839	-2.123
12.175	-4.117	13.4965	-4.109	13.5561	-4.36	13.7385	-4.324	13.1592	-3.91	13.6046	17.607	14.5227	8.088	13.316	-1.947
12.2044	-4.088	13.529	-4.096	13.5887	-4.396	13.7716	-4.269	13.191	-3.881	13.6374	17.484	14.5577	7.51	13.3481	-1.766
12.2337	-4.103	13.5615	-4.102	13.6214	-4.369	13.8047	-4.28	13.2227	-3.861	13.6702	17.499	14.5927	6.914	13.3801	-1.579
12.2631	-4.091	13.594	-4.076	13.6541	-4.398	13.8378	-4.237	13.2544	-3.825	13.7029	17.568	14.6277	6.353	13.4122	-1.313
12.2924	-4.088	13.6265	-4.041	13.6867	-4.364	13.8709	-4.286	13.2861	-3.802	13.7357	17.742	14.6627	5.899	13.4443	-1.098
12.3217	-4.07	13.6591	-4.096	13.7194	-4.345	13.904	-4.221	13.3178	-3.801	13.7685	17.989	14.6977	5.428	13.4764	-0.82
12.3511	-4.087	13.6916	-4.082	13.7521	-4.362	13.9371	-4.226	13.3495	-3.767	13.8013	18.444	14.7327	4.992	13.5085	-0.536
12.3804	-4.106	13.7241	-4.066	13.7847	-4.327	13.9702	-4.177	13.3812	-3.75	13.8341	18.955	14.7677	4.642	13.5406	-0.284
12.4097	-4.122	13.7566	-4.06	13.8174	-4.345	14.0034	-4.154	13.4129	-3.784	13.8669	19.676	14.8027	4.219	13.5727	0.081
12.4391	-4.108	13.7891	-4.103	13.8501	-4.391	14.0365	-4.142	13.4446	-3.74	13.8996	20.594	14.8377	3.843	13.6047	0.383
12.4684	-4.126	13.8217	-4.109	13.8827	-4.383	14.0696	-4.155	13.4763	-3.708	13.9324	21.7	14.8726	3.529	13.6368	0.701
12.4978	-4.081	13.8542	-4.106	13.9154	-4.384	14.1027	-4.102	13.508	-3.696	13.9652	23.033	14.9076	3.173	13.6689	1.069
12.5271	-4.056	13.8867	-4.036	13.948	-4.383	14.1358	-4.008	13.5398	-3.659	13.998	24.636	14.9426	2.816	13.701	1.463
12.5564	-4.102	13.9192	-4.091	13.9807	-4.332	14.1689	-4.027	13.5715	-3.625	14.0308	26.499	14.9776	2.556	13.7331	1.812
12.5858	-4.072	13.9518	-4.114	14.0134	-4.344	14.202	-3.984	13.6032	-3.645	14.0635	28.485	15.0126	2.305	13.7652	2.21
12.6151	-4.09	13.9843	-4.095	14.046	-4.308	14.2351	-3.966	13.6349	-3.59	14.0963	30.718	15.0476	2.058	13.7973	2.572
12.6444	-4.105	14.0168	-4.072	14.0787	-4.309	14.2682	-3.906	13.6666	-3.576	14.1291	33.257	15.0826	1.86	13.8294	2.992
12.6738	-4.096	14.0493	-4.045	14.1114	-4.294	14.3013	-3.898	13.6983	-3.568	14.1619	36.002	15.1176	1.584	13.8614	3.408
12.7031	-4.14	14.0818	-4.115	14.144	-4.297	14.3344	-3.854	13.73	-3.5	14.1947	38.925	15.1526	1.443	13.8935	3.74
12.7325	-4.125	14.1144	-4.122	14.1767	-4.337	14.3675	-3.81	13.7617	-3.538	14.2275	42.145	15.1876	1.275	13.9256	4.163
12.7618	-4.126	14.1469	-4.102	14.2094	-4.327	14.4006	-3.743	13.7934	-3.531	14.2602	45.477	15.2226	1.098	13.9577	4.525
12.7911	-4.072	14.1794	-4.113	14.242	-4.315	14.4337	-3.732	13.8251	-3.47	14.293	48.986	15.2576	0.958	13.9898	4.921
12.8205	-4.108	14.2119	-4.104	14.2747	-4.254	14.4668	-3.722	13.8568	-3.425	14.3258	52.59	15.2926	0.854	14.0219	5.323
12.8498	-4.102	14.2444	-4.063	14.3074	-4.286	14.4999	-3.692	13.8886	-3.401	14.3586	56.245	15.3276	0.715	14.054	5.704
12.8791	-4.1	14.277	-4.063	14.34	-4.341	14.533	-3.57	13.9203	-3.402	14.3914	60.005	15.3626	0.601	14.086	6.015
12.9085	-4.149	14.3095	-4.088	14.3727	-4.327	14.5661	-3.517	13.952	-3.319	14.4242	63.839	15.3976	0.535	14.1181	6.371
12.9378	-4.11	14.342	-4.119	14.4054	-4.343	14.5992	-3.468	13.9837	-3.334	14.4569	67.632	15.4326	0.448	14.1502	6.746
12.9672	-4.1	14.3745	-4.11	14.438	-4.321	14.6323	-3.431	14.0154	-3.271	14.4897	71.276	15.4676	0.33	14.1823	7.054
12.9965	-4.09	14.4071	-4.093	14.4707	-4.332	14.6654	-3.345	14.0471	-3.204	14.5225	74.805	15.5025	0.301	14.2144	7.363
13.0258	-4.121	14.4396	-4.088	14.5034	-4.309	14.6986	-3.244	14.0788	-3.178	14.5553	78.134	15.5375	0.261	14.2465	7.673
13.0552	-4.101	14.4721	-4.079	14.536	-4.315	14.7317	-3.173	14.1105	-3.191	14.5881	81.407	15.5725	0.212	14.2786	7.932
13.0845	-4.134	14.5046	-4.101	14.5687	-4.29	14.7648	-3.067	14.1422	-3.091	14.6208	84.362	15.6075	0.197	14.3107	8.287
13.1138	-4.088	14.5371	-4.078	14.6014	-4.332	14.7979	-3.002	14.1739	-3.056	14.6536	87.089	15.6425	0.118	14.3427	8.492
13.1432	-4.166	14.5697	-4.041	14.634	-4.266	14.831	-2.953	14.2056	-3.038	14.6864	89.432	15.6775	0.116	14.3748	8.74
13.1725	-4.082	14.6022	-4.117	14.6667	-4.275	14.8641	-2.795	14.2373	-2.987	14.7192	91.432	15.7125	0.122	14.4069	8.989
13.2019	-4.125	14.6347	-4.071	14.6993	-4.273	14.8972	-2.732	14.2691	-2.892	14.752	93.218	15.7475	0.063	14.439	9.241
13.2312	-4.102	14.6672	-4.094	14.732	-4.298	14.9303	-2.61	14.3008	-2.833	14.7848	94.62	15.7825	0.064	14.4711	9.424
13.2605	-4.092	14.6998	-4.087	14.7647	-4.254	14.9634	-2.459	14.3325	-2.735	14.8175	95.666	15.8175	0.051	14.5032	9.73
13.2899	-4.095	14.7323	-4.14	14.7973	-4.234	14.9965	-2.369	14.3642	-2.662	14.8503	96.301	15.8525	0.068	14.5353	9.92
13.3192	-4.082	14.7648	-4.083	14.83	-4.245	15.0296	-2.265	14.3959	-2.599	14.8831	96.573	15.8875	0.067	14.5673	10.112
13.3485	-4.075	14.7973	-4.111	14.8627	-4.227	15.0627	-2.152	14.4276	-2.504	14.9159	96.552	15.9225	0.067	14.5994	10.401
13.3779	-4.08	14.8298	-4.111	14.8953	-4.214	15.0958	-1.986	14.4593	-2.437	14.9487	96.295	15.9575	0.093	14.6315	10.577
13.4072	-4.12	14.8624	-4.094	14.928	-4.219	15.1289	-1.808	14.491	-2.294	14.9814	95.535	15.9925	0.079	14.6636	10.948
13.4365	-4.093	14.8949	-4.125	14.9607	-4.175	15.162	-1.675	14.5227	-2.225	15.0142	94.596	16.0275	0.07	14.6957	11.215
13.4659	-4.095	14.9274	-4.09	14.9933	-4.198	15.1951	-1.576	14.5544	-2.109	15.047	93.308	16.0625	0.107	14.7278	11.618
13.4952	-4.071	14.9599	-4.076	15.026	-4.193	15.2282	-1.36	14.5861	-1.963	15.0798	91.794	16.0975	0.083	14.7599	12.103
13.5246	-4.073	14.9924	-4.065	15.0587	-4.187	15.2613	-1.17	14.6179	-1.914	15.1126	90.066	16.1324	0.076	14.792	12.579
13.5539	-4.102	15.025	-4.139	15.0913	-4.158	15.2944	-0.991	14.6496	-1.72	15.1454	88.018	16.1674	0.069	14.824	13.309
13.5832	-4.124	15.0575	-4.045	15.124	-4.129	15.3275	-0.798	14.6813	-1.597	15.1781	85.74	16.2024	0.036	14.8561	14.086
13.6126	-4.136	15.09	-4.109	15.1567	-4.137	15.3607	-0.557	14.713	-1.502	15.2109	83.364	16.2374	0.051	14.8882	14.946
13.6419	-4.082	15.1225	-4.065	15.1893	-4.126	15.3938	-0.344	14.7447	-1.335	15.2437	80.828	16.2724	0.047	14.9203	16.026
13.6712	-4.097	15.1551	-4.096	15.222	-4.109	15.4269	-0.101	14.7764	-1.155	15.2765	78.14	16.3074	0.013	14.9524	17.317
13.7006	-4.112	15.1876	-4.085	15.2547	-4.113	15.46	0.185	14.8081	-1.078	15.3093	75.372	16.3424	-0.028	14.9845	18.904
13.7299	-4.121	15.2201	-4.088	15.2873	-4.08	15.4931	0.462	14.8398	-0.939	15.3421	72.58	16.3774	0.041	15.0166	20.539
13.7593	-4.094	15.2526	-4.071	15.32	-4.078	15.5262	0.746	14.8715	-0.747	15.3748	69.648	16.4124	-0.031	15.0486	22.543
13.7886	-4.153	15.2851	-4.1	15.3527	-4.038	15.5593	1.067	14.9032	-0.56	15.4076	66.694	16.4474	-0.078	15.0807	24.746
13.8179	-4.14	15.3177	-4.055	15.3853	-4.028	15.5924	1.425	14.9349	-0.432	15.4404	63.613	16.4824	-0.089	15.1128	27.299
13.8473	-4.118	15.3502	-4.043	15.418	-3.964	15.6255	1.729	14.9667	-0.22	15.4732	60.696	16.5174	-0.119	15.1449	30.092
13.8766	-4.114	15.3827	-4.06	15.4507	-3.978	15.6586	2.106	14.9984	-0.04	15.506	57.736	16.5524	-0.141	15.177	33.148
13.9059	-4.137	15.4152	-4.108	15.4833	-3.918	15.6917	2.44	15.0301	0.101	15.5387	54.789	16.5874	-0.18	15.2091	36.498
13.9353	-4.142	15.4477	-4.05	15.516	-3.882	15.7248	2.854	15.0618	0.305	15.5715	52.027	16.6224	-0.256	15.2412	40.033
13.9646	-4.069	15.4803	-4.106	15.5486	-3.868	15.7579	3.221	15.0935	0.451	15.6043	49.144	16.6574	-0.237	15.2733	43.781
13.994	-4.152	15.5128	-4.081	15.5813	-3.802	15.791	3.682	15.1252	0.667	15.6371	46.284	16.6924	-0.298	15.3053	47.83
14.0233	-4.106	15.5453	-4.034	15.614	-3.754	15.8241	4.083	15.1569	0.855	15.6699	43.446	16.7274	-0.359	15.3374	52.004
14.0526	-4.126	15.5778	-4.01	15.6466	-3.741	15.8572	4.504	15.1886	1.058	15.7027	40.934	16.7623	-0.42	15.3695	56.348
14.082	-4.071	15.6104	-4.04	15.6793	-3.716	15.8903	4.902	15.2203	1.282	15.7354	38.403	16.7973	-0.422	15.4016	60.762
14.1113	-4.104	15.6429	-4.046	15.712	-3.603	15.9234	5.34	15.252	1.502	15.7682	35.985	16.8323	-0.503	15.4337	65.228
14.1406	-4.101	15.6754	-4.063	15.7446	-3.631	15.9565	5.751	15.2837	1.664	15.801	33.611	16.8673	-0.525	15.4658	69.707
14.17	-4.085	15.7079	-4.014	15.7773	-3.619	15.9896	6.139	15.3155	1.912	15.8338	31.432	16.9023	-0.559	15.4979	74.128
14.1993	-4.083	15.7404	-4.018	15.81	-3.518	16.0227	6.497	15.3472	2.127	15.8666	29.307	16.9373	-0.645	15.5299	78.621
14.2287	-4.131	15.773	-4.026	15.8426	-3.491	16.0559	6.879	15.3789	2.416	15.8993	27.351	16.9723	-0.664	15.562	82.761
14.258	-4.075	15.8055	-4.037	15.8753	-3.453	16.089	7.225	15.4106	2.642	15.9321	25.368	17.0073	-0.71	15.5941	86.711
14.2873	-4.097	15.838	-4.021	15.908	-3.379	16.1221	7.67	15.4423	2.889	15.9649	23.542	17.0423	-0.764	15.6262	90.471
14.3167	-4.101	15.8705	-3.984	15.9406	-3.314	16.1552	7.897	15.474	3.143	15.9977	21.823	17.0773	-0.787	15.6583	93.987
14.346	-4.085	15.903	-3.99	15.9733	-3.191	16.1883	8.267	15.5057	3.441	16.0305	20.118	17.1123	-0.836	15.6904	97.145
14.3753	-4.086	15.9356	-3.985	16.006	-3.187	16.2214	8.568	15.5374	3.745	16.0633	18.644	17.1473	-0.908	15.7225	99.909
14.4047	-4.142	15.9681	-4.033	16.0386	-3.109	16.2545	8.77	15.5691	4.063	16.096	17.135	17.1823	-0.896	15.7546	102.3
14.434	-4.141	16.0006	-3.971	16.0713	-3.015	16.2876	9.05	15.6008	4.457	16.1288	15.808	17.2173	-0.982	15.7866	104.262
14.4634	-4.106	16.0331	-3.954	16.104	-2.911	16.3207	9.284	15.6325	4.97	16.1616	14.567	17.2523	-1.009	15.8187	105.907
14.4927	-4.067	16.0657	-3.945	16.1366	-2.856	16.3538	9.529	15.6643	5.509	16.1944	13.362	17.2873	-1.089	15.8508	107.157
14.522	-4.109	16.0982	-3.957	16.1693	-2.737	16.3869	9.805	15.696	6.114	16.2272	12.205	17.3223	-1.115	15.8829	108.001
14.5514	-4.096	16.1307	-3.894	16.202	-2.719	16.42	10.05	15.7277	6.86	16.26	11.205	17.3573	-1.117	15.915	108.447
14.5807	-4.081	16.1632	-3.956	16.2346	-2.544	16.4531	10.328	15.7594	7.763	16.2927	10.201	17.3922	-1.211	15.9471	108.557
14.61	-4.106	16.1957	-3.874	16.2673	-2.455	16.4862	10.758	15.7911	8.703	16.3255	9.255	17.4272	-1.207	15.9792	108.313
14.6394	-4.075	16.2283	-3.85	16.2999	-2.281	16.5193	11.086	15.8228	9.969	16.3583	8.405	17.4622	-1.27	16.0112	107.677
14.6687	-4.099	16.2608	-3.872	16.3326	-2.243	16.5524	11.548	15.8545	11.264	16.3911	7.643	17.4972	-1.313	16.0433	106.787
14.6981	-4.11	16.2933	-3.85	16.3653	-2.082	16.5855	12.161	15.8862	12.921	16.4239	6.874	17.5322	-1.274	16.0754	105.613
14.7274	-4.115	16.3258	-3.815	16.3979	-1.929	16.6186	12.867	15.9179	14.82	16.4566	6.179	17.5672	-1.371	16.1075	104.13
14.7567	-4.067	16.3584	-3.775	16.4306	-1.799	16.6517	13.759	15.9496	16.886	16.4894	5.514	17.6022	-1.385	16.1396	102.45
14.7861	-4.132	16.3909	-3.76	16.4633	-1.673	16.6848	14.746	15.9813	19.445	16.5222	4.855	17.6372	-1.463	16.1717	100.464
14.8154	-4.088	16.4234	-3.774	16.4959	-1.516	16.7179	15.96	16.0131	22.26	16.555	4.298	17.6722	-1.423	16.2038	98.318
14.8447	-4.146	16.4559	-3.735	16.5286	-1.283	16.7511	17.458	16.0448	25.391	16.5878	3.785	17.7072	-1.436	16.2359	95.847
14.8741	-4.088	16.4884	-3.708	16.5613	-1.181	16.7842	19.064	16.0765	28.828	16.6206	3.267	17.7422	-1.468	16.2679	93.434
14.9034	-4.101	16.521	-3.709	16.5939	-1.001	16.8173	20.915	16.1082	32.568	16.6533	2.87	17.7772	-1.537	16.3	90.778
14.9328	-4.093	16.5535	-3.697	16.6266	-0.758	16.8504	23.15	16.1399	36.691	16.6861	2.429	17.8122	-1.533	16.3321	87.968
14.9621	-4.087	16.586	-3.635	16.6593	-0.548	16.8835	25.456	16.1716	41.066	16.7189	2.023	17.8472	-1.591	16.3642	85.153
14.9914	-4.064	16.6185	-3.555	16.6919	-0.375	16.9166	28.188	16.2033	45.875	16.7517	1.706	17.8822	-1.625	16.3963	82.238
15.0208	-4.121	16.651	-3.611	16.7246	-0.136	16.9497	30.995	16.235	50.842	16.7845	1.382	17.9172	-1.637	16.4284	79.206
15.0501	-4.055	16.6836	-3.545	16.7573	0.053	16.9828	34.143	16.2667	56.11	16.8172	1.079	17.9522	-1.656	16.4605	76.178
15.0794	-4.113	16.7161	-3.463	16.7899	0.349	17.0159	37.418	16.2984	61.53	16.85	0.789	17.9872	-1.716	16.4925	73.087
15.1088	-4.077	16.7486	-3.471	16.8226	0.513	17.049	40.905	16.3301	67.177	16.8828	0.443	18.0221	-1.779	16.5246	69.905
15.1381	-4.055	16.7811	-3.422	16.8553	0.816	17.0821	44.553	16.3619	72.947	16.9156	0.242	18.0571	-1.845	16.5567	66.731
15.1675	-4.088	16.8137	-3.403	16.8879	1.083	17.1152	48.327	16.3936	78.649	16.9484	0.01	18.0921	-1.806	16.5888	63.683
15.1968	-4.105	16.8462	-3.338	16.9206	1.349	17.1483	51.984	16.4253	84.376	16.9812	-0.21	18.1271	-1.882	16.6209	60.624
15.2261	-4.135	16.8787	-3.305	16.9533	1.654	17.1814	55.733	16.457	90.07	17.0139	-0.403	18.1621	-1.897	16.653	57.578
15.2555	-4.109	16.9112	-3.244	16.9859	1.945	17.2145	59.494	16.4887	95.579	17.0467	-0.591	18.1971	-1.929	16.6851	54.555
15.2848	-4.123	16.9437	-3.265	17.0186	2.283	17.2476	63.123	16.5204	100.799	17.0795	-0.773	18.2321	-2.013	16.7172	51.647
15.3141	-4.125	16.9763	-3.175	17.0512	2.624	17.2807	66.623	16.5521	105.814	17.1123	-0.961	18.2671	-2.023	16.7492	48.83
15.3435	-4.086	17.0088	-3.102	17.0839	2.891	17.3138	69.84	16.5838	110.458	17.1451	-1.129	18.3021	-2.04	16.7813	45.995
15.3728	-4.122	17.0413	-3.094	17.1166	3.324	17.3469	72.937	16.6155	114.725	17.1779	-1.241	18.3371	-2.07	16.8134	43.319
15.4022	-4.092	17.0738	-3.066	17.1492	3.696	17.38	75.788	16.6472	118.485	17.2106	-1.387	18.3721	-2.078	16.8455	40.73
15.4315	-4.072	17.1063	-3.022	17.1819	4.092	17.4132	78.261	16.6789	121.791	17.2434	-1.469	18.4071	-2.111	16.8776	38.25
15.4608	-4.101	17.1389	-2.916	17.2146	4.514	17.4463	80.466	16.7107	124.502	17.2762	-1.596	18.4421	-2.194	16.9097	35.946
15.4902	-4.125	17.1714	-2.925	17.2472	4.968	17.4794	82.376	16.7424	126.723	17.309	-1.712	18.4771	-2.243	16.9418	33.657
15.5195	-4.105	17.2039	-2.885	17.2799	5.437	17.5125	83.863	16.7741	128.417	17.3418	-1.857	18.5121	-2.308	16.9738	31.443
15.5488	-4.085	17.2364	-2.792	17.3126	5.819	17.5456	85.095	16.8058	129.355	17.3745	-1.88	18.5471	-2.322	17.0059	29.345
15.5782	-4.107	17.269	-2.746	17.3452	6.322	17.5787	85.944	16.8375	129.749	17.4073	-1.979	18.5821	-2.372	17.038	27.32
15.6075	-4.119	17.3015	-2.718	17.3779	6.804	17.6118	86.455	16.8692	129.592	17.4401	-2.043	18.6171	-2.372	17.0701	25.379
15.6369	-4.103	17.334	-2.604	17.4106	7.245	17.6449	86.68	16.9009	128.846	17.4729	-2.128	18.652	-2.403	17.1022	23.555
15.6662	-4.099	17.3665	-2.561	17.4432	7.822	17.678	86.55	16.9326	127.52	17.5057	-2.219	18.687	-2.425	17.1343	21.886
15.6955	-4.122	17.399	-2.457	17.4759	8.265	17.7111	86.075	16.9643	125.788	17.5385	-2.262	18.722	-2.483	17.1664	20.34
15.7249	-4.111	17.4316	-2.444	17.5086	8.744	17.7442	85.354	16.996	123.633	17.5712	-2.345	18.757	-2.499	17.1985	18.75
15.7542	-4.098	17.4641	-2.351	17.5412	9.237	17.7773	84.375	17.0277	121.014	17.604	-2.399	18.792	-2.549	17.2305	17.378
15.7835	-4.059	17.4966	-2.299	17.5739	9.67	17.8104	83.046	17.0595	118.075	17.6368	-2.433	18.827	-2.614	17.2626	15.943
15.8129	-4.065	17.5291	-2.231	17.6066	10.126	17.8435	81.538	17.0912	114.762	17.6696	-2.493	18.862	-2.604	17.2947	14.659
15.8422	-4.065	17.5616	-2.143	17.6392	10.544	17.8766	79.81	17.1229	111.201	17.7024	-2.551	18.897	-2.646	17.3268	13.486
15.8716	-4.101	17.5942	-2.056	17.6719	10.922	17.9097	77.849	17.1546	107.399	17.7351	-2.536	18.932	-2.695	17.3589	12.377
15.9009	-4.137	17.6267	-1.971	17.7046	11.349	17.9428	75.739	17.1863	103.503	17.7679	-2.581	18.967	-2.725	17.391	11.218
15.9302	-4.089	17.6592	-1.858	17.7372	11.723	17.9759	73.406	17.218	99.4	17.8007	-2.635	19.002	-2.789	17.4231	10.273
15.9596	-4.08	17.6917	-1.815	17.7699	12.023	18.009	71.029	17.2497	95.254	17.8335	-2.675	19.037	-2.816	17.4551	9.431
15.9889	-4.088	17.7243	-1.71	17.8025	12.335	18.0421	68.516	17.2814	91.018	17.8663	-2.707	19.072	-2.826	17.4872	8.591
16.0182	-4.012	17.7568	-1.586	17.8352	12.593	18.0752	65.986	17.3131	86.793	17.8991	-2.699	19.107	-2.834	17.5193	7.781
16.0476	-4.097	17.7893	-1.514	17.8679	12.893	18.1084	63.252	17.3448	82.619	17.9318	-2.718	19.142	-2.884	17.5514	7.062
16.0769	-4.09	17.8218	-1.4	17.9005	13.194	18.1415	60.719	17.3765	78.426	17.9646	-2.831	19.177	-2.921	17.5835	6.384
16.1063	-4.079	17.8543	-1.302	17.9332	13.473	18.1746	57.787	17.4083	74.324	17.9974	-2.799	19.212	-2.937	17.6156	5.714
16.1356	-4.076	17.8869	-1.22	17.9659	13.806	18.2077	55.053	17.44	70.202	18.0302	-2.821	19.247	-3.008	17.6477	5.052
16.1649	-4.057	17.9194	-1.111	17.9985	14.192	18.2408	52.244	17.4717	66.251	18.063	-2.879	19.2819	-3.039	17.6798	4.585
16.1943	-4.047	17.9519	-1.008	18.0312	14.58	18.2739	49.539	17.5034	62.497	18.0958	-2.857	19.3169	-3.072	17.7118	4.052
16.2236	-4.032	17.9844	-0.917	18.0639	15.085	18.307	46.78	17.5351	58.901	18.1285	-2.841	19.3519	-3.092	17.7439	3.611
16.2529	-4.043	18.017	-0.828	18.0965	15.713	18.3401	44.219	17.5668	55.306	18.1613	-2.905	19.3869	-3.12	17.776	3.147
16.2823	-4.059	18.0495	-0.707	18.1292	16.427	18.3732	41.527	17.5985	51.926	18.1941	-2.895	19.4219	-3.15	17.8081	2.691
16.3116	-4.052	18.082	-0.591	18.1619	17.265	18.4063	39.002	17.6302	48.553	18.2269	-2.911	19.4569	-3.158	17.8402	2.341
16.341	-4.078	18.1145	-0.45	18.1945	18.384	18.4394	36.53	17.6619	45.492	18.2597	-2.907	19.4919	-3.192	17.8723	2.022
16.3703	-4.052	18.147	-0.338	18.2272	19.567	18.4725	34.139	17.6936	42.539	18.2924	-2.957	19.5269	-3.282	17.9044	1.694
16.3996	-4.07	18.1796	-0.268	18.2599	21.068	18.5056	31.77	17.7253	39.719	18.3252	-2.944	19.5619	-3.251	17.9364	1.407
16.429	-4.057	18.2121	-0.149	18.2925	22.636	18.5387	29.601	17.7571	37.146	18.358	-2.924	19.5969	-3.267	17.9685	1.175
16.4583	-4.042	18.2446	-0.003	18.3252	24.599	18.5718	27.458	17.7888	34.544	18.3908	-3.02	19.6319	-3.326	18.0006	0.93
16.4876	-4.058	18.2771	0.137	18.3579	26.586	18.6049	25.476	17.8205	32.226	18.4236	-3.033	19.6669	-3.382	18.0327	0.665
16.517	-4.061	18.3096	0.268	18.3905	28.82	18.638	23.539	17.8522	29.99	18.4564	-3.002	19.7019	-3.384	18.0648	0.491
16.5463	-4.055	18.3422	0.361	18.4232	31.268	18.6711	21.736	17.8839	27.821	18.4891	-3.004	19.7369	-3.367	18.0969	0.296
16.5757	-4.06	18.3747	0.478	18.4559	33.826	18.7042	20.045	17.9156	25.907	18.5219	-3.043	19.7719	-3.442	18.129	0.086
16.605	-4.03	18.4072	0.646	18.4885	36.57	18.7373	18.394	17.9473	23.996	18.5547	-3.038	19.8069	-3.419	18.1611	-0.046
16.6343	-4.054	18.4397	0.744	18.5212	39.274	18.7705	16.81	17.979	22.227	18.5875	-3.051	19.8419	-3.449	18.1931	-0.201
16.6637	-4.053	18.4723	0.929	18.5538	42.087	18.8036	15.295	18.0107	20.581	18.6203	-3.04	19.8769	-3.483	18.2252	-0.336
16.693	-4.033	18.5048	1.119	18.5865	44.848	18.8367	13.963	18.0424	19.025	18.653	-3.055	19.9118	-3.48	18.2573	-0.493
16.7223	-3.996	18.5373	1.285	18.6192	47.509	18.8698	12.662	18.0741	17.556	18.6858	-3.071	19.9468	-3.54	18.2894	-0.594
16.7517	-4.02	18.5698	1.5	18.6518	50.061	18.9029	11.422	18.1059	16.248	18.7186	-3.088	19.9818	-3.596	18.3215	-0.696
16.781	-3.974	18.6023	1.63	18.6845	52.545	18.936	10.253	18.1376	14.975	18.7514	-3.108	20.0168	-3.535	18.3536	-0.812
16.8104	-4.007	18.6349	1.827	18.7172	54.775	18.9691	9.18	18.1693	13.755	18.7842	-3.111	20.0518	-3.59	18.3857	-0.903
16.8397	-4.016	18.6674	2.022	18.7498	56.855	19.0022	8.169	18.201	12.679	18.817	-3.138	20.0868	-3.596	18.4177	-0.99
16.869	-3.987	18.6999	2.192	18.7825	58.724	19.0353	7.286	18.2327	11.546	18.8497	-3.115	20.1218	-3.633	18.4498	-1.06
16.8984	-3.991	18.7324	2.42	18.8152	60.26	19.0684	6.367	18.2644	10.588	18.8825	-3.092	20.1568	-3.683	18.4819	-1.147
16.9277	-4.009	18.7649	2.629	18.8478	61.619	19.1015	5.563	18.2961	9.667	18.9153	-3.11	20.1918	-3.659	18.514	-1.25
16.957	-3.942	18.7975	2.871	18.8805	62.658	19.1346	4.814	18.3278	8.799	18.9481	-3.107	20.2268	-3.686	18.5461	-1.328
16.9864	-3.929	18.83	3.117	18.9132	63.354	19.1677	4.11	18.3595	7.948	18.9809	-3.13	20.2618	-3.724	18.5782	-1.371
17.0157	-3.974	18.8625	3.408	18.9458	63.857	19.2008	3.434	18.3912	7.253	19.0137	-3.096	20.2968	-3.741	18.6103	-1.417
17.0451	-3.93	18.895	3.707	18.9785	64.017	19.2339	2.837	18.4229	6.525	19.0464	-3.107	20.3318	-3.711	18.6424	-1.496
17.0744	-3.968	18.9276	4.067	19.0112	63.994	19.267	2.283	18.4546	5.812	19.0792	-3.14	20.3668	-3.754	18.6744	-1.541
17.1037	-3.976	18.9601	4.409	19.0438	63.713	19.3001	1.803	18.4864	5.293	19.112	-3.091	20.4018	-3.721	18.7065	-1.633
17.1331	-3.948	18.9926	4.856	19.0765	63.16	19.3332	1.28	18.5181	4.594	19.1448	-3.076	20.4368	-3.748	18.7386	-1.673
17.1624	-3.965	19.0251	5.309	19.1092	62.347	19.3663	0.902	18.5498	4.134	19.1776	-3.074	20.4718	-3.776	18.7707	-1.703
17.1917	-3.954	19.0576	5.942	19.1418	61.412	19.3994	0.403	18.5815	3.639	19.2103	-3.066	20.5068	-3.727	18.8028	-1.807
17.2211	-3.967	19.0902	6.59	19.1745	60.213	19.4325	0.06	18.6132	3.154	19.2431	-3.044	20.5417	-3.832	18.8349	-1.882
17.2504	-3.929	19.1227	7.348	19.2072	58.884	19.4657	-0.256	18.6449	2.692	19.2759	-3.062	20.5767	-3.81	18.867	-1.904
17.2798	-3.878	19.1552	8.196	19.2398	57.303	19.4988	-0.6	18.6766	2.283	19.3087	-3.014	20.6117	-3.868	18.899	-2.015
17.3091	-3.889	19.1877	9.15	19.2725	55.679	19.5319	-0.92	18.7083	1.951	19.3415	-3.021	20.6467	-3.835	18.9311	-2.03
17.3384	-3.865	19.2202	10.189	19.3051	53.889	19.565	-1.184	18.74	1.546	19.3743	-3.005	20.6817	-3.813	18.9632	-2.116
17.3678	-3.858	19.2528	11.458	19.3378	52.007	19.5981	-1.379	18.7717	1.186	19.407	-3.008	20.7167	-3.831	18.9953	-2.111
17.3971	-3.915	19.2853	12.688	19.3705	49.989	19.6312	-1.631	18.8034	0.907	19.4398	-3.01	20.7517	-3.891	19.0274	-2.189
17.4264	-3.907	19.3178	14.151	19.4031	47.911	19.6643	-1.839	18.8352	0.613	19.4726	-3	20.7867	-3.902	19.0595	-2.251
17.4558	-3.883	19.3503	15.649	19.4358	45.801	19.6974	-2.016	18.8669	0.319	19.5054	-2.985	20.8217	-3.862	19.0916	-2.297
17.4851	-3.829	19.3829	17.322	19.4685	43.641	19.7305	-2.143	18.8986	0.082	19.5382	-2.937	20.8567	-3.911	19.1237	-2.372
17.5145	-3.844	19.4154	18.971	19.5011	41.556	19.7636	-2.35	18.9303	-0.197	19.5709	-2.92	20.8917	-3.888	19.1557	-2.387
17.5438	-3.816	19.4479	20.785	19.5338	39.342	19.7967	-2.505	18.962	-0.401	19.6037	-2.871	20.9267	-3.904	19.1878	-2.437
17.5731	-3.811	19.4804	22.767	19.5665	37.298	19.8298	-2.667	18.9937	-0.611	19.6365	-2.866	20.9617	-3.93	19.2199	-2.469
17.6025	-3.808	19.5129	24.629	19.5991	35.115	19.8629	-2.737	19.0254	-0.772	19.6693	-2.867	20.9967	-3.943	19.252	-2.529
17.6318	-3.797	19.5455	26.67	19.6318	33.067	19.896	-2.831	19.0571	-1.044	19.7021	-2.82	21.0317	-3.939	19.2841	-2.598
17.6611	-3.787	19.578	28.586	19.6645	31.046	19.9291	-2.982	19.0888	-1.147	19.7349	-2.787	21.0667	-3.938	19.3162	-2.585
17.6905	-3.787	19.6105	30.596	19.6971	29.048	19.9622	-3.042	19.1205	-1.363	19.7676	-2.732	21.1017	-3.978	19.3483	-2.644
17.7198	-3.761	19.643	32.505	19.7298	27.035	19.9953	-3.148	19.1522	-1.484	19.8004	-2.736	21.1367	-4.037	19.3803	-2.727
17.7492	-3.789	19.6756	34.284	19.7625	25.178	20.0284	-3.208	19.184	-1.653	19.8332	-2.673	21.1716	-4.003	19.4124	-2.759
17.7785	-3.717	19.7081	36.023	19.7951	23.329	20.0615	-3.245	19.2157	-1.784	19.866	-2.665	21.2066	-3.958	19.4445	-2.796
17.8078	-3.744	19.7406	37.63	19.8278	21.582	20.0946	-3.355	19.2474	-1.888	19.8988	-2.618	21.2416	-3.997	19.4766	-2.787
17.8372	-3.694	19.7731	39.09	19.8605	19.9	20.1277	-3.382	19.2791	-2.084	19.9316	-2.652	21.2766	-4.059	19.5087	-2.861
17.8665	-3.696	19.8056	40.406	19.8931	18.25	20.1609	-3.5	19.3108	-2.121	19.9643	-2.524	21.3116	-3.99	19.5408	-2.881
17.8958	-3.645	19.8382	41.621	19.9258	16.739	20.194	-3.525	19.3425	-2.231	19.9971	-2.536	21.3466	-4.035	19.5729	-2.948
17.9252	-3.667	19.8707	42.692	19.9585	15.243	20.2271	-3.549	19.3742	-2.345	20.0299	-2.562	21.3816	-4.017	19.605	-2.931
17.9545	-3.666	19.9032	43.568	19.9911	13.871	20.2602	-3.619	19.4059	-2.464	20.0627	-2.479	21.4166	-4.062	19.637	-2.96
17.9839	-3.626	19.9357	44.246	20.0238	12.572	20.2933	-3.618	19.4376	-2.519	20.0955	-2.449	21.4516	-4.024	19.6691	-3.022
18.0132	-3.583	19.9682	44.736	20.0564	11.369	20.3264	-3.676	19.4693	-2.57	20.1282	-2.371	21.4866	-4.045	19.7012	-2.987
18.0425	-3.557	20.0008	45.107	20.0891	10.209	20.3595	-3.738	19.501	-2.641	20.161	-2.373	21.5216	-4.054	19.7333	-3.05
18.0719	-3.598	20.0333	45.301	20.1218	9.235	20.3926	-3.742	19.5328	-2.732	20.1938	-2.302	21.5566	-4.079	19.7654	-3.05
18.1012	-3.522	20.0658	45.275	20.1544	8.158	20.4257	-3.769	19.5645	-2.828	20.2266	-2.269	21.5916	-4.063	19.7975	-3.054
18.1305	-3.443	20.0983	45.155	20.1871	7.276	20.4588	-3.789	19.5962	-2.899	20.2594	-2.246	21.6266	-4.105	19.8296	-3.108
18.1599	-3.497	20.1309	44.836	20.2198	6.369	20.4919	-3.793	19.6279	-2.969	20.2922	-2.267	21.6616	-4.06	19.8616	-3.089
18.1892	-3.475	20.1634	44.39	20.2524	5.56	20.525	-3.855	19.6596	-3.002	20.3249	-2.192	21.6966	-4.068	19.8937	-3.126
18.2186	-3.408	20.1959	43.812	20.2851	4.826	20.5581	-3.864	19.6913	-3.037	20.3577	-2.216	21.7316	-4.125	19.9258	-3.104
18.2479	-3.403	20.2284	43.035	20.3178	4.136	20.5912	-3.907	19.723	-3.101	20.3905	-2.119	21.7666	-4.09	19.9579	-3.101
18.2772	-3.349	20.2609	42.32	20.3504	3.551	20.6243	-3.89	19.7547	-3.103	20.4233	-2.116	21.8015	-4.122	19.99	-3.184
18.3066	-3.295	20.2935	41.345	20.3831	2.874	20.6574	-3.94	19.7864	-3.154	20.4561	-2.13	21.8365	-4.092	20.0221	-3.123
18.3359	-3.338	20.326	40.403	20.4158	2.332	20.6905	-3.889	19.8181	-3.183	20.4889	-2.094	21.8715	-4.11	20.0542	-3.1
18.3652	-3.265	20.3585	39.309	20.4484	1.849	20.7236	-3.955	19.8498	-3.24	20.5216	-2.059	21.9065	-4.109	20.0863	-3.12
18.3946	-3.212	20.391	38.14	20.4811	1.365	20.7567	-3.955	19.8816	-3.231	20.5544	-2.019	21.9415	-4.144	20.1183	-3.184
18.4239	-3.191	20.4235	36.885	20.5138	0.981	20.7898	-3.999	19.9133	-3.266	20.5872	-2	21.9765	-4.093	20.1504	-3.137
18.4533	-3.162	20.4561	35.629	20.5464	0.583	20.823	-4	19.945	-3.344	20.62	-1.988	22.0115	-4.128	20.1825	-3.146
18.4826	-3.156	20.4886	34.235	20.5791	0.187	20.8561	-4.04	19.9767	-3.333	20.6528	-1.966	22.0465	-4.162	20.2146	-3.14
18.5119	-3.089	20.5211	32.931	20.6118	-0.111	20.8892	-4.032	20.0084	-3.395	20.6855	-1.845	22.0815	-4.147	20.2467	-3.137
18.5413	-2.998	20.5536	31.583	20.6444	-0.415	20.9223	-4.038	20.0401	-3.379	20.7183	-1.919	22.1165	-4.103	20.2788	-3.17
18.5706	-2.991	20.5862	30.141	20.6771	-0.661	20.9554	-3.991	20.0718	-3.369	20.7511	-1.911	22.1515	-4.132	20.3109	-3.16
18.5999	-2.917	20.6187	28.771	20.7098	-0.889	20.9885	-4.057	20.1035	-3.406	20.7839	-1.907	22.1865	-4.128	20.3429	-3.14
18.6293	-2.884	20.6512	27.492	20.7424	-1.147	21.0216	-4.071	20.1352	-3.362	20.8167	-1.893	22.2215	-4.139	20.375	-3.193
18.6586	-2.858	20.6837	26.115	20.7751	-1.356	21.0547	-4.075	20.1669	-3.425	20.8495	-1.914	22.2565	-4.165	20.4071	-3.159
18.688	-2.873	20.7162	24.635	20.8077	-1.588	21.0878	-4.058	20.1986	-3.458	20.8822	-1.891	22.2915	-4.18	20.4392	-3.142
18.7173	-2.775	20.7488	23.29	20.8404	-1.716	21.1209	-4.086	20.2304	-3.498	20.915	-1.903	22.3265	-4.149	20.4713	-3.178
18.7466	-2.723	20.7813	21.933	20.8731	-1.846	21.154	-4.113	20.2621	-3.484	20.9478	-1.911	22.3615	-4.139	20.5034	-3.145
18.776	-2.674	20.8138	20.653	20.9057	-2.021	21.1871	-4.091	20.2938	-3.494	20.9806	-1.906	22.3965	-4.191	20.5355	-3.155
18.8053	-2.642	20.8463	19.354	20.9384	-2.167	21.2202	-4.081	20.3255	-3.449	21.0134	-1.945	22.4314	-4.16	20.5676	-3.178
18.8346	-2.606	20.8788	18.146	20.9711	-2.238	21.2533	-4.156	20.3572	-3.539	21.0461	-1.931	22.4664	-4.2	20.5996	-3.182
18.864	-2.528	20.9114	16.893	21.0037	-2.395	21.2864	-4.128	20.3889	-3.562	21.0789	-1.911	22.5014	-4.153	20.6317	-3.229
18.8933	-2.506	20.9439	15.693	21.0364	-2.481	21.3195	-4.181	20.4206	-3.501	21.1117	-1.944	22.5364	-4.186	20.6638	-3.259
18.9227	-2.401	20.9764	14.585	21.0691	-2.588	21.3526	-4.177	20.4523	-3.509	21.1445	-1.941	22.5714	-4.172	20.6959	-3.228
18.952	-2.392	21.0089	13.476	21.1017	-2.752	21.3857	-4.17	20.484	-3.524	21.1773	-2.032	22.6064	-4.181	20.728	-3.238
18.9813	-2.371	21.0415	12.477	21.1344	-2.745	21.4188	-4.164	20.5157	-3.502	21.2101	-2.015	22.6414	-4.181	20.7601	-3.266
19.0107	-2.3	21.074	11.487	21.1671	-2.845	21.4519	-4.184	20.5474	-3.51	21.2428	-2.069	22.6764	-4.196	20.7922	-3.283
19.04	-2.248	21.1065	10.513	21.1997	-2.89	21.485	-4.175	20.5792	-3.537	21.2756	-2.04	22.7114	-4.188	20.8242	-3.323
19.0693	-2.196	21.139	9.693	21.2324	-2.978	21.5182	-4.229	20.6109	-3.556	21.3084	-2.077	22.7464	-4.168	20.8563	-3.302
19.0987	-2.131	21.1715	8.809	21.2651	-3.037	21.5513	-4.214	20.6426	-3.52	21.3412	-2.048	22.7814	-4.194	20.8884	-3.284
19.128	-2.088	21.2041	7.977	21.2977	-3.08	21.5844	-4.25	20.6743	-3.561	21.374	-2.093	22.8164	-4.18	20.9205	-3.295
19.1574	-2.119	21.2366	7.211	21.3304	-3.155	21.6175	-4.202	20.706	-3.567	21.4068	-2.111	22.8514	-4.184	20.9526	-3.288
19.1867	-2.043	21.2691	6.44	21.3631	-3.16	21.6506	-4.256	20.7377	-3.585	21.4395	-2.169	22.8864	-4.229	20.9847	-3.332
19.216	-1.991	21.3016	5.765	21.3957	-3.254	21.6837	-4.24	20.7694	-3.583	21.4723	-2.164	22.9214	-4.188	21.0168	-3.335
19.2454	-1.937	21.3342	5.113	21.4284	-3.276	21.7168	-4.23	20.8011	-3.584	21.5051	-2.234	22.9564	-4.214	21.0489	-3.357
19.2747	-1.875	21.3667	4.511	21.4611	-3.414	21.7499	-4.228	20.8328	-3.589	21.5379	-2.259	22.9914	-4.173	21.0809	-3.388
19.304	-1.809	21.3992	3.978	21.4937	-3.367	21.783	-4.192	20.8645	-3.626	21.5707	-2.25	23.0264	-4.208	21.113	-3.428
19.3334	-1.817	21.4317	3.468	21.5264	-3.383	21.8161	-4.22	20.8962	-3.598	21.6034	-2.331	23.0613	-4.205	21.1451	-3.388
19.3627	-1.724	21.4642	2.963	21.559	-3.42	21.8492	-4.265	20.928	-3.642	21.6362	-2.354	23.0963	-4.252	21.1772	-3.409
19.3921	-1.688	21.4968	2.528	21.5917	-3.427	21.8823	-4.264	20.9597	-3.628	21.669	-2.368	23.1313	-4.283	21.2093	-3.474
19.4214	-1.613	21.5293	2.088	21.6244	-3.479	21.9154	-4.242	20.9914	-3.668	21.7018	-2.402	23.1663	-4.157	21.2414	-3.426
19.4507	-1.549	21.5618	1.696	21.657	-3.545	21.9485	-4.216	21.0231	-3.613	21.7346	-2.386	23.2013	-4.232	21.2735	-3.424
19.4801	-1.516	21.5943	1.297	21.6897	-3.58	21.9816	-4.273	21.0548	-3.676	21.7674	-2.375	23.2363	-4.257	21.3055	-3.428
19.5094	-1.491	21.6268	0.989	21.7224	-3.596	22.0147	-4.217	21.0865	-3.679	21.8001	-2.457	23.2713	-4.254	21.3376	-3.499
19.5387	-1.401	21.6594	0.664	21.755	-3.634	22.0478	-4.219	21.1182	-3.697	21.8329	-2.406	23.3063	-4.209	21.3697	-3.514
19.5681	-1.369	21.6919	0.374	21.7877	-3.646	22.0809	-4.211	21.1499	-3.75	21.8657	-2.44	23.3413	-4.25	21.4018	-3.516
19.5974	-1.324	21.7244	0.101	21.8204	-3.662	22.114	-4.206	21.1816	-3.695	21.8985	-2.416	23.3763	-4.243	21.4339	-3.512
19.6268	-1.237	21.7569	-0.164	21.853	-3.718	22.1471	-4.238	21.2133	-3.764	21.9313	-2.347	23.4113	-4.205	21.466	-3.572
19.6561	-1.163	21.7895	-0.4	21.8857	-3.719	22.1803	-3.97	21.245	-3.814	21.964	-2.334	23.4463	-4.237	21.4981	-3.592
19.6854	-1.107	21.822	-0.603	21.9184	-3.761	22.2134	-4.061	21.2768	-3.83	21.9968	-2.342	23.4813	-4.2	21.5302	-3.681
19.7148	-1.037	21.8545	-0.77	21.951	-3.791	22.2465	-4.15	21.3085	-3.841	22.0296	-2.275	23.5163	-4.222	21.5622	-3.612
19.7441	-1.016	21.887	-0.999	21.9837	-3.849	22.2796	-4.198	21.3402	-3.864	22.0624	-2.246	23.5513	-4.251	21.5943	-3.646
19.7734	-0.934	21.9195	-1.19	22.0164	-3.84	22.3127	-4.204	21.3719	-3.857	22.0952	-2.126	23.5863	-4.262	21.6264	-3.69
19.8028	-0.807	21.9521	-1.312	22.049	-3.83	22.3458	-4.207	21.4036	-3.895	22.128	-2.083	23.6213	-4.23	21.6585	-3.671
19.8321	-0.812	21.9846	-1.435	22.0817	-3.806	22.3789	-4.216	21.4353	-3.946	22.1607	-2.034	23.6563	-4.26	21.6906	-3.692
19.8615	-0.679	22.0171	-1.552	22.1144	-3.889	22.412	-4.243	21.467	-3.96	22.1935	-1.94	23.6913	-4.249	21.7227	-3.748
19.8908	-0.617	22.0496	-1.648	22.147	-3.827	22.4451	-4.265	21.4987	-3.976	22.2263	-1.855	23.7262	-4.266	21.7548	-3.728
19.9201	-0.581	22.0821	-1.794	22.1797	-3.891	22.4782	-4.233	21.5304	-4.026	22.2591	-1.74	23.7612	-4.223	21.7868	-3.753
19.9495	-0.472	22.1147	-1.871	22.2124	-3.888	22.5113	-4.315	21.5621	-4.022	22.2919	-1.628	23.7962	-4.272	21.8189	-3.783
19.9788	-0.367	22.1472	-1.954	22.245	-3.891	22.5444	-4.265	21.5938	-4.056	22.3247	-1.545	23.8312	-4.259	21.851	-3.784
20.0081	-0.314	22.1797	-2.109	22.2777	-3.953	22.5775	-4.247	21.6256	-4.072	22.3574	-1.463	23.8662	-4.218	21.8831	-3.796
20.0375	-0.23	22.2122	-2.114	22.3103	-3.958	22.6106	-4.248	21.6573	-4.073	22.3902	-1.355	23.9012	-4.295	21.9152	-3.877
20.0668	-0.129	22.2448	-2.145	22.343	-3.934	22.6437	-4.263	21.689	-4.155	22.423	-1.218	23.9362	-4.253	21.9473	-3.831
20.0961	-0.049	22.2773	-2.273	22.3757	-3.973	22.6768	-4.254	21.7207	-4.106	22.4558	-1.115	23.9712	-4.301	21.9794	-3.893
20.1255	0.097	22.3098	-2.333	22.4083	-3.961	22.7099	-4.285	21.7524	-4.114	22.4886	-1.006	24.0062	-4.27	22.0115	-3.846
20.1548	0.164	22.3423	-2.369	22.441	-3.976	22.743	-4.307	21.7841	-4.101	22.5213	-0.867	24.0412	-4.257	22.0435	-3.87
20.1842	0.276	22.3748	-2.398	22.4737	-3.928	22.7761	-4.273	21.8158	-4.174	22.5541	-0.842	24.0762	-4.26	22.0756	-3.943
20.2135	0.39	22.4074	-2.427	22.5063	-3.938	22.8092	-4.309	21.8475	-4.156	22.5869	-0.741	24.1112	-4.295	22.1077	-3.904
20.2428	0.498	22.4399	-2.47	22.539	-3.969	22.8423	-4.288	21.8792	-4.218	22.6197	-0.707	24.1462	-4.311	22.1398	-3.912
20.2722	0.627	22.4724	-2.473	22.5717	-3.978	22.8755	-4.282	21.9109	-4.189	22.6525	-0.611	24.1812	-4.263	22.1719	-3.932
20.3015	0.719	22.5049	-2.519	22.6043	-4.022	22.9086	-4.283	21.9426	-4.233	22.6853	-0.552	24.2162	-4.215	22.204	-3.924
20.3308	0.837	22.5375	-2.617	22.637	-3.97	22.9417	-4.351	21.9744	-4.235	22.718	-0.477	24.2512	-4.243	22.2361	-3.99
20.3602	0.912	22.57	-2.576	22.6697	-4.008	22.9748	-4.291	22.0061	-4.195	22.7508	-0.464	24.2862	-4.239	22.2681	-3.977
20.3895	1.11	22.6025	-2.635	22.7023	-4.004	23.0079	-4.303	22.0378	-4.185	22.7836	-0.433	24.3212	-4.271	22.3002	-3.969
20.4189	1.219	22.635	-2.615	22.735	-4.012	23.041	-4.286	22.0695	-4.159	22.8164	-0.405	24.3561	-4.274	22.3323	-3.978
20.4482	1.363	22.6675	-2.655	22.7677	-4.046	23.0741	-4.346	22.1012	-4.208	22.8492	-0.423	24.3911	-4.246	22.3644	-3.967
20.4775	1.457	22.7001	-2.676	22.8003	-3.999	23.1072	-4.315	22.1329	-4.227	22.8819	-0.396	24.4261	-4.269	22.3965	-3.97
20.5069	1.651	22.7326	-2.696	22.833	-4.02	23.1403	-4.349	22.1646	-4.189	22.9147	-0.397	24.4611	-4.272	22.4286	-3.965
20.5362	1.812	22.7651	-2.707	22.8657	-4.034	23.1734	-4.316	22.1963	-4.21	22.9475	-0.424	24.4961	-4.236	22.4607	-3.985
20.5655	1.889	22.7976	-2.755	22.8983	-4.036	23.2065	-4.357	22.228	-4.236	22.9803	-0.463	24.5311	-4.222	22.4928	-3.999
20.5949	2.064	22.8301	-2.768	22.931	-4.12	23.2396	-4.365	22.2597	-4.2	23.0131	-0.577	24.5661	-4.266	22.5248	-4.006
20.6242	2.244	22.8627	-2.799	22.9637	-4.084	23.2727	-4.343	22.2914	-4.21	23.0459	-0.611	24.6011	-4.298	22.5569	-3.953
20.6536	2.346	22.8952	-2.823	22.9963	-4.103	23.3058	-4.346	22.3231	-4.209	23.0786	-0.69	24.6361	-4.294	22.589	-4.02
20.6829	2.468	22.9277	-2.869	23.029	-4.074	23.3389	-4.335	22.3549	-4.22	23.1114	-0.761	24.6711	-4.289	22.6211	-4.007
20.7122	2.601	22.9602	-2.866	23.0616	-4.074	23.372	-4.347	22.3866	-4.191	23.1442	-0.836	24.7061	-4.272	22.6532	-4.002
20.7416	2.771	22.9928	-2.827	23.0943	-4.121	23.4051	-4.342	22.4183	-4.163	23.177	-0.915	24.7411	-4.211	22.6853	-4.007
20.7709	2.937	23.0253	-2.891	23.127	-4.123	23.4382	-4.346	22.45	-4.18	23.2098	-1.06	24.7761	-4.267	22.7174	-4.024
20.8002	3.057	23.0578	-2.884	23.1596	-4.083	23.4713	-4.361	22.4817	-4.215	23.2426	-1.144	24.8111	-4.255	22.7494	-3.955
20.8296	3.282	23.0903	-2.943	23.1923	-4.053	23.5044	-4.378	22.5134	-4.185	23.2753	-1.224	24.8461	-4.268	22.7815	-3.978
20.8589	3.394	23.1228	-2.948	23.225	-4.121	23.5375	-4.335	22.5451	-4.18	23.3081	-1.354	24.8811	-4.255	22.8136	-4
20.8883	3.598	23.1554	-2.984	23.2576	-4.144	23.5707	-4.361	22.5768	-4.215	23.3409	-1.532	24.9161	-4.257	22.8457	-3.994
20.9176	3.753	23.1879	-2.971	23.2903	-4.165	23.6038	-4.396	22.6085	-4.167	23.3737	-1.606	24.9511	-4.288	22.8778	-3.983
20.9469	3.968	23.2204	-3.042	23.323	-4.129	23.6369	-4.342	22.6402	-4.192	23.4065	-1.658	24.986	-4.288	22.9099	-3.94
20.9763	4.228	23.2529	-3.02	23.3556	-4.14	23.67	-4.402	22.6719	-4.199	23.4392	-1.82	25.021	-4.243	22.942	-3.992
21.0056	4.399	23.2854	-3.078	23.3883	-4.12	23.7031	-4.36	22.7037	-4.185	23.472	-1.934	25.056	-4.261	22.9741	-4.035
21.0349	4.746	23.318	-3.068	23.421	-4.192	23.7362	-4.367	22.7354	-4.164	23.5048	-2.066	25.091	-4.252	23.0061	-4.01
21.0643	5.129	23.3505	-3.091	23.4536	-4.182	23.7693	-4.332	22.7671	-4.168	23.5376	-2.156	25.126	-4.267	23.0382	-4.004
21.0936	5.477	23.383	-3.079	23.4863	-4.17	23.8024	-4.412	22.7988	-4.134	23.5704	-2.292	25.161	-4.288	23.0703	-4.031
21.123	5.964	23.4155	-3.125	23.519	-4.133	23.8355	-4.357	22.8305	-4.14	23.6032	-2.435	25.196	-4.264	23.1024	-4.065
21.1523	6.514	23.4481	-3.16	23.5516	-4.169	23.8686	-4.363	22.8622	-4.169	23.6359	-2.483	25.231	-4.297	23.1345	-4.023
21.1816	7.044	23.4806	-3.185	23.5843	-4.186	23.9017	-4.329	22.8939	-4.178	23.6687	-2.631	25.266	-4.249	23.1666	-4.05
21.211	7.675	23.5131	-3.221	23.617	-4.186	23.9348	-4.401	22.9256	-4.168	23.7015	-2.689	25.301	-4.234	23.1987	-4.041
21.2403	8.322	23.5456	-3.242	23.6496	-4.212	23.9679	-4.367	22.9573	-4.123	23.7343	-2.752	25.336	-4.305	23.2307	-4.084
21.2696	9.082	23.5781	-3.218	23.6823	-4.175	24.001	-4.404	22.989	-4.193	23.7671	-2.888	25.371	-4.323	23.2628	-4.06
21.299	9.806	23.6107	-3.283	23.715	-4.193	24.0341	-4.394	23.0207	-4.156	23.7998	-2.923	25.406	-4.265	23.2949	-4.084
21.3283	10.555	23.6432	-3.252	23.7476	-4.182	24.0672	-4.349	23.0525	-4.148	23.8326	-3.039	25.441	-4.319	23.327	-4.091
21.3577	11.283	23.6757	-3.241	23.7803	-4.194	24.1003	-4.41	23.0842	-4.146	23.8654	-3.161	25.476	-4.288	23.3591	-4.128
21.387	12.085	23.7082	-3.301	23.8129	-4.211	24.1334	-4.395	23.1159	-4.164	23.8982	-3.176	25.511	-4.306	23.3912	-4.095
21.4163	12.866	23.7407	-3.33	23.8456	-4.182	24.1665	-4.383	23.1476	-4.171	23.931	-3.24	25.546	-4.331	23.4233	-4.116
21.4457	13.575	23.7733	-3.365	23.8783	-4.187	24.1996	-4.383	23.1793	-4.135	23.9638	-3.353	25.581	-4.308	23.4554	-4.133
21.475	14.353	23.8058	-3.387	23.9109	-4.217	24.2328	-4.447	23.211	-4.192	23.9965	-3.387	25.6159	-4.292	23.4874	-4.109
21.5043	15.042	23.8383	-3.406	23.9436	-4.257	24.2659	-4.376	23.2427	-4.184	24.0293	-3.444	25.6509	-4.333	23.5195	-4.116
21.5337	15.741	23.8708	-3.387	23.9763	-4.264	24.299	-4.362	23.2744	-4.186	24.0621	-3.453	25.6859	-4.301	23.5516	-4.112
21.563	16.366	23.9034	-3.381	24.0089	-4.251	24.3321	-4.356	23.3061	-4.244	24.0949	-3.521	25.7209	-4.297	23.5837	-4.123
21.5924	17.004	23.9359	-3.392	24.0416	-4.282	24.3652	-4.384	23.3378	-4.168	24.1277	-3.578	25.7559	-4.263	23.6158	-4.177
21.6217	17.59	23.9684	-3.409	24.0743	-4.211	24.3983	-4.382	23.3695	-4.214	24.1605	-3.571	25.7909	-4.308	23.6479	-4.178
21.651	18.123	24.0009	-3.463	24.1069	-4.193	24.4314	-4.408	23.4013	-4.277	24.1932	-3.635	25.8259	-4.308	23.68	-4.193
21.6804	18.613	24.0334	-3.451	24.1396	-4.199	24.4645	-4.448	23.433	-4.28	24.226	-3.686	25.8609	-4.313	23.712	-4.222
21.7097	19.074	24.066	-3.49	24.1723	-4.22	24.4976	-4.415	23.4647	-4.22	24.2588	-3.677	25.8959	-4.261	23.7441	-4.225
21.739	19.364	24.0985	-3.505	24.2049	-4.189	24.5307	-4.398	23.4964	-4.273	24.2916	-3.777	25.9309	-4.318	23.7762	-4.203
21.7684	19.703	24.131	-3.551	24.2376	-4.245	24.5638	-4.404	23.5281	-4.24	24.3244	-3.746	25.9659	-4.309	23.8083	-4.243
21.7977	19.922	24.1635	-3.55	24.2703	-4.248	24.5969	-4.398	23.5598	-4.289	24.3571	-3.73	26.0009	-4.261	23.8404	-4.259
21.8271	20.168	24.1961	-3.522	24.3029	-4.278	24.63	-4.419	23.5915	-4.299	24.3899	-3.817	26.0359	-4.296	23.8725	-4.27
21.8564	20.376	24.2286	-3.551	24.3356	-4.279	24.6631	-4.428	23.6232	-4.26	24.4227	-3.82	26.0709	-4.301	23.9046	-4.219
21.8857	20.485	24.2611	-3.541	24.3683	-4.268	24.6962	-4.393	23.6549	-4.274	24.4555	-3.836	26.1059	-4.311	23.9367	-4.217
21.9151	20.572	24.2936	-3.589	24.4009	-4.336	24.7293	-4.377	23.6866	-4.273	24.4883	-3.824	26.1409	-4.334	23.9687	-4.299
21.9444	20.621	24.3261	-3.575	24.4336	-4.281	24.7624	-4.394	23.7183	-4.301	24.5211	-3.866	26.1759	-4.323	24.0008	-4.31
21.9737	20.669	24.3587	-3.622	24.4663	-4.318	24.7955	-4.379	23.7501	-4.301	24.5538	-3.879	26.2109	-4.333	24.0329	-4.311
22.0031	20.645	24.3912	-3.593	24.4989	-4.297	24.8286	-4.386	23.7818	-4.303	24.5866	-3.871	26.2458	-4.319	24.065	-4.292
22.0324	20.612	24.4237	-3.636	24.5316	-4.346	24.8617	-4.398	23.8135	-4.27	24.6194	-3.889	26.2808	-4.32	24.0971	-4.316
22.0618	20.489	24.4562	-3.617	24.5642	-4.297	24.8948	-4.387	23.8452	-4.323	24.6522	-3.901	26.3158	-4.273	24.1292	-4.328
22.0911	20.349	24.4887	-3.642	24.5969	-4.32	24.928	-4.396	23.8769	-4.297	24.685	-3.885	26.3508	-4.309	24.1613	-4.318
22.1204	20.217	24.5213	-3.648	24.6296	-4.344	24.9611	-4.333	23.9086	-4.274	24.7177	-3.887	26.3858	-4.337	24.1933	-4.298
22.1498	20.008	24.5538	-3.674	24.6622	-4.358	24.9942	-4.404	23.9403	-4.304	24.7505	-3.887	26.4208	-4.344	24.2254	-4.324
22.1791	19.782	24.5863	-3.673	24.6949	-4.313	25.0273	-4.374	23.972	-4.33	24.7833	-3.919	26.4558	-4.359	24.2575	-4.32
22.2084	19.589	24.6188	-3.632	24.7276	-4.344	25.0604	-4.364	24.0037	-4.336	24.8161	-3.9	26.4908	-4.285	24.2896	-4.291
22.2378	19.293	24.6514	-3.68	24.7602	-4.318	25.0935	-4.454	24.0354	-4.341	24.8489	-3.898	26.5258	-4.336	24.3217	-4.296
22.2671	19.025	24.6839	-3.663	24.7929	-4.322	25.1266	-4.394	24.0671	-4.307	24.8817	-3.916	26.5608	-4.347	24.3538	-4.313
22.2965	18.725	24.7164	-3.675	24.8256	-4.303	25.1597	-4.415	24.0989	-4.368	24.9144	-3.94	26.5958	-4.38	24.3859	-4.38
22.3258	18.413	24.7489	-3.721	24.8582	-4.334	25.1928	-4.394	24.1306	-4.303	24.9472	-3.912	26.6308	-4.306	24.418	-4.302
22.3551	18.063	24.7814	-3.685	24.8909	-4.333	25.2259	-4.376	24.1623	-4.317	24.98	-3.917	26.6658	-4.304	24.45	-4.366
22.3845	17.722	24.814	-3.697	24.9236	-4.347	25.259	-4.381	24.194	-4.386	25.0128	-3.878	26.7008	-4.36	24.4821	-4.354
22.4138	17.319	24.8465	-3.721	24.9562	-4.332	25.2921	-4.399	24.2257	-4.36	25.0456	-3.941	26.7358	-4.336	24.5142	-4.36
22.4431	16.963	24.879	-3.764	24.9889	-4.329	25.3252	-4.428	24.2574	-4.372	25.0784	-3.938	26.7708	-4.329	24.5463	-4.317
22.4725	16.567	24.9115	-3.73	25.0216	-4.317	25.3583	-4.422	24.2891	-4.379	25.1111	-3.902	26.8058	-4.278	24.5784	-4.402
22.5018	16.195	24.944	-3.755	25.0542	-4.33	25.3914	-4.411	24.3208	-4.386	25.1439	-3.941	26.8408	-4.322	24.6105	-4.344
22.5312	15.77	24.9766	-3.766	25.0869	-4.326	25.4245	-4.401	24.3525	-4.384	25.1767	-3.93	26.8757	-4.318	24.6426	-4.37
22.5605	15.417	25.0091	-3.724	25.1196	-4.34	25.4576	-4.425	24.3842	-4.338	25.2095	-3.979	26.9107	-4.336	24.6746	-4.323
22.5898	14.962	25.0416	-3.789	25.1522	-4.318	25.4907	-4.355	24.4159	-4.369	25.2423	-3.892	26.9457	-4.367	24.7067	-4.39
22.6192	14.529	25.0741	-3.772	25.1849	-4.31	25.5238	-4.433	24.4477	-4.37	25.275	-3.897	26.9807	-4.339	24.7388	-4.311
22.6485	14.151	25.1067	-3.778	25.2176	-4.353	25.5569	-4.439	24.4794	-4.375	25.3078	-3.892	27.0157	-4.333	24.7709	-4.388
22.6778	13.84	25.1392	-3.772	25.2502	-4.312	25.5901	-4.367	24.5111	-4.363	25.3406	-3.895	27.0507	-4.334	24.803	-4.346
22.7072	13.364	25.1717	-3.799	25.2829	-4.341	25.6232	-4.379	24.5428	-4.35	25.3734	-3.899	27.0857	-4.376	24.8351	-4.349
22.7365	12.978	25.2042	-3.802	25.3155	-4.348	25.6563	-4.371	24.5745	-4.377	25.4062	-3.879	27.1207	-4.286	24.8672	-4.366
22.7659	12.586	25.2367	-3.765	25.3482	-4.331	25.6894	-4.462	24.6062	-4.345	25.439	-3.882	27.1557	-4.293	24.8993	-4.396
22.7952	12.196	25.2693	-3.789	25.3809	-4.332	25.7225	-4.405	24.6379	-4.373	25.4717	-3.849	27.1907	-4.354	24.9313	-4.363
22.8245	11.823	25.3018	-3.83	25.4135	-4.339	25.7556	-4.366	24.6696	-4.397	25.5045	-3.87	27.2257	-4.351	24.9634	-4.395
22.8539	11.481	25.3343	-3.784	25.4462	-4.369	25.7887	-4.386	24.7013	-4.369	25.5373	-3.868	27.2607	-4.379	24.9955	-4.357
22.8832	11.13	25.3668	-3.845	25.4789	-4.354	25.8218	-4.471	24.733	-4.399	25.5701	-3.806	27.2957	-4.322	25.0276	-4.351
22.9125	10.77	25.3993	-3.798	25.5115	-4.399	25.8549	-4.407	24.7647	-4.381	25.6029	-3.811	27.3307	-4.343	25.0597	-4.384
22.9419	10.402	25.4319	-3.807	25.5442	-4.298	25.888	-4.375	24.7965	-4.396	25.6356	-3.828	27.3657	-4.36	25.0918	-4.365
22.9712	10.05	25.4644	-3.823	25.5769	-4.367	25.9211	-4.4	24.8282	-4.372	25.6684	-3.79	27.4007	-4.332	25.1239	-4.397
23.0006	9.719	25.4969	-3.835	25.6095	-4.359	25.9542	-4.361	24.8599	-4.388	25.7012	-3.741	27.4357	-4.32	25.1559	-4.388
23.0299	9.394	25.5294	-3.844	25.6422	-4.379	25.9873	-4.395	24.8916	-4.426	25.734	-3.723	27.4707	-4.316	25.188	-4.375
23.0592	9.037	25.562	-3.86	25.6749	-4.366	26.0204	-4.377	24.9233	-4.388	25.7668	-3.728	27.5056	-4.314	25.2201	-4.382
23.0886	8.691	25.5945	-3.782	25.7075	-4.382	26.0535	-4.44	24.955	-4.373	25.7996	-3.644	27.5406	-4.334	25.2522	-4.356
23.1179	8.471	25.627	-3.859	25.7402	-4.368	26.0866	-4.39	24.9867	-4.369	25.8323	-3.695	27.5756	-4.333	25.2843	-4.407
23.1472	8.132	25.6595	-3.867	25.7729	-4.395	26.1197	-4.391	25.0184	-4.352	25.8651	-3.662	27.6106	-4.376	25.3164	-4.362
23.1766	7.835	25.692	-3.867	25.8055	-4.39	26.1528	-4.392	25.0501	-4.398	25.8979	-3.644	27.6456	-4.317	25.3485	-4.376
23.2059	7.606	25.7246	-3.847	25.8382	-4.379	26.1859	-4.387	25.0818	-4.388	25.9307	-3.574	27.6806	-4.355	25.3806	-4.38
23.2353	7.32	25.7571	-3.899	25.8709	-4.365	26.219	-4.396	25.1135	-4.361	25.9635	-3.582	27.7156	-4.347	25.4126	-4.378
23.2646	7.048	25.7896	-3.884	25.9035	-4.37	26.2521	-4.416	25.1453	-4.362	25.9963	-3.535	27.7506	-4.323	25.4447	-4.357
23.2939	6.797	25.8221	-3.906	25.9362	-4.38	26.2853	-4.324	25.177	-4.404	26.029	-3.534	27.7856	-4.302	25.4768	-4.344
23.3233	6.56	25.8547	-3.902	25.9689	-4.369	26.3184	-4.422	25.2087	-4.387	26.0618	-3.501	27.8206	-4.331	25.5089	-4.38
23.3526	6.331	25.8872	-3.873	26.0015	-4.401	26.3515	-4.387	25.2404	-4.351	26.0946	-3.464	27.8556	-4.33	25.541	-4.328
23.3819	6.064	25.9197	-3.935	26.0342	-4.399	26.3846	-4.418	25.2721	-4.432	26.1274	-3.491	27.8906	-4.39	25.5731	-4.334
23.4113	5.885	25.9522	-3.912	26.0668	-4.414	26.4177	-4.372	25.3038	-4.421	26.1602	-3.41	27.9256	-4.327	25.6052	-4.386
23.4406	5.636	25.9847	-3.926	26.0995	-4.387	26.4508	-4.375	25.3355	-4.429	26.1929	-3.379	27.9606	-4.395	25.6372	-4.349
23.47	5.422	26.0173	-3.896	26.1322	-4.351	26.4839	-4.414	25.3672	-4.423	26.2257	-3.413	27.9956	-4.356	25.6693	-4.342
23.4993	5.176	26.0498	-3.914	26.1648	-4.402	26.517	-4.351	25.3989	-4.376	26.2585	-3.365	28.0306	-4.337	25.7014	-4.415
23.5286	4.972	26.0823	-3.873	26.1975	-4.356	26.5501	-4.397	25.4306	-4.419	26.2913	-3.373	28.0656	-4.361	25.7335	-4.368
23.558	4.798	26.1148	-3.95	26.2302	-4.373	26.5832	-4.471	25.4623	-4.404	26.3241	-3.32	28.1006	-4.319	25.7656	-4.314
23.5873	4.606	26.1473	-3.913	26.2628	-4.404	26.6163	-4.405	25.4941	-4.41	26.3569	-3.327	28.1355	-4.377	25.7977	-4.393
23.6166	4.39	26.1799	-3.929	26.2955	-4.387	26.6494	-4.396	25.5258	-4.393	26.3896	-3.255	28.1705	-4.341	25.8298	-4.361
23.646	4.243	26.2124	-3.966	26.3282	-4.355	26.6825	-4.425	25.5575	-4.414	26.4224	-3.288	28.2055	-4.347	25.8619	-4.343
23.6753	4.074	26.2449	-3.907	26.3608	-4.433	26.7156	-4.418	25.5892	-4.428	26.4552	-3.341	28.2405	-4.397	25.8939	-4.33
23.7047	3.882	26.2774	-3.906	26.3935	-4.388	26.7487	-4.404	25.6209	-4.423	26.488	-3.252	28.2755	-4.423	25.926	-4.372
23.734	3.731	26.31	-3.934	26.4262	-4.383	26.7818	-4.393	25.6526	-4.426	26.5208	-3.321	28.3105	-4.365	25.9581	-4.337
23.7633	3.563	26.3425	-3.948	26.4588	-4.387	26.8149	-4.459	25.6843	-4.438	26.5536	-3.277	28.3455	-4.411	25.9902	-4.362
23.7927	3.404	26.375	-4.007	26.4915	-4.37	26.848	-4.387	25.716	-4.385	26.5863	-3.281	28.3805	-4.421	26.0223	-4.36
23.822	3.235	26.4075	-3.973	26.5242	-4.401	26.8811	-4.419	25.7477	-4.384	26.6191	-3.283	28.4155	-4.394	26.0544	-4.352
23.8513	3.11	26.44	-3.972	26.5568	-4.411	26.9142	-4.398	25.7794	-4.406	26.6519	-3.297	28.4505	-4.349	26.0865	-4.307
23.8807	2.963	26.4726	-4.004	26.5895	-4.375	26.9473	-4.407	25.8111	-4.4	26.6847	-3.306	28.4855	-4.357	26.1185	-4.321
23.91	2.736	26.5051	-4.019	26.6222	-4.44	26.9805	-4.419	25.8429	-4.404	26.7175	-3.342	28.5205	-4.381	26.1506	-4.444
23.9394	2.658	26.5376	-3.964	26.6548	-4.423	27.0136	-4.386	25.8746	-4.421	26.7502	-3.287	28.5555	-4.423	26.1827	-4.369
23.9687	2.586	26.5701	-4.009	26.6875	-4.41	27.0467	-4.402	25.9063	-4.391	26.783	-3.284	28.5905	-4.383	26.2148	-4.354
23.998	2.42	26.6026	-3.947	26.7202	-4.44	27.0798	-4.418	25.938	-4.443	26.8158	-3.372	28.6255	-4.394	26.2469	-4.343
24.0274	2.294	26.6352	-3.97	26.7528	-4.424	27.1129	-4.415	25.9697	-4.44	26.8486	-3.438	28.6605	-4.383	26.279	-4.328
24.0567	2.14	26.6677	-3.958	26.7855	-4.415	27.146	-4.4	26.0014	-4.419	26.8814	-3.406	28.6955	-4.352	26.3111	-4.371
24.086	1.997	26.7002	-4.008	26.8181	-4.41	27.1791	-4.386	26.0331	-4.434	26.9142	-3.413	28.7305	-4.391	26.3432	-4.345
24.1154	1.901	26.7327	-3.966	26.8508	-4.426	27.2122	-4.343	26.0648	-4.416	26.9469	-3.426	28.7654	-4.39	26.3752	-4.38
24.1447	1.755	26.7653	-3.982	26.8835	-4.403	27.2453	-4.406	26.0965	-4.422	26.9797	-3.455	28.8004	-4.352	26.4073	-4.354
24.1741	1.621	26.7978	-4.013	26.9161	-4.39	27.2784	-4.399	26.1282	-4.432	27.0125	-3.476	28.8354	-4.381	26.4394	-4.362
24.2034	1.562	26.8303	-4.025	26.9488	-4.423	27.3115	-4.388	26.1599	-4.462	27.0453	-3.464	28.8704	-4.316	26.4715	-4.412
24.2327	1.449	26.8628	-3.975	26.9815	-4.438	27.3446	-4.406	26.1917	-4.431	27.0781	-3.529	28.9054	-4.371	26.5036	-4.35
24.2621	1.333	26.8953	-4.014	27.0141	-4.404	27.3777	-4.429	26.2234	-4.416	27.1108	-3.511	28.9404	-4.353	26.5357	-4.376
24.2914	1.187	26.9279	-4.002	27.0468	-4.394	27.4108	-4.344	26.2551	-4.469	27.1436	-3.568	28.9754	-4.352	26.5678	-4.376
24.3207	1.169	26.9604	-3.995	27.0795	-4.382	27.4439	-4.386	26.2868	-4.429	27.1764	-3.54	29.0104	-4.348	26.5998	-4.373
24.3501	1.036	26.9929	-4.02	27.1121	-4.385	27.477	-4.401	26.3185	-4.451	27.2092	-3.606	29.0454	-4.367	26.6319	-4.357
24.3794	0.92	27.0254	-3.979	27.1448	-4.44	27.5101	-4.396	26.3502	-4.415	27.242	-3.64	29.0804	-4.367	26.664	-4.381
24.4088	0.886	27.0579	-3.99	27.1775	-4.449	27.5432	-4.391	26.3819	-4.475	27.2748	-3.672	29.1154	-4.366	26.6961	-4.344
24.4381	0.764	27.0905	-4.031	27.2101	-4.427	27.5763	-4.41	26.4136	-4.455	27.3075	-3.723	29.1504	-4.333	26.7282	-4.361
24.4674	0.667	27.123	-3.998	27.2428	-4.471	27.6094	-4.4	26.4453	-4.44	27.3403	-3.803	29.1854	-4.377	26.7603	-4.389
24.4968	0.589	27.1555	-3.986	27.2755	-4.43	27.6426	-4.358	26.477	-4.433	27.3731	-3.728	29.2204	-4.381	26.7924	-4.436
24.5261	0.517	27.188	-4.031	27.3081	-4.448	27.6757	-4.389	26.5087	-4.456	27.4059	-3.761	29.2554	-4.327	26.8245	-4.374
24.5554	0.442	27.2206	-3.963	27.3408	-4.417	27.7088	-4.394	26.5404	-4.483	27.4387	-3.782	29.2904	-4.333	26.8565	-4.401
24.5848	0.327	27.2531	-4.039	27.3735	-4.447	27.7419	-4.362	26.5722	-4.438	27.4715	-3.791	29.3254	-4.367	26.8886	-4.375
24.6141	0.239	27.2856	-3.993	27.4061	-4.43	27.775	-4.396	26.6039	-4.468	27.5042	-3.854	29.3604	-4.308	26.9207	-4.399
24.6435	0.186	27.3181	-3.988	27.4388	-4.448	27.8081	-4.368	26.6356	-4.41	27.537	-3.882	29.3953	-4.365	26.9528	-4.331
24.6728	0.067	27.3506	-4.032	27.4715	-4.427	27.8412	-4.384	26.6673	-4.474	27.5698	-3.884	29.4303	-4.332	26.9849	-4.407
24.7021	0.025	27.3832	-4.002	27.5041	-4.478	27.8743	-4.368	26.699	-4.49	27.6026	-3.906	29.4653	-4.362	27.017	-4.41
24.7315	-0.047	27.4157	-4.042	27.5368	-4.437	27.9074	-4.338	26.7307	-4.466	27.6354	-3.917	29.5003	-4.403	27.0491	-4.379
24.7608	-0.126	27.4482	-4.038	27.5694	-4.432	27.9405	-4.326	26.7624	-4.495	27.6681	-3.958	29.5353	-4.395	27.0811	-4.388
24.7901	-0.219	27.4807	-4.021	27.6021	-4.487	27.9736	-4.369	26.7941	-4.446	27.7009	-3.958	29.5703	-4.398	27.1132	-4.362
24.8195	-0.21	27.5133	-4.056	27.6348	-4.453	28.0067	-4.337	26.8258	-4.428	27.7337	-3.943	29.6053	-4.421	27.1453	-4.396
24.8488	-0.319	27.5458	-4.029	27.6674	-4.427	28.0398	-4.341	26.8575	-4.467	27.7665	-3.958	29.6403	-4.346	27.1774	-4.412
24.8782	-0.29	27.5783	-4.056	27.7001	-4.425	28.0729	-4.382	26.8892	-4.51	27.7993	-4.009	29.6753	-4.406	27.2095	-4.357
24.9075	-0.428	27.6108	-4.054	27.7328	-4.41	28.106	-4.337	26.921	-4.461	27.8321	-4.033	29.7103	-4.396	27.2416	-4.415
24.9368	-0.478	27.6433	-4.026	27.7654	-4.446	28.1391	-4.355	26.9527	-4.484	27.8648	-4.024	29.7453	-4.388	27.2737	-4.488
24.9662	-0.564	27.6759	-4.054	27.7981	-4.426	28.1722	-4.422	26.9844	-4.49	27.8976	-4.003	29.7803	-4.363	27.3058	-4.419
24.9955	-0.576	27.7084	-4.043	27.8308	-4.437	28.2053	-4.384	27.0161	-4.468	27.9304	-4.09	29.8153	-4.428	27.3378	-4.447
25.0248	-0.676	27.7409	-4.079	27.8634	-4.435	28.2384	-4.347	27.0478	-4.495	27.9632	-4.043	29.8503	-4.345	27.3699	-4.408
25.0542	-0.685	27.7734	-3.994	27.8961	-4.446	28.2715	-4.314	27.0795	-4.481	27.996	-4.06	29.8853	-4.36	27.402	-4.366
25.0835	-0.728	27.8059	-4.073	27.9288	-4.436	28.3046	-4.366	27.1112	-4.437	28.0287	-4.093	29.9203	-4.404	27.4341	-4.441
25.1129	-0.797	27.8385	-4.061	27.9614	-4.44	28.3378	-4.365	27.1429	-4.485	28.0615	-4.011	29.9553	-4.412	27.4662	-4.421
25.1422	-0.912	27.871	-4.06	27.9941	-4.45	28.3709	-4.382	27.1746	-4.482	28.0943	-4.109	29.9903	-4.346	27.4983	-4.427
25.1715	-0.877	27.9035	-4.036	28.0268	-4.439	28.404	-4.39	27.2063	-4.494	28.1271	-4.1	30.0252	-4.346	27.5304	-4.393
25.2009	-0.961	27.936	-4.074	28.0594	-4.407	28.4371	-4.359	27.238	-4.537	28.1599	-4.142	30.0602	-4.393	27.5624	-4.444
25.2302	-0.975	27.9686	-4.051	28.0921	-4.459	28.4702	-4.395	27.2698	-4.482	28.1927	-4.11	30.0952	-4.386	27.5945	-4.399
25.2595	-1.014	28.0011	-4.035	28.1248	-4.455	28.5033	-4.378	27.3015	-4.509	28.2254	-4.077	30.1302	-4.4	27.6266	-4.406
25.2889	-1.107	28.0336	-4.116	28.1574	-4.455	28.5364	-4.386	27.3332	-4.523	28.2582	-4.123	30.1652	-4.414	27.6587	-4.443
25.3182	-1.132	28.0661	-4.084	28.1901	-4.463	28.5695	-4.403	27.3649	-4.497	28.291	-4.115	30.2002	-4.42	27.6908	-4.423
25.3476	-1.185	28.0986	-4.078	28.2228	-4.387	28.6026	-4.333	27.3966	-4.498	28.3238	-4.103	30.2352	-4.387	27.7229	-4.416
25.3769	-1.207	28.1312	-4.08	28.2554	-4.456	28.6357	-4.373	27.4283	-4.462	28.3566	-4.123	30.2702	-4.399	27.755	-4.421
25.4062	-1.243	28.1637	-4.075	28.2881	-4.403	28.6688	-4.422	27.46	-4.508	28.3894	-4.111	30.3052	-4.371	27.7871	-4.409
25.4356	-1.33	28.1962	-4.04	28.3207	-4.448	28.7019	-4.49	27.4917	-4.5	28.4221	-4.145	30.3402	-4.354	27.8191	-4.504
25.4649	-1.34	28.2287	-4.064	28.3534	-4.397	28.735	-4.43	27.5234	-4.493	28.4549	-4.135	30.3752	-4.384	27.8512	-4.46
25.4942	-1.424	28.2612	-4.108	28.3861	-4.441	28.7681	-4.368	27.5551	-4.467	28.4877	-4.131	30.4102	-4.385	27.8833	-4.431
25.5236	-1.443	28.2938	-4.084	28.4187	-4.389	28.8012	-4.373	27.5868	-4.472	28.5205	-4.106	30.4452	-4.375	27.9154	-4.426
25.5529	-1.444	28.3263	-4.132	28.4514	-4.405	28.8343	-4.425	27.6186	-4.493	28.5533	-4.089	30.4802	-4.384	27.9475	-4.422
25.5823	-1.496	28.3588	-4.088	28.4841	-4.349	28.8674	-4.355	27.6503	-4.468	28.586	-4.154	30.5152	-4.373	27.9796	-4.398
25.6116	-1.509	28.3913	-4.08	28.5167	-4.419	28.9005	-4.33	27.682	-4.527	28.6188	-4.147	30.5502	-4.414	28.0117	-4.41
25.6409	-1.597	28.4239	-4.099	28.5494	-4.425	28.9336	-4.374	27.7137	-4.497	28.6516	-4.124	30.5852	-4.377	28.0437	-4.421
25.6703	-1.585	28.4564	-4.094	28.5821	-4.432	28.9667	-4.401	27.7454	-4.49	28.6844	-4.151	30.6202	-4.391	28.0758	-4.441
25.6996	-1.635	28.4889	-4.103	28.6147	-4.429	28.9998	-4.364	27.7771	-4.482	28.7172	-4.217	30.6551	-4.377	28.1079	-4.426
25.7289	-1.686	28.5214	-4.079	28.6474	-4.397	29.033	-4.355	27.8088	-4.573	28.75	-4.136	30.6901	-4.374	28.14	-4.426
25.7583	-1.707	28.5539	-4.104	28.6801	-4.428	29.0661	-4.451	27.8405	-4.525	28.7827	-4.178	30.7251	-4.398	28.1721	-4.434
25.7876	-1.709	28.5865	-4.091	28.7127	-4.42	29.0992	-4.373	27.8722	-4.502	28.8155	-4.133	30.7601	-4.431	28.2042	-4.457
25.817	-1.785	28.619	-4.168	28.7454	-4.436	29.1323	-4.409	27.9039	-4.536	28.8483	-4.116	30.7951	-4.375	28.2363	-4.444
25.8463	-1.813	28.6515	-4.125	28.7781	-4.42	29.1654	-4.394	27.9356	-4.486	28.8811	-4.173	30.8301	-4.391	28.2684	-4.48
25.8756	-1.832	28.684	-4.11	28.8107	-4.397	29.1985	-4.409	27.9674	-4.514	28.9139	-4.165	30.8651	-4.371	28.3004	-4.432
25.905	-1.852	28.7165	-4.123	28.8434	-4.446	29.2316	-4.4	27.9991	-4.535	28.9466	-4.174	30.9001	-4.37	28.3325	-4.46
25.9343	-1.864	28.7491	-4.141	28.8761	-4.416	29.2647	-4.381	28.0308	-4.532	28.9794	-4.13	30.9351	-4.344	28.3646	-4.429
25.9636	-1.944	28.7816	-4.078	28.9087	-4.43	29.2978	-4.424	28.0625	-4.48	29.0122	-4.113	30.9701	-4.365	28.3967	-4.389
25.993	-1.955	28.8141	-4.181	28.9414	-4.405	29.3309	-4.419	28.0942	-4.483	29.045	-4.156	31.0051	-4.436	28.4288	-4.475
26.0223	-1.962	28.8466	-4.144	28.9741	-4.411	29.364	-4.407	28.1259	-4.482	29.0778	-4.215	31.0401	-4.367	28.4609	-4.466
26.0517	-1.984	28.8792	-4.197	29.0067	-4.42	29.3971	-4.395	28.1576	-4.497	29.1106	-4.161	31.0751	-4.408	28.493	-4.422
26.081	-2.001	28.9117	-4.142	29.0394	-4.409	29.4302	-4.411	28.1893	-4.483	29.1433	-4.145	31.1101	-4.433	28.525	-4.441
26.1103	-2.046	28.9442	-4.183	29.072	-4.4	29.4633	-4.418	28.221	-4.526	29.1761	-4.148	31.1451	-4.356	28.5571	-4.473
26.1397	-2.051	28.9767	-4.169	29.1047	-4.452	29.4964	-4.403	28.2527	-4.489	29.2089	-4.155	31.1801	-4.374	28.5892	-4.389
26.169	-2.096	29.0092	-4.187	29.1374	-4.452	29.5295	-4.394	28.2844	-4.495	29.2417	-4.163	31.2151	-4.423	28.6213	-4.425
26.1983	-2.115	29.0418	-4.142	29.17	-4.436	29.5626	-4.444	28.3162	-4.488	29.2745	-4.142	31.2501	-4.38	28.6534	-4.473
26.2277	-2.144	29.0743	-4.154	29.2027	-4.415	29.5957	-4.379	28.3479	-4.527	29.3073	-4.193	31.285	-4.391	28.6855	-4.454
26.257	-2.163	29.1068	-4.207	29.2354	-4.413	29.6288	-4.378	28.3796	-4.524	29.34	-4.165	31.32	-4.418	28.7176	-4.477
26.2864	-2.196	29.1393	-4.154	29.268	-4.419	29.6619	-4.443	28.4113	-4.507	29.3728	-4.153	31.355	-4.396	28.7497	-4.452
26.3157	-2.216	29.1719	-4.18	29.3007	-4.417	29.6951	-4.404	28.443	-4.483	29.4056	-4.173	31.39	-4.344	28.7817	-4.446
26.345	-2.261	29.2044	-4.162	29.3334	-4.427	29.7282	-4.402	28.4747	-4.538	29.4384	-4.222	31.425	-4.396	28.8138	-4.421
26.3744	-2.273	29.2369	-4.179	29.366	-4.483	29.7613	-4.389	28.5064	-4.5	29.4712	-4.156	31.46	-4.396	28.8459	-4.467
26.4037	-2.312	29.2694	-4.166	29.3987	-4.39	29.7944	-4.46	28.5381	-4.542	29.5039	-4.186	31.495	-4.387	28.878	-4.472
26.433	-2.307	29.3019	-4.199	29.4314	-4.485	29.8275	-4.416	28.5698	-4.503	29.5367	-4.185	31.53	-4.424	28.9101	-4.392
26.4624	-2.279	29.3345	-4.147	29.464	-4.422	29.8606	-4.434	28.6015	-4.508	29.5695	-4.185	31.565	-4.385	28.9422	-4.419
26.4917	-2.368	29.367	-4.191	29.4967	-4.427	29.8937	-4.409	28.6332	-4.59	29.6023	-4.202	31.6	-4.377	28.9743	-4.427
26.5211	-2.411	29.3995	-4.129	29.5294	-4.423	29.9268	-4.426	28.665	-4.549	29.6351	-4.241	31.635	-4.375	29.0063	-4.474
26.5504	-2.374	29.432	-4.252	29.562	-4.414	29.9599	-4.477	28.6967	-4.533	29.6679	-4.184	31.67	-4.436	29.0384	-4.456
26.5797	-2.406	29.4645	-4.187	29.5947	-4.344	29.993	-4.407	28.7284	-4.542	29.7006	-4.204	31.705	-4.393	29.0705	-4.45
26.6091	-2.423	29.4971	-4.193	29.6274	-4.41	30.0261	-4.423	28.7601	-4.507	29.7334	-4.176	31.74	-4.399	29.1026	-4.398
26.6384	-2.398	29.5296	-4.23	29.66	-4.459	30.0592	-4.427	28.7918	-4.531	29.7662	-4.227	31.775	-4.357	29.1347	-4.465
26.6677	-2.501	29.5621	-4.203	29.6927	-4.46	30.0923	-4.412	28.8235	-4.522	29.799	-4.192	31.81	-4.409	29.1668	-4.471
26.6971	-2.447	29.5946	-4.195	29.7254	-4.467	30.1254	-4.419	28.8552	-4.544	29.8318	-4.202	31.845	-4.4	29.1989	-4.458
26.7264	-2.464	29.6272	-4.221	29.758	-4.427			28.8869	-4.52	29.8645	-4.203	31.88	-4.344	29.231	-4.466
26.7557	-2.536	29.6597	-4.167	29.7907	-4.42			28.9186	-4.575	29.8973	-4.185	31.9149	-4.398	29.263	-4.463
26.7851	-2.523	29.6922	-4.197	29.8233	-4.382			28.9503	-4.52	29.9301	-4.157	31.9499	-4.381	29.2951	-4.473
26.8144	-2.565	29.7247	-4.211	29.856	-4.423			28.982	-4.525	29.9629	-4.211	31.9849	-4.397	29.3272	-4.461
26.8438	-2.6	29.7572	-4.247	29.8887	-4.439			29.0138	-4.552	29.9957	-4.191	32.0199	-4.355	29.3593	-4.503
26.8731	-2.56	29.7898	-4.206	29.9213	-4.425			29.0455	-4.538	30.0285	-4.192	32.0549	-4.393	29.3914	-4.498
26.9024	-2.592	29.8223	-4.23	29.954	-4.443			29.0772	-4.497	30.0612	-4.228	32.0899	-4.393	29.4235	-4.469
26.9318	-2.586	29.8548	-4.203	29.9867	-4.441			29.1089	-4.523	30.094	-4.207	32.1249	-4.415	29.4556	-4.445
26.9611	-2.65	29.8873	-4.187	30.0193	-4.414			29.1406	-4.519	30.1268	-4.159	32.1599	-4.357	29.4876	-4.465
26.9904	-2.657	29.9198	-4.253	30.052	-4.415			29.1723	-4.534	30.1596	-4.208	32.1949	-4.391	29.5197	-4.499
27.0198	-2.641	29.9524	-4.188	30.0847	-4.406			29.204	-4.52	30.1924	-4.263	32.2299	-4.389	29.5518	-4.465
27.0491	-2.687	29.9849	-4.206					29.2357	-4.546	30.2252	-4.207	32.2649	-4.394	29.5839	-4.467
27.0785	-2.705	30.0174	-4.209					29.2674	-4.519			32.2999	-4.388	29.616	-4.452
27.1078	-2.69	30.0499	-4.193					29.2991	-4.569			32.3349	-4.44	29.6481	-4.445
27.1371	-2.776	30.0825	-4.274					29.3308	-4.543			32.3699	-4.441	29.6802	-4.478
27.1665	-2.757							29.3626	-4.526			32.4049	-4.406	29.7123	-4.459
27.1958	-2.784							29.3943	-4.536			32.4399	-4.393	29.7443	-4.461
27.2251	-2.77							29.426	-4.529			32.4749	-4.391	29.7764	-4.456
27.2545	-2.801							29.4577	-4.531			32.5099	-4.452	29.8085	-4.444
27.2838	-2.837							29.4894	-4.557			32.5448	-4.399	29.8406	-4.47
27.3132	-2.842							29.5211	-4.519			32.5798	-4.319	29.8727	-4.491
27.3425	-2.821							29.5528	-4.563			32.6148	-4.38	29.9048	-4.452
27.3718	-2.872							29.5845	-4.532			32.6498	-4.377	29.9369	-4.451
27.4012	-2.853							29.6162	-4.558			32.6848	-4.374	29.9689	-4.477
27.4305	-2.879							29.6479	-4.511			32.7198	-4.374	30.001	-4.459
27.4598	-2.917							29.6796	-4.511			32.7548	-4.413	30.0331	-4.493
27.4892	-2.91							29.7114	-4.504			32.7898	-4.38	30.0652	-4.461
27.5185	-2.863							29.7431	-4.513			32.8248	-4.353	30.0973	-4.537
27.5479	-2.996							29.7748	-4.489			32.8598	-4.449	30.1294	-4.531
27.5772	-2.946							29.8065	-4.537			32.8948	-4.414	30.1615	-4.536
27.6065	-2.925							29.8382	-4.547			32.9298	-4.392	30.1936	-4.507
27.6359	-2.916							29.8699	-4.493			32.9648	-4.411	30.2256	-4.506
27.6652	-2.935							29.9016	-4.556			32.9998	-4.42	30.2577	-4.497
27.6945	-2.996							29.9333	-4.491			33.0348	-4.386	30.2898	-4.468
27.7239	-2.994							29.965	-4.518			33.0698	-4.381
27.7532	-3.024							29.9967	-4.497			33.1048	-4.367
27.7826	-2.993							30.0284	-4.508			33.1398	-4.42
27.8119	-3.031							30.0602	-4.541			33.1747	-4.41
27.8412	-3.031							30.0919	-4.552			33.2097	-4.387
27.8706	-3.014							30.1236	-4.508			33.2447	-4.395
27.8999	-3.054							30.1553	-4.467			33.2797	-4.394
27.9292	-3.111							30.187	-4.549			33.3147	-4.398
27.9586	-3.061											33.3497	-4.405
27.9879	-3.032											33.3847	-4.363
28.0173	-3.111											33.4197	-4.415
28.0466	-3.131											33.4547	-4.425
28.0759	-3.097											33.4897	-4.382
28.1053	-3.164											33.5247	-4.436
28.1346	-3.121											33.5597	-4.42
28.1639	-3.177											33.5947	-4.42
28.1933	-3.196											33.6297	-4.399
28.2226	-3.202											33.6647	-4.377
28.252	-3.184											33.6997	-4.414
28.2813	-3.21											33.7347	-4.379
28.3106	-3.216											33.7697	-4.394
28.34	-3.189											33.8046	-4.37
28.3693	-3.193											33.8396	-4.43
28.3986	-3.192											33.8746	-4.419
28.428	-3.257											33.9096	-4.42
												33.9446	-4.419

## Sheet: Fig. 4S1B-insert
V0:8.62 ml	VC:24 ml
Kav=(VR-V0)/(VC-V0)
MW(Da)	logMW	VR (ml)	Kav
6500	3.81291	21.97	0.86801
13700	4.13672	20.03	0.741873
29000	4.4624	18.98	0.673602
75000	4.87506	17.64	0.586476
158000	5.19866	16.84	0.53446
440000	5.64345	14.88	0.407022
669000	5.82543	13.09	0.290637
DddX		15.95	0.476593
