# Supplementary material for: A novel ATP dependent dimethylsulfoniopropionate lyase in bacteria that releases dimethyl sulfide and acryloyl-CoA
Source: eLife. 2021 May 10;10:e64045. doi: 10.7554/eLife.64045 (PMC8163506; doi:10.7554/eLife.64045)
Supplement: Figure 4—figure supplement 4—source data 1. [file elife-64045-fig15-data15.xls]

## Sheet: Fig. S10
	CD(mdeg)
Wavelength(nm)	WT	H292A	W391A	F435A	Y181A	D208A	E432A
250	-0.439955	-0.670459	-0.365618	-0.60275	-0.238606	-0.680002	-0.154227
249.5	-0.159698	-0.458838	-0.744487	-0.829189	0.110431	-0.854585	-0.0741691
249	-0.531926	-0.67411	-0.869428	-0.823832	-0.1921	-0.970154	-0.15966
248.5	-0.769525	-0.812797	-0.945643	-0.776965	-0.148985	-0.83497	-0.279195
248	-0.95507	-0.884446	-1.15598	-0.848378	-0.443438	-0.815102	-0.345802
247.5	-1.349	-1.06262	-1.17698	-0.773593	-0.459403	-0.828582	-0.365262
247	-1.41943	-1.10408	-1.25056	-1.02452	-0.601052	-0.988348	-0.649826
246.5	-1.43317	-1.27503	-1.42208	-0.957966	-0.761109	-1.05706	-0.897988
246	-1.64374	-1.43987	-1.57764	-1.19059	-1.04345	-1.32508	-1.11666
245.5	-1.84922	-1.38356	-1.58079	-1.22952	-0.940011	-1.43314	-1.38823
245	-1.65653	-1.30411	-1.87033	-1.49248	-0.956122	-1.52052	-1.25707
244.5	-1.65278	-1.5212	-2.00198	-1.864	-1.31946	-1.77446	-1.66852
244	-1.80678	-1.90584	-2.25972	-2.02661	-1.53656	-1.96506	-1.93688
243.5	-2.10378	-1.96925	-2.50958	-2.30609	-1.89825	-2.09576	-2.31935
243	-2.63526	-2.03332	-3.02839	-2.85838	-2.35166	-2.62565	-2.63591
242.5	-2.49798	-2.38859	-3.2873	-2.91892	-2.7561	-2.88792	-2.91658
242	-3.24208	-2.93893	-3.6668	-3.46807	-3.21392	-3.40006	-3.42817
241.5	-3.32186	-3.36015	-3.98149	-3.64171	-3.40093	-3.86898	-3.64727
241	-4.01285	-3.85085	-4.51915	-4.17817	-3.69045	-4.35358	-4.01825
240.5	-4.31038	-4.34685	-4.69458	-4.48242	-3.87415	-4.64241	-4.2925
240	-5.09379	-5.24227	-5.12078	-5.03652	-4.29288	-5.16648	-4.67063
239.5	-5.8397	-6.09648	-5.59997	-5.74193	-4.79212	-5.7466	-5.30763
239	-6.2253	-6.40729	-6.01909	-6.07628	-4.90381	-6.0767	-5.48255
238.5	-6.9353	-7.06155	-6.54694	-6.65371	-5.61466	-6.61595	-6.04237
238	-7.5303	-7.74826	-7.22837	-7.3715	-6.3186	-7.44003	-6.74022
237.5	-8.0023	-8.19504	-7.94389	-8.19694	-7.10551	-8.14087	-7.53712
237	-8.71846	-8.94788	-8.87086	-9.0476	-7.88672	-9.11058	-8.20746
236.5	-9.59669	-9.63955	-9.6485	-9.53396	-8.71217	-9.7035	-9.07128
236	-10.3528	-10.5935	-10.7688	-10.6694	-9.5371	-10.6897	-9.9433
235.5	-11.5951	-11.8789	-11.6194	-11.7721	-10.5602	-11.637	-11.006
235	-12.6552	-12.9888	-12.8629	-12.7596	-11.41	-12.5976	-12.3637
234.5	-14.0121	-14.435	-14.0588	-13.5752	-12.3068	-13.6029	-13.0392
234	-15.4932	-15.6955	-15.4216	-14.5867	-13.4154	-14.8077	-14.3675
233.5	-16.8992	-16.9962	-16.9312	-16.1444	-14.271	-16.1081	-15.4254
233	-17.8949	-18.4038	-18.1242	-16.9955	-15.031	-17.2881	-16.6098
232.5	-19.1013	-19.3196	-19.01	-17.8382	-16.1426	-18.2471	-17.8216
232	-20.1283	-20.319	-20.2713	-18.9216	-16.9191	-19.2872	-18.7448
231.5	-21.4741	-21.5942	-21.4751	-20.2687	-18.1023	-20.4415	-19.5408
231	-22.5731	-22.5888	-22.6653	-21.2014	-19.2267	-21.6876	-20.8986
230.5	-23.6064	-23.862	-23.8027	-22.2166	-20.3431	-22.7557	-22.3009
230	-24.9869	-25.1862	-25.3808	-23.5229	-21.6043	-24.2285	-23.5119
229.5	-26.3184	-26.19	-26.498	-24.7332	-22.9618	-25.601	-24.5362
229	-27.8946	-27.3105	-27.5775	-25.6586	-23.9372	-26.5152	-25.4618
228.5	-28.6579	-28.392	-28.7816	-26.5844	-24.9027	-27.689	-26.3305
228	-29.7384	-29.6084	-30.2083	-27.8537	-25.5428	-28.8848	-27.1553
227.5	-30.9344	-31.0236	-31.4097	-29.3814	-26.54	-30.036	-28.34
227	-31.8445	-32.0527	-32.3876	-30.2044	-27.5337	-30.8066	-29.0265
226.5	-32.5232	-33.1631	-33.0747	-31.0184	-28.6524	-31.3111	-30.0915
226	-33.7154	-34.2339	-34.2829	-32.1671	-29.5704	-32.3405	-31.1912
225.5	-34.1554	-34.7994	-34.9696	-32.9352	-30.4844	-33.0221	-31.8532
225	-35.2488	-35.7306	-35.638	-33.7312	-31.3167	-33.6812	-32.348
224.5	-36.2915	-36.537	-36.2111	-34.1875	-32.0244	-34.1068	-33.0826
224	-36.5928	-36.9978	-36.9104	-34.7502	-32.7243	-34.8967	-33.48
223.5	-36.753	-37.1833	-37.6505	-35.4319	-32.9916	-35.58	-33.9965
223	-37.2453	-37.6924	-37.8414	-36.0588	-33.2964	-36.0384	-34.4296
222.5	-37.2824	-37.7089	-38.1917	-36.3102	-33.6278	-36.5782	-34.4268
222	-37.8946	-38.023	-38.3596	-36.622	-33.6758	-37.074	-34.7587
221.5	-37.9168	-38.3852	-38.6123	-36.5731	-34.2314	-37.4293	-35.3171
221	-38.4218	-38.6322	-38.4303	-36.7006	-34.4808	-37.6193	-35.8626
220.5	-38.4864	-38.5974	-38.6739	-36.6266	-34.4553	-37.5509	-36.0386
220	-39.0808	-38.6269	-38.6288	-36.6998	-34.1328	-37.7911	-35.9265
219.5	-38.8389	-38.8172	-38.9887	-36.8093	-34.4116	-37.7169	-36.1907
219	-38.7341	-38.9998	-39.3136	-36.6383	-35.0843	-37.6484	-36.5808
218.5	-38.8901	-39.0634	-39.4496	-36.5407	-35.0032	-37.6847	-36.0911
218	-38.6434	-38.9278	-39.1495	-36.4729	-34.6838	-37.3896	-35.9946
217.5	-38.3925	-38.9022	-39.3442	-36.4634	-35.222	-37.6174	-35.7463
217	-38.0291	-39.1063	-39.7804	-36.6311	-35.3638	-37.6746	-35.3095
216.5	-37.8758	-38.7029	-39.6001	-36.4562	-35.1881	-37.7591	-34.9023
216	-37.3941	-38.3215	-39.1503	-36.298	-35.1336	-37.7278	-35.0599
215.5	-36.829	-37.9312	-38.9725	-36.3518	-35.0412	-37.6884	-34.9383
215	-37.0562	-37.9733	-38.5146	-36.1393	-35.1886	-37.0781	-35.1444
214.5	-36.7686	-37.5725	-38.3289	-35.9954	-35.2299	-36.8398	-34.6478
214	-36.5418	-37.2937	-38.1905	-36.0758	-34.9637	-36.5997	-34.9138
213.5	-36.6712	-37.068	-37.5399	-35.5246	-35.3579	-36.2046	-35.1867
213	-36.7262	-36.9195	-37.405	-35.0597	-35.7349	-35.9982	-35.0651
212.5	-36.9208	-37.0867	-37.2557	-35.0392	-35.7877	-35.8629	-34.6378
212	-36.7115	-36.9617	-36.8396	-35.1164	-35.4019	-35.6906	-34.2674
211.5	-36.2496	-36.6099	-36.9074	-35.4037	-35.7967	-36.1465	-34.1245
211	-36.2515	-37.0764	-36.6912	-35.5654	-35.5432	-36.0473	-34.2702
210.5	-36.0398	-37.1865	-36.5962	-35.177	-35.2366	-36.1509	-33.7106
210	-36.1403	-37.0277	-36.642	-35.2363	-35.2455	-36.103	-33.2039
209.5	-36.1253	-36.8907	-36.3608	-35.323	-35.3316	-36.0196	-33.1885
209	-35.8533	-37.0531	-36.1019	-35.0063	-35.5966	-35.3691	-33.321
208.5	-35.547	-36.4583	-35.6103	-34.4436	-35.6765	-35.033	-33.5729
208	-35.0158	-35.0039	-34.754	-33.3592	-35.0802	-33.8013	-33.0332
207.5	-33.7395	-34.0964	-33.7199	-32.1486	-34.412	-32.536	-32.2971
207	-33.1293	-32.2868	-32.5762	-31.1672	-33.7911	-30.9386	-30.9059
206.5	-29.9933	-30.501	-30.2358	-28.9615	-32.4302	-28.7411	-28.7475
206	-27.6698	-28.4696	-28.3461	-27.1637	-30.25	-26.8722	-25.343
205.5	-25.9224	-25.3755	-27.4365	-25.0718	-28.6962	-24.6306	-23.2945
205	-23.1579	-23.2618	-24.3872	-22.4089	-25.309	-21.8026	-21.1894
204.5	-20.0723	-19.7558	-19.7281	-18.4895	-23.2647	-18.5844	-16.854
204	-16.7619	-16.4397	-16.5631	-15.6538	-20.2233	-15.4318	-13.4913
203.5	-12.9061	-13.8047	-12.8328	-12.4267	-17.141	-12.7298	-10.1715
203	-9.57242	-10.0354	-7.19329	-9.248	-13.7519	-9.49009	-6.43925
202.5	-5.30875	-5.31096	-4.47051	-4.47352	-9.16364	-3.90332	-1.47775
202	-0.19684	-1.6589	-0.55794	0.0554974	-6.18859	0.321909	4.37583
201.5	5.00602	3.24029	4.68627	4.17274	-1.52038	7.11701	9.71891
201	11.8224	9.08948	12.6048	10.5094	7.09678	13.0316	14.6987
200.5	17.8518	13.5747	19.0616	17.5408	12.32	19.0236	16.6451
200	23.7418	20.9409	26.5679	21.757	20.1287	25.6653	21.5617
