# Supplementary material for: A novel ATP dependent dimethylsulfoniopropionate lyase in bacteria that releases dimethyl sulfide and acryloyl-CoA
Source: eLife. 2021 May 10;10:e64045. doi: 10.7554/eLife.64045 (PMC8163506; doi:10.7554/eLife.64045)
Supplement: Figure 4—source data 1. [file elife-64045-fig4-data1.xls]

## Sheet: Fig. 4C
	Relative activity(%)
WT	102.566	98.7171	98.7171
H292A	1.22688	0.827745	1.85211
W391A	2.98383	3.9926	2.7227
F435A	6.94905	4.96512	7.10334
Y181A	35.4226	34.8879	43.3315
D208A	47.3065	49.6364	43.0264
E432A	1.58257	0.368191	-0.298196
